# Supplementary material for: Genome mining of biosynthetic and chemotherapeutic gene clusters in Streptomyces bacteria
Source: PubMed Central journal article supplement (PMC7005152; doi:10.1038/s41598-020-58904-9), 2020-02-06

**Genome mining of biosynthetic and chemotherapeutic gene clusters  
in *Streptomyces* bacteria**

**Supplementary information**

Kaitlyn C. Belknap, Cooper J. Park, Brian M. Barth and Cheryl P. Andam

University of New Hampshire, Department of Molecular, Cellular and Biomedical Sciences,

Durham, NH 03824, USA

Corresponding Author: [Cheryl.Andam@unh.edu](mailto:Cheryl.Andam@unh.edu)

## Supplementary information

**Supplementary Table S1.** Accession numbers of the 1,110 *Streptomyces* genomes used in this study.

**Supplementary Table S2.** List of CGCs used in Figure 3. Sequences were obtained from DoBISCUIT.

**Supplementary Table S3.** List of individual genes per CGC and BLASTX results for individual genes in each CGC. Numbers represent the percentage sequence similarity to the query sequence.

**Supplementary Dataset S4.** Sequence alignment of *rpoB*

**Supplementary Dataset S5.** *rpoB* phylogenetic tree with bootstrap values

**Supplementary Figure S1.** Number of CGCs identified using different threshold values of cluster completeness and e-values. Numbers in blue squares are those that were included in the study.

# Aclacinomycin\_A

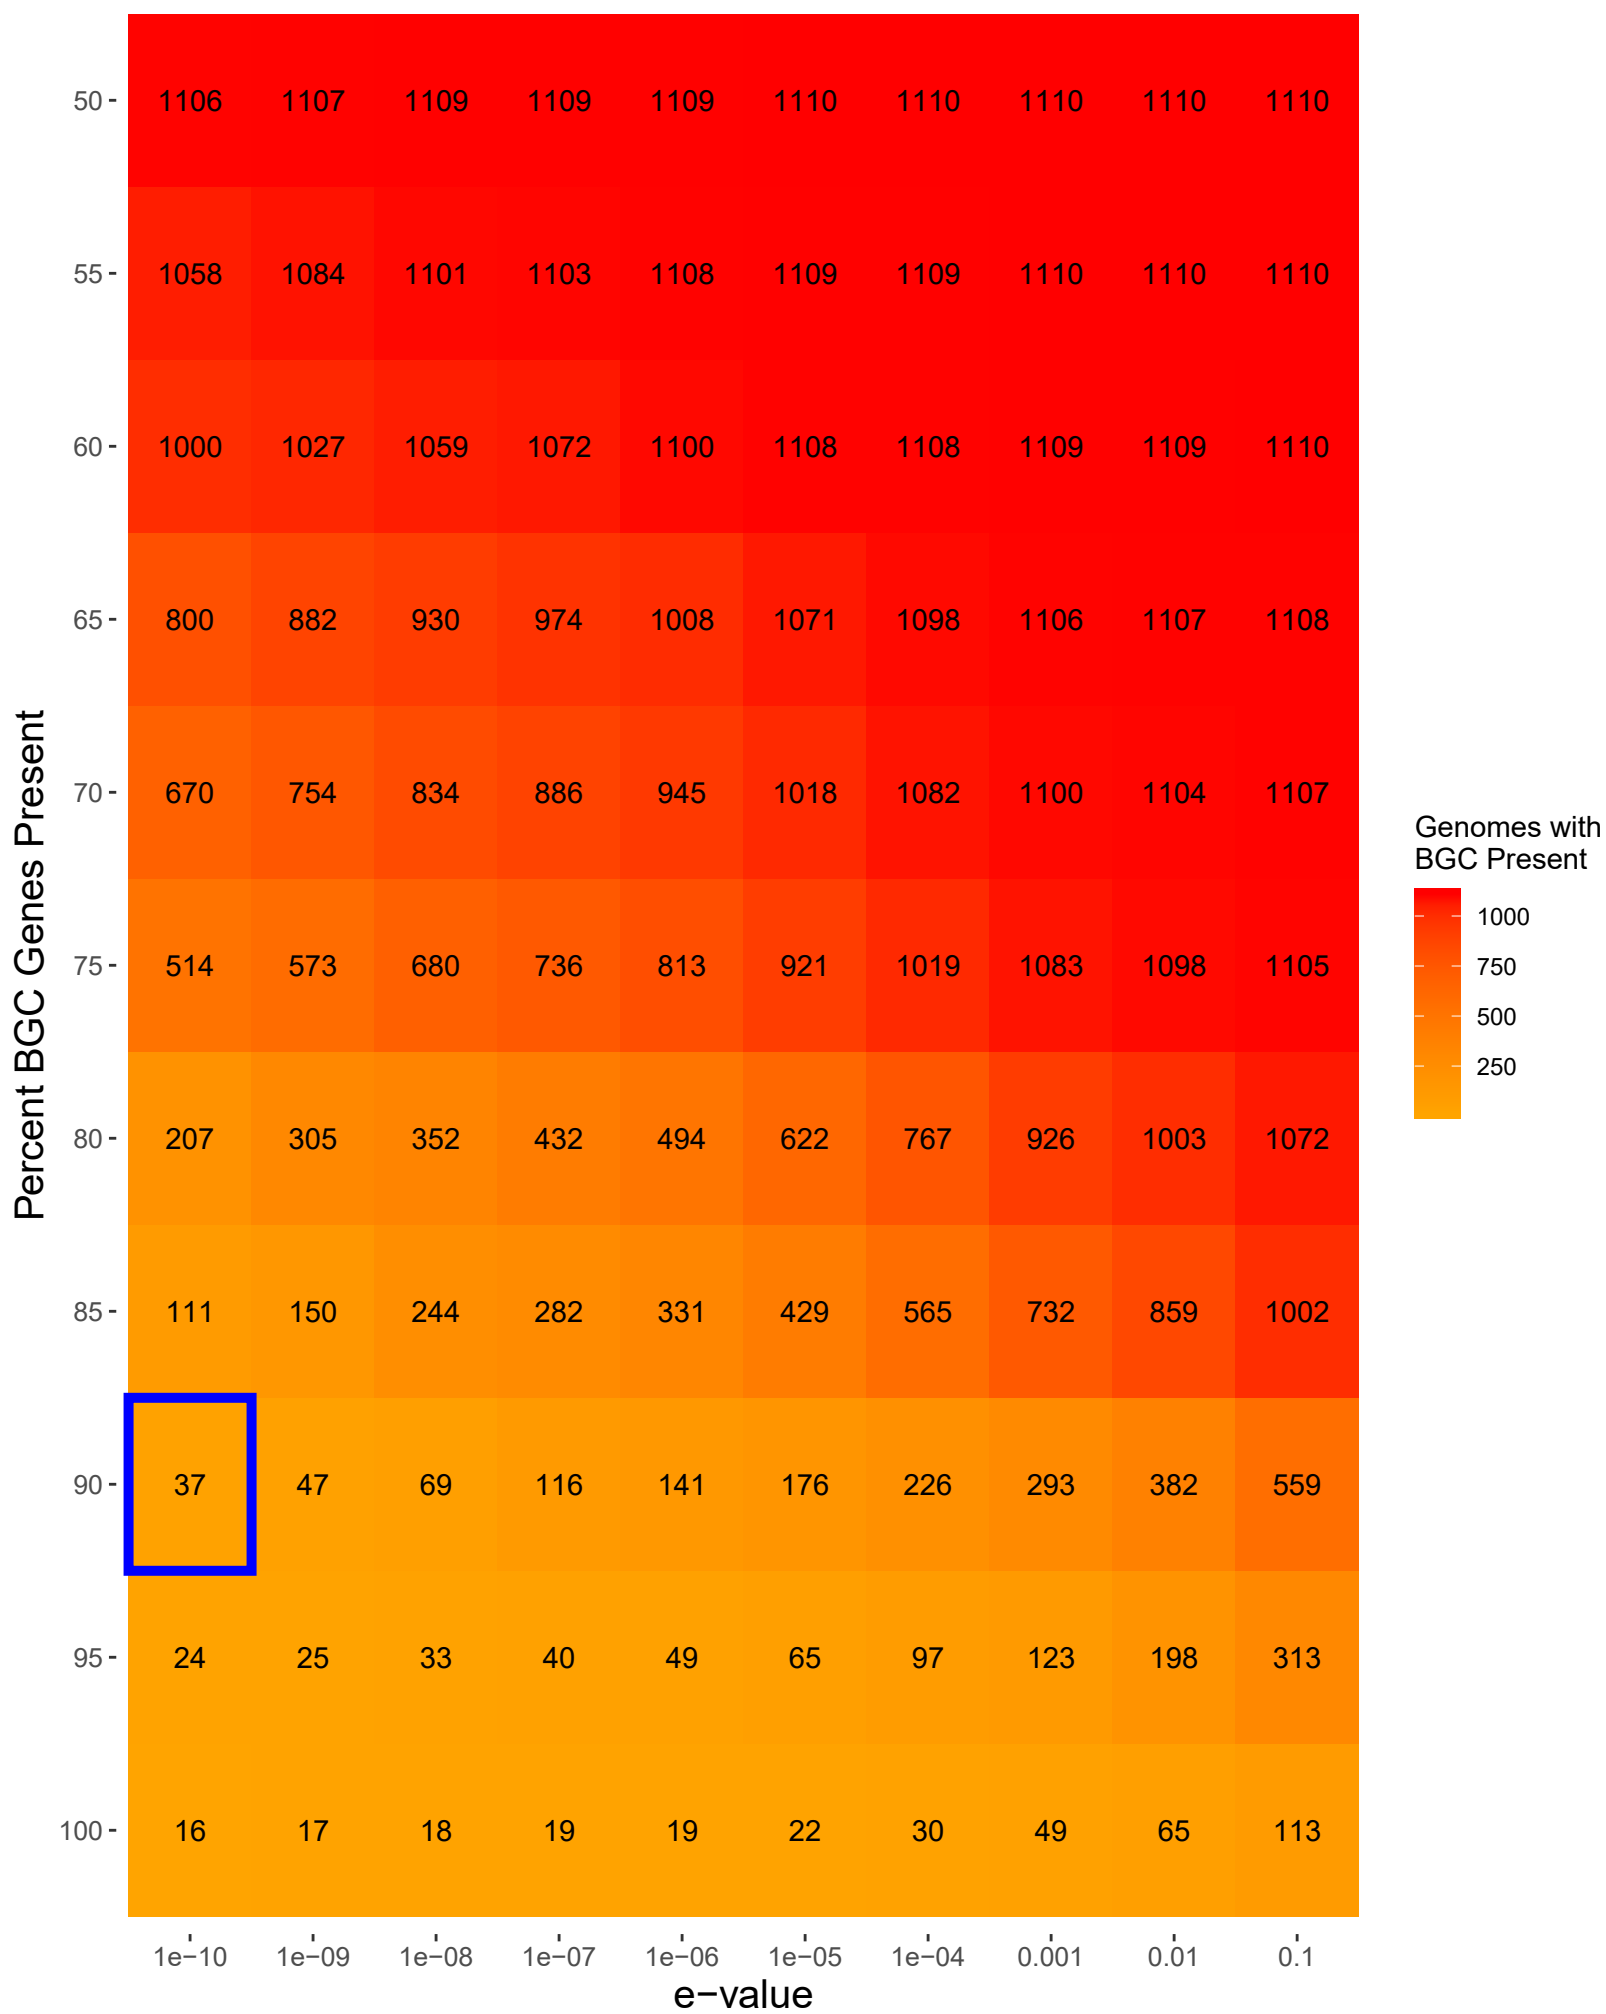



# Aureothin

Percent BGC Genes Present

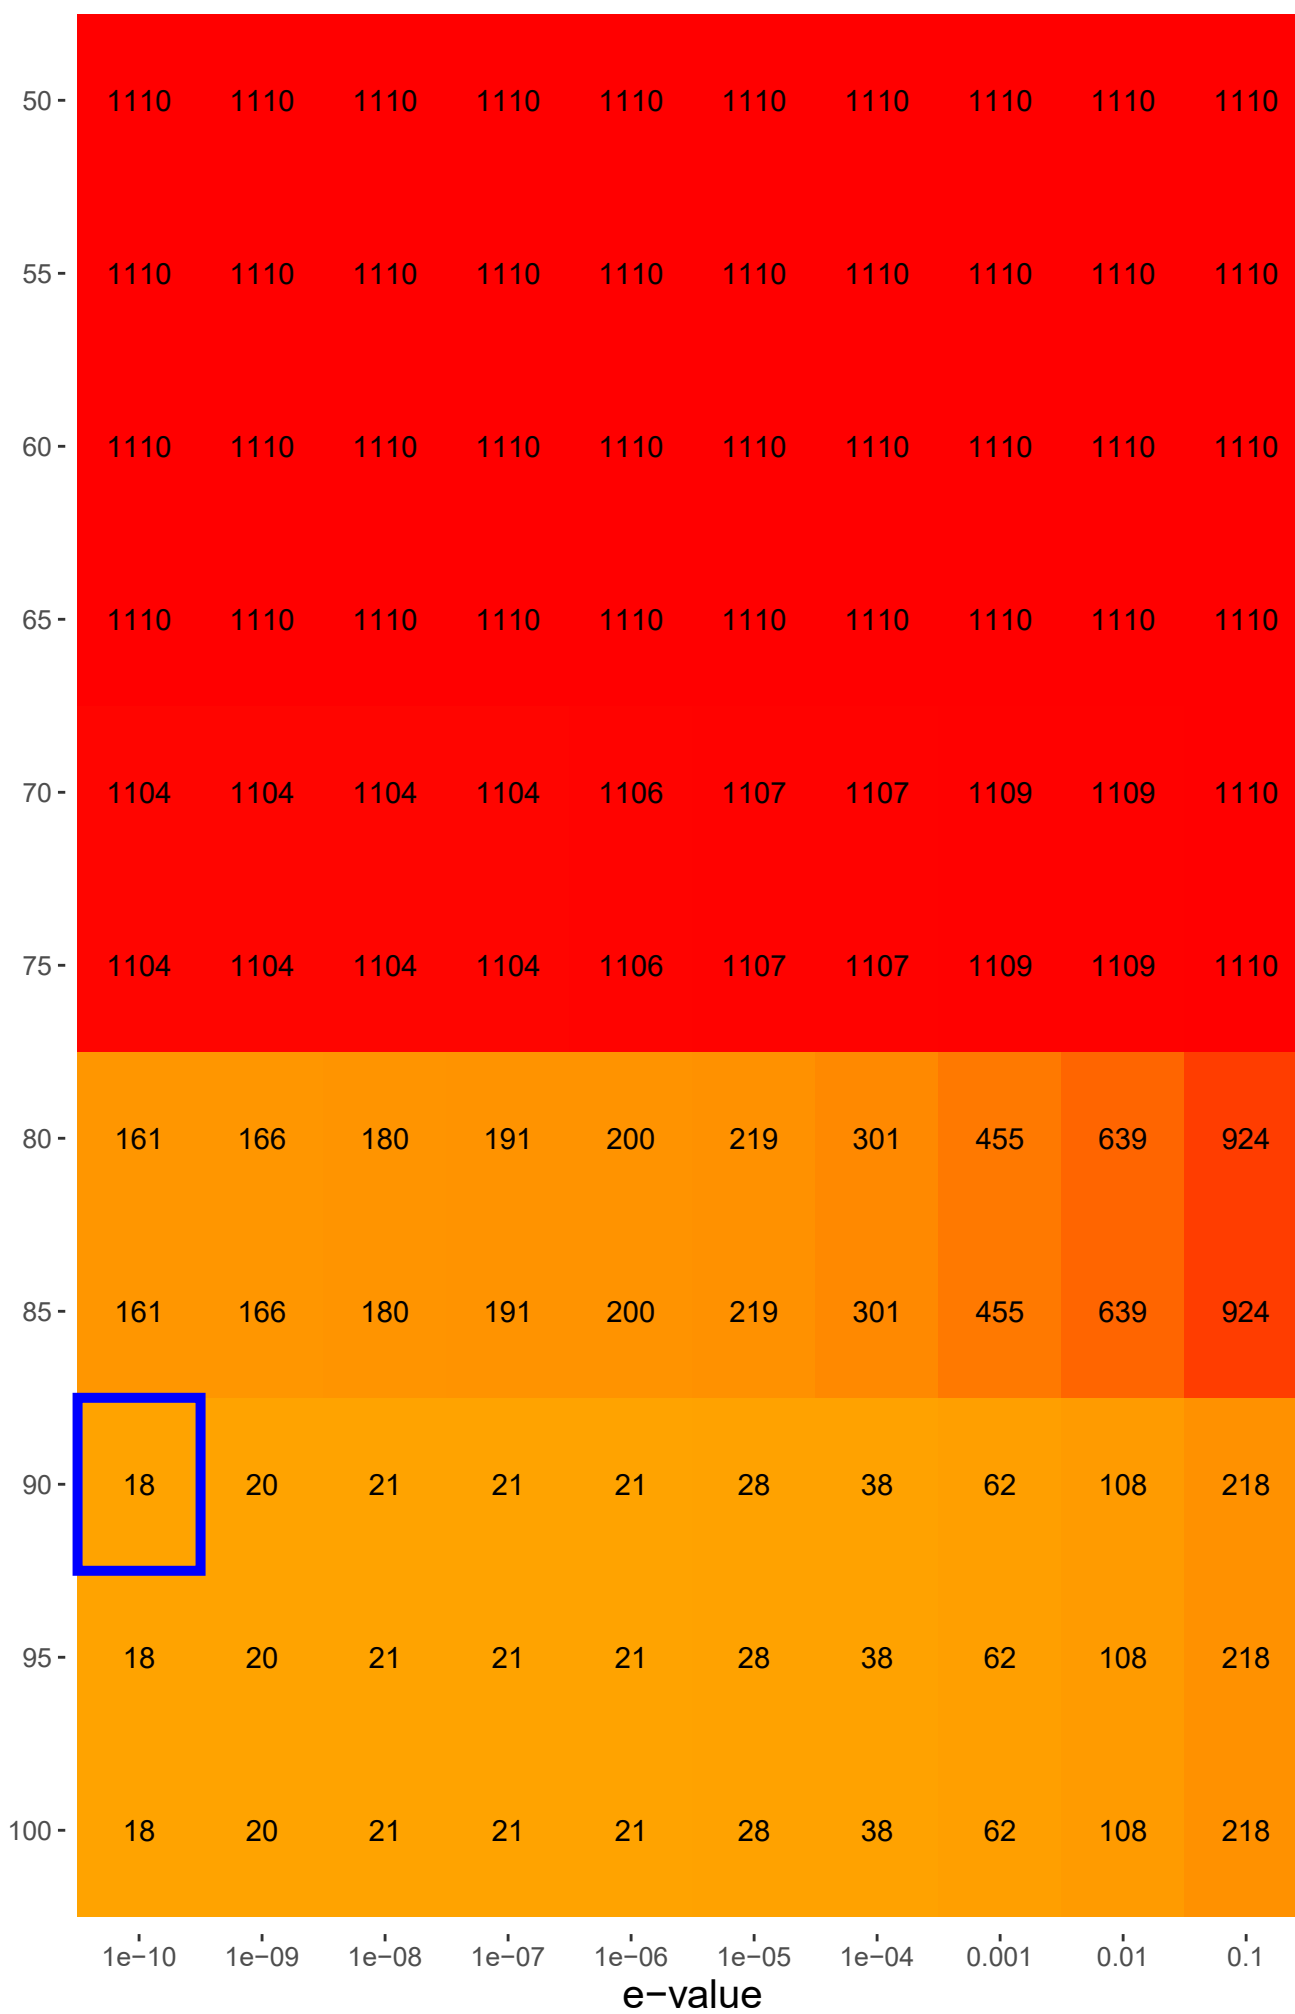

Genomes with BGC Present

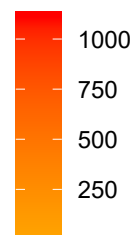



# C\_1027

Percent BGC Genes Present

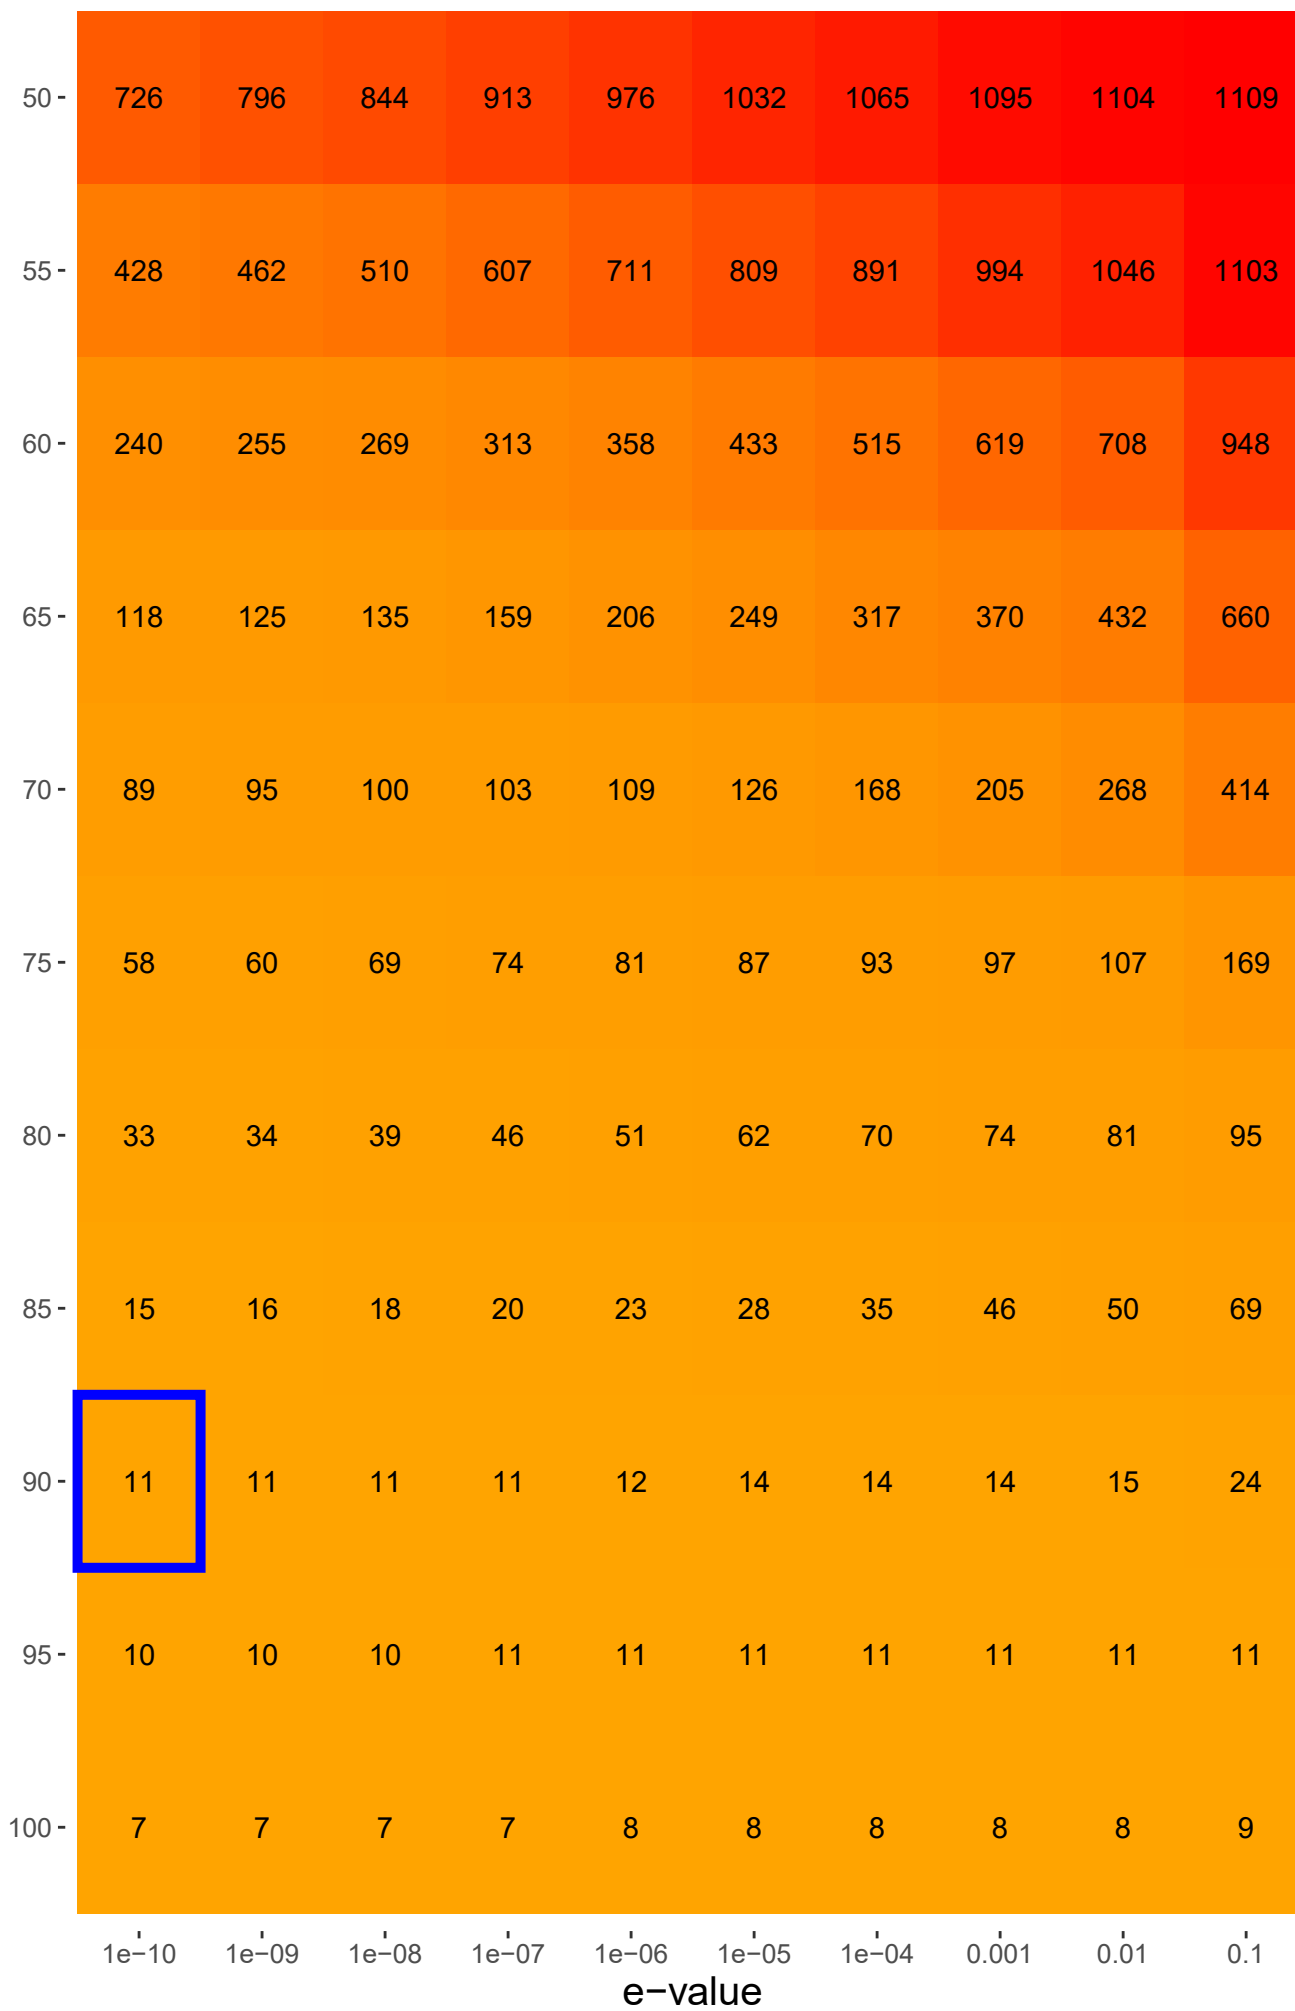

Genomes with BGC Present

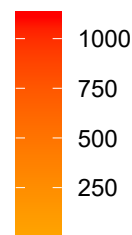







# Concanamycin\_A

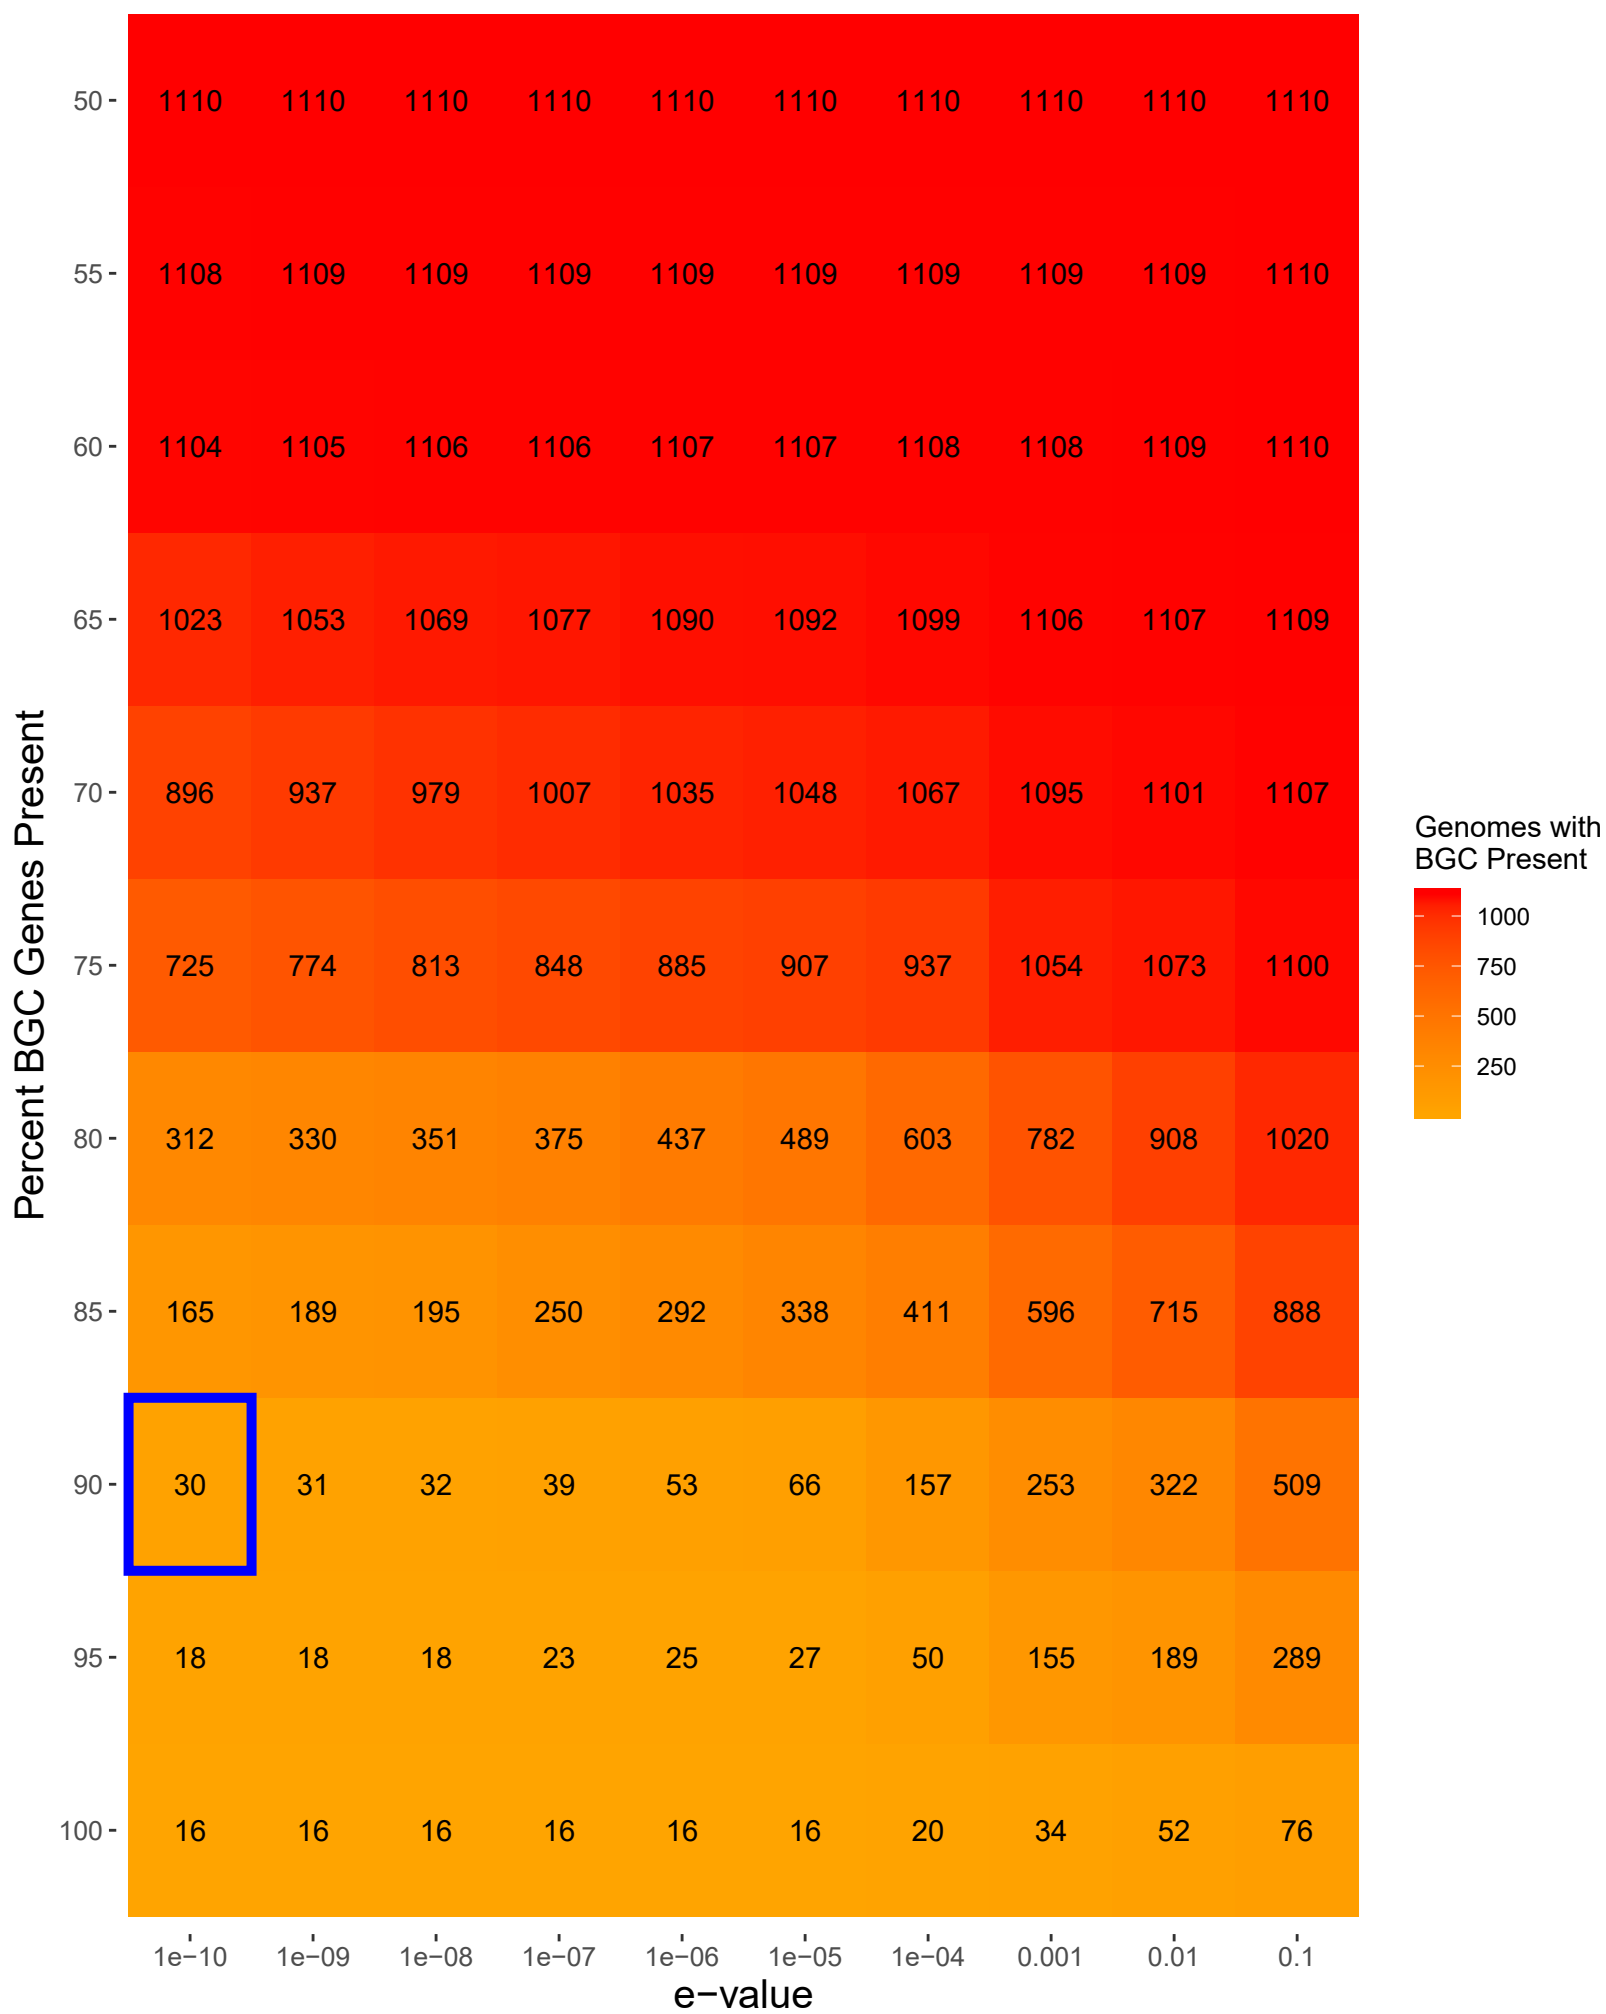



# Daunorubicin

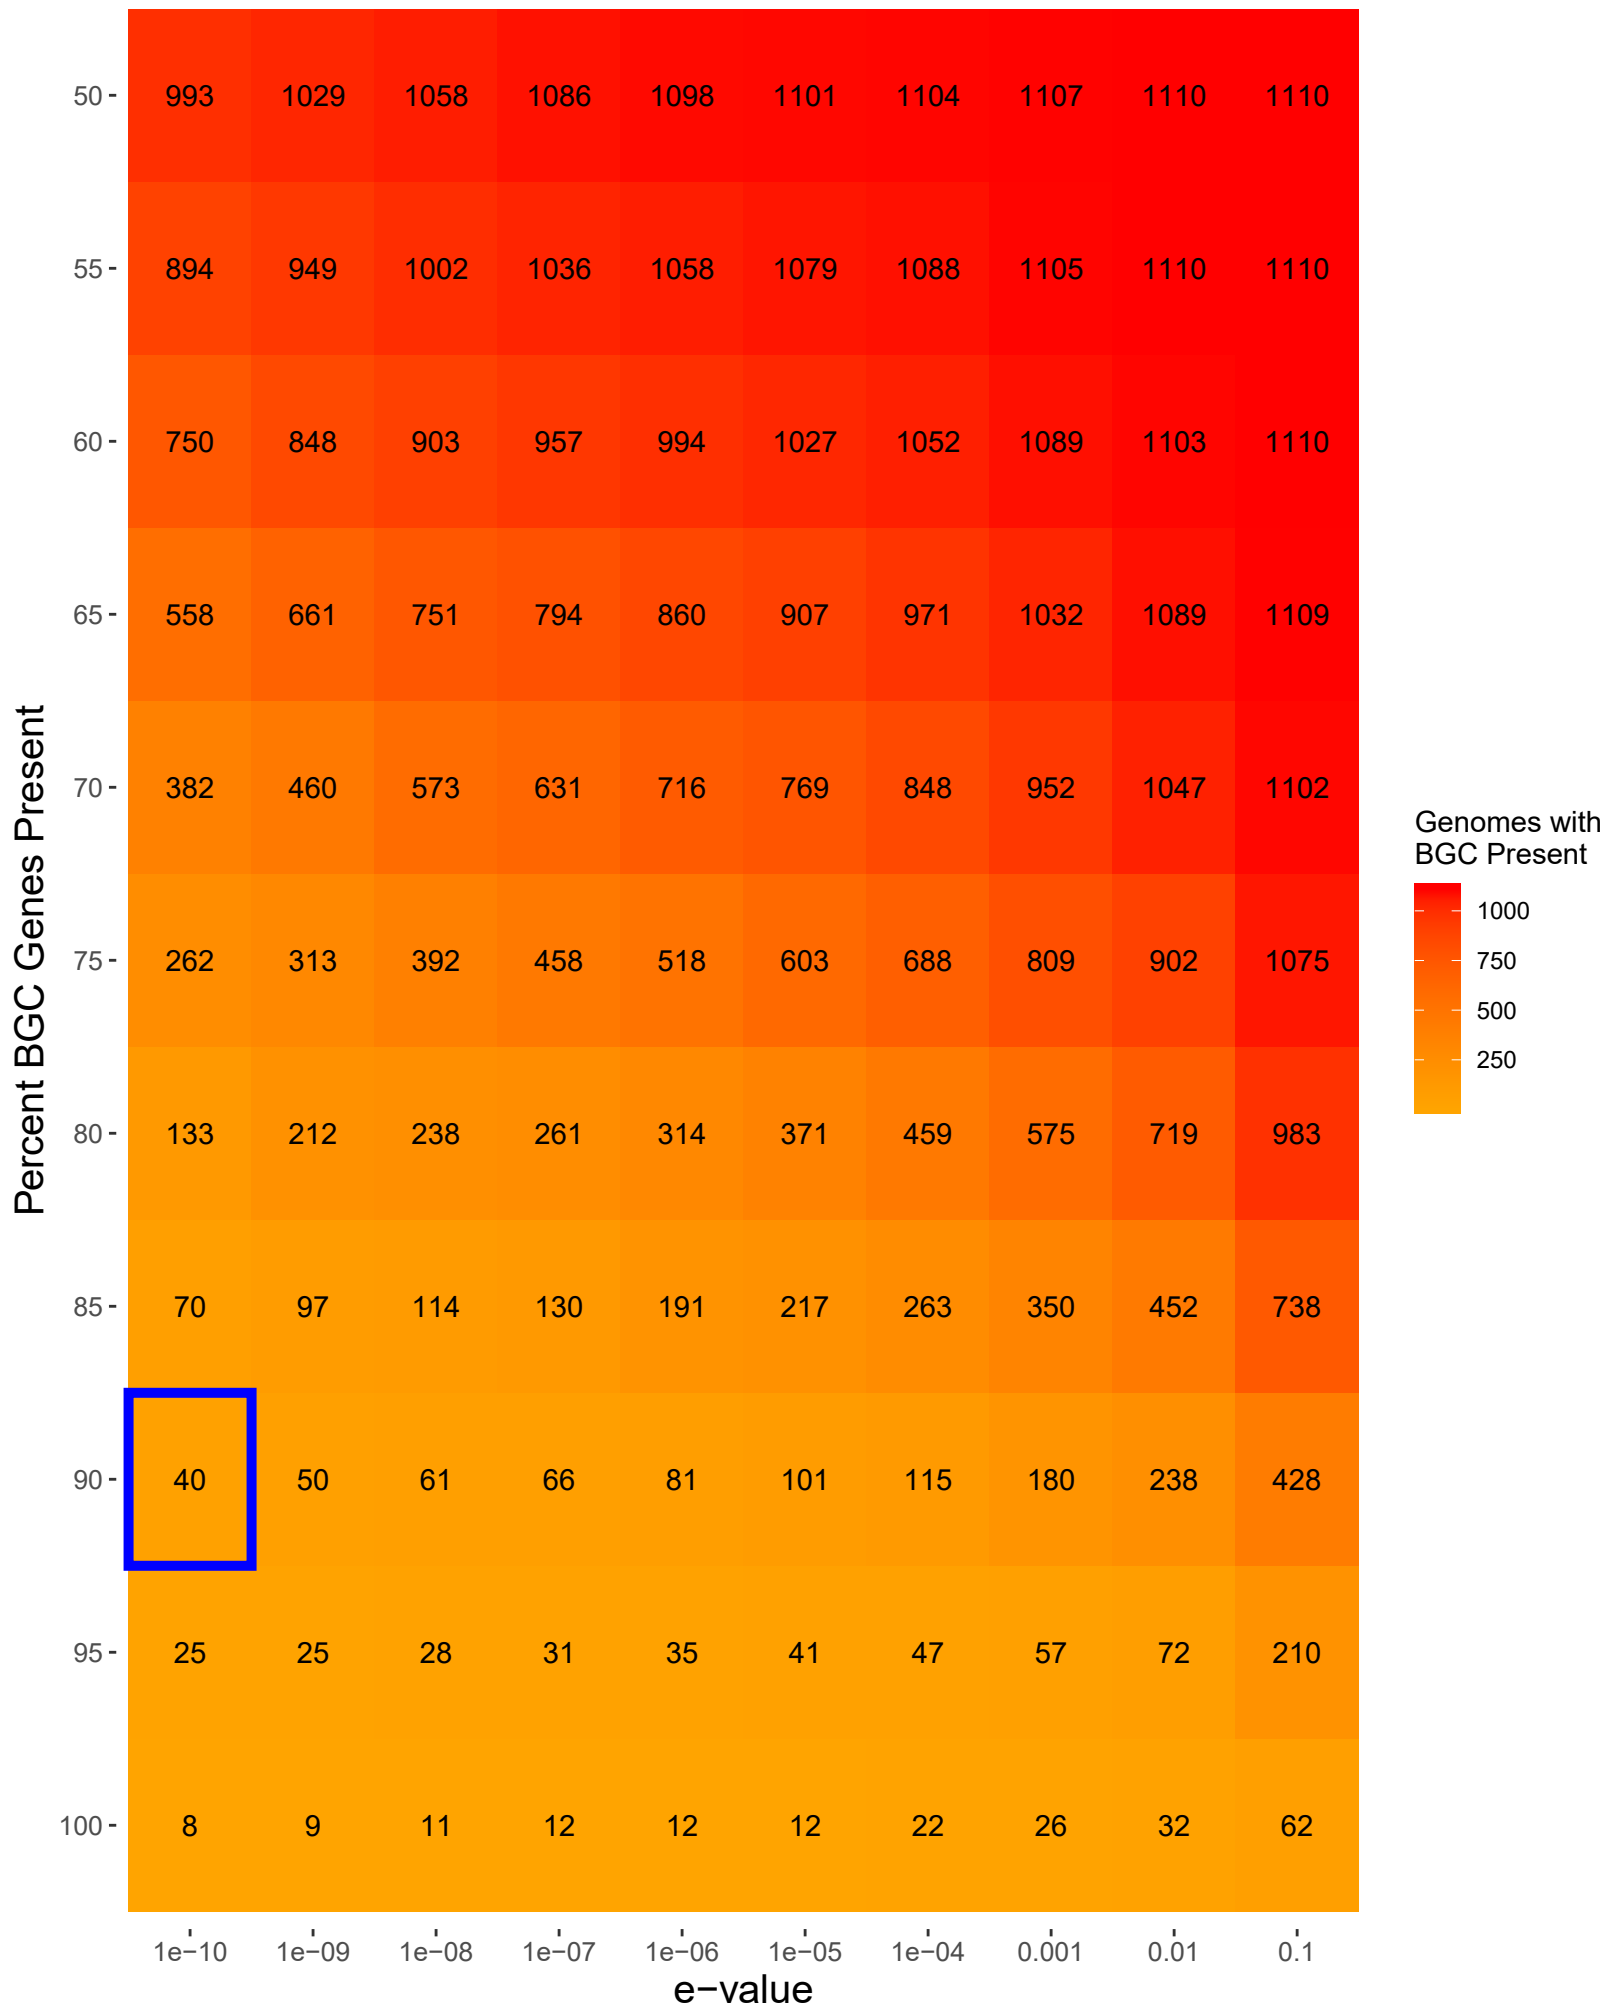

# Doxorubicin

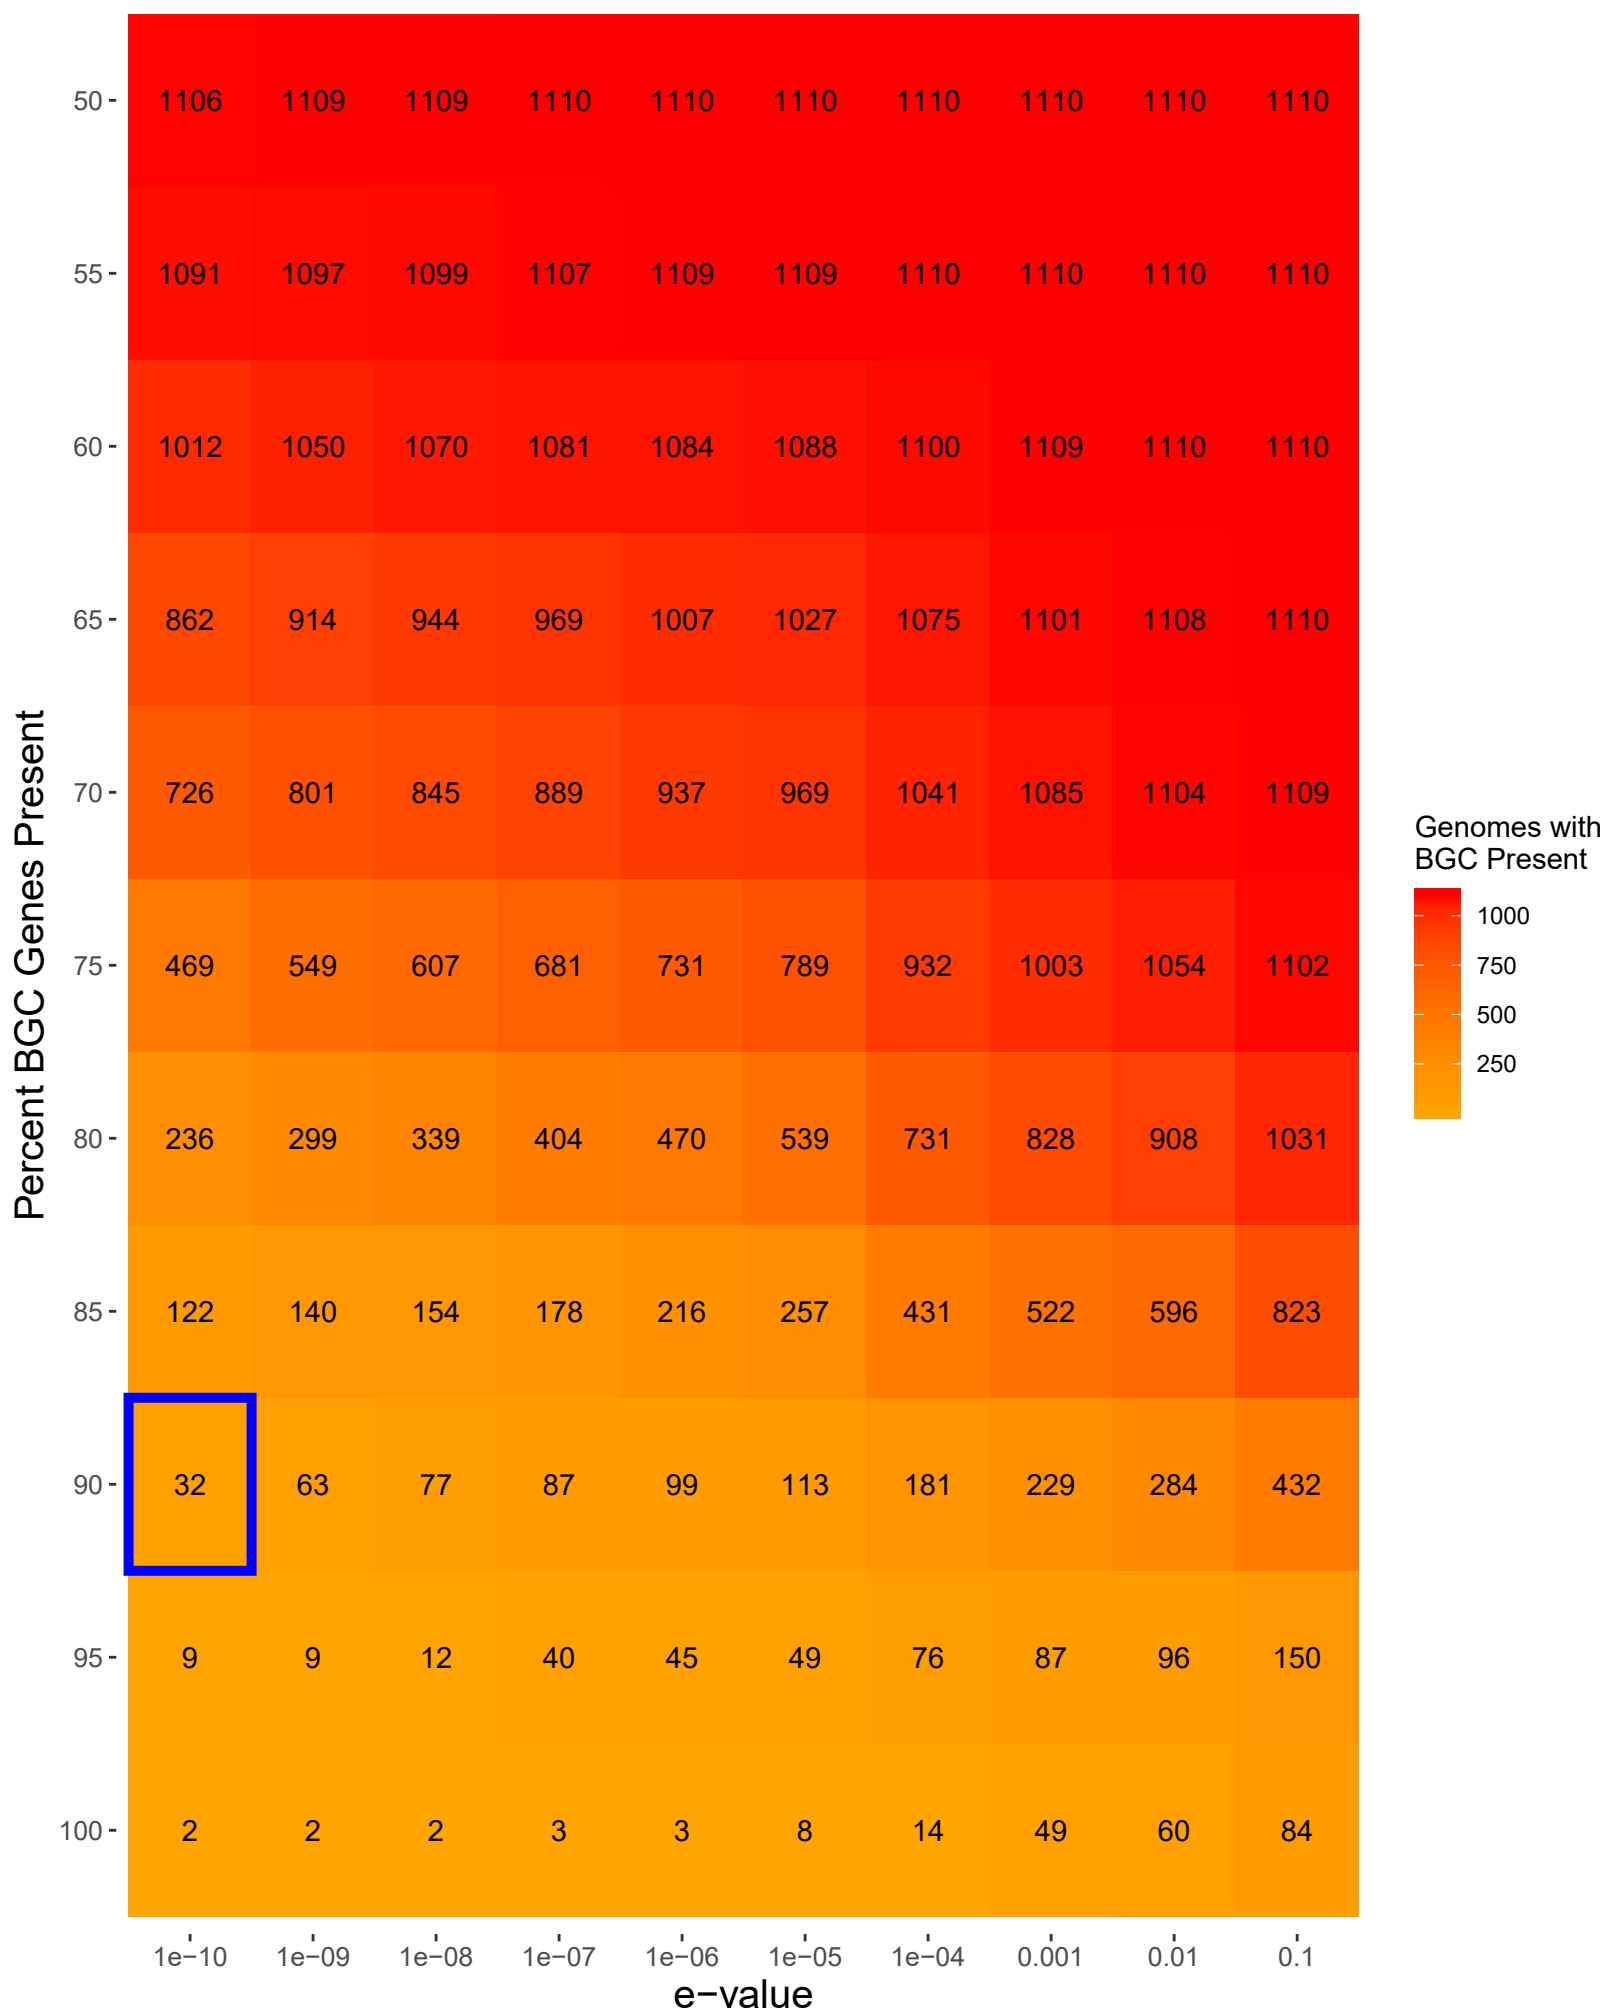



# FD\_891

Percent BGC Genes Present

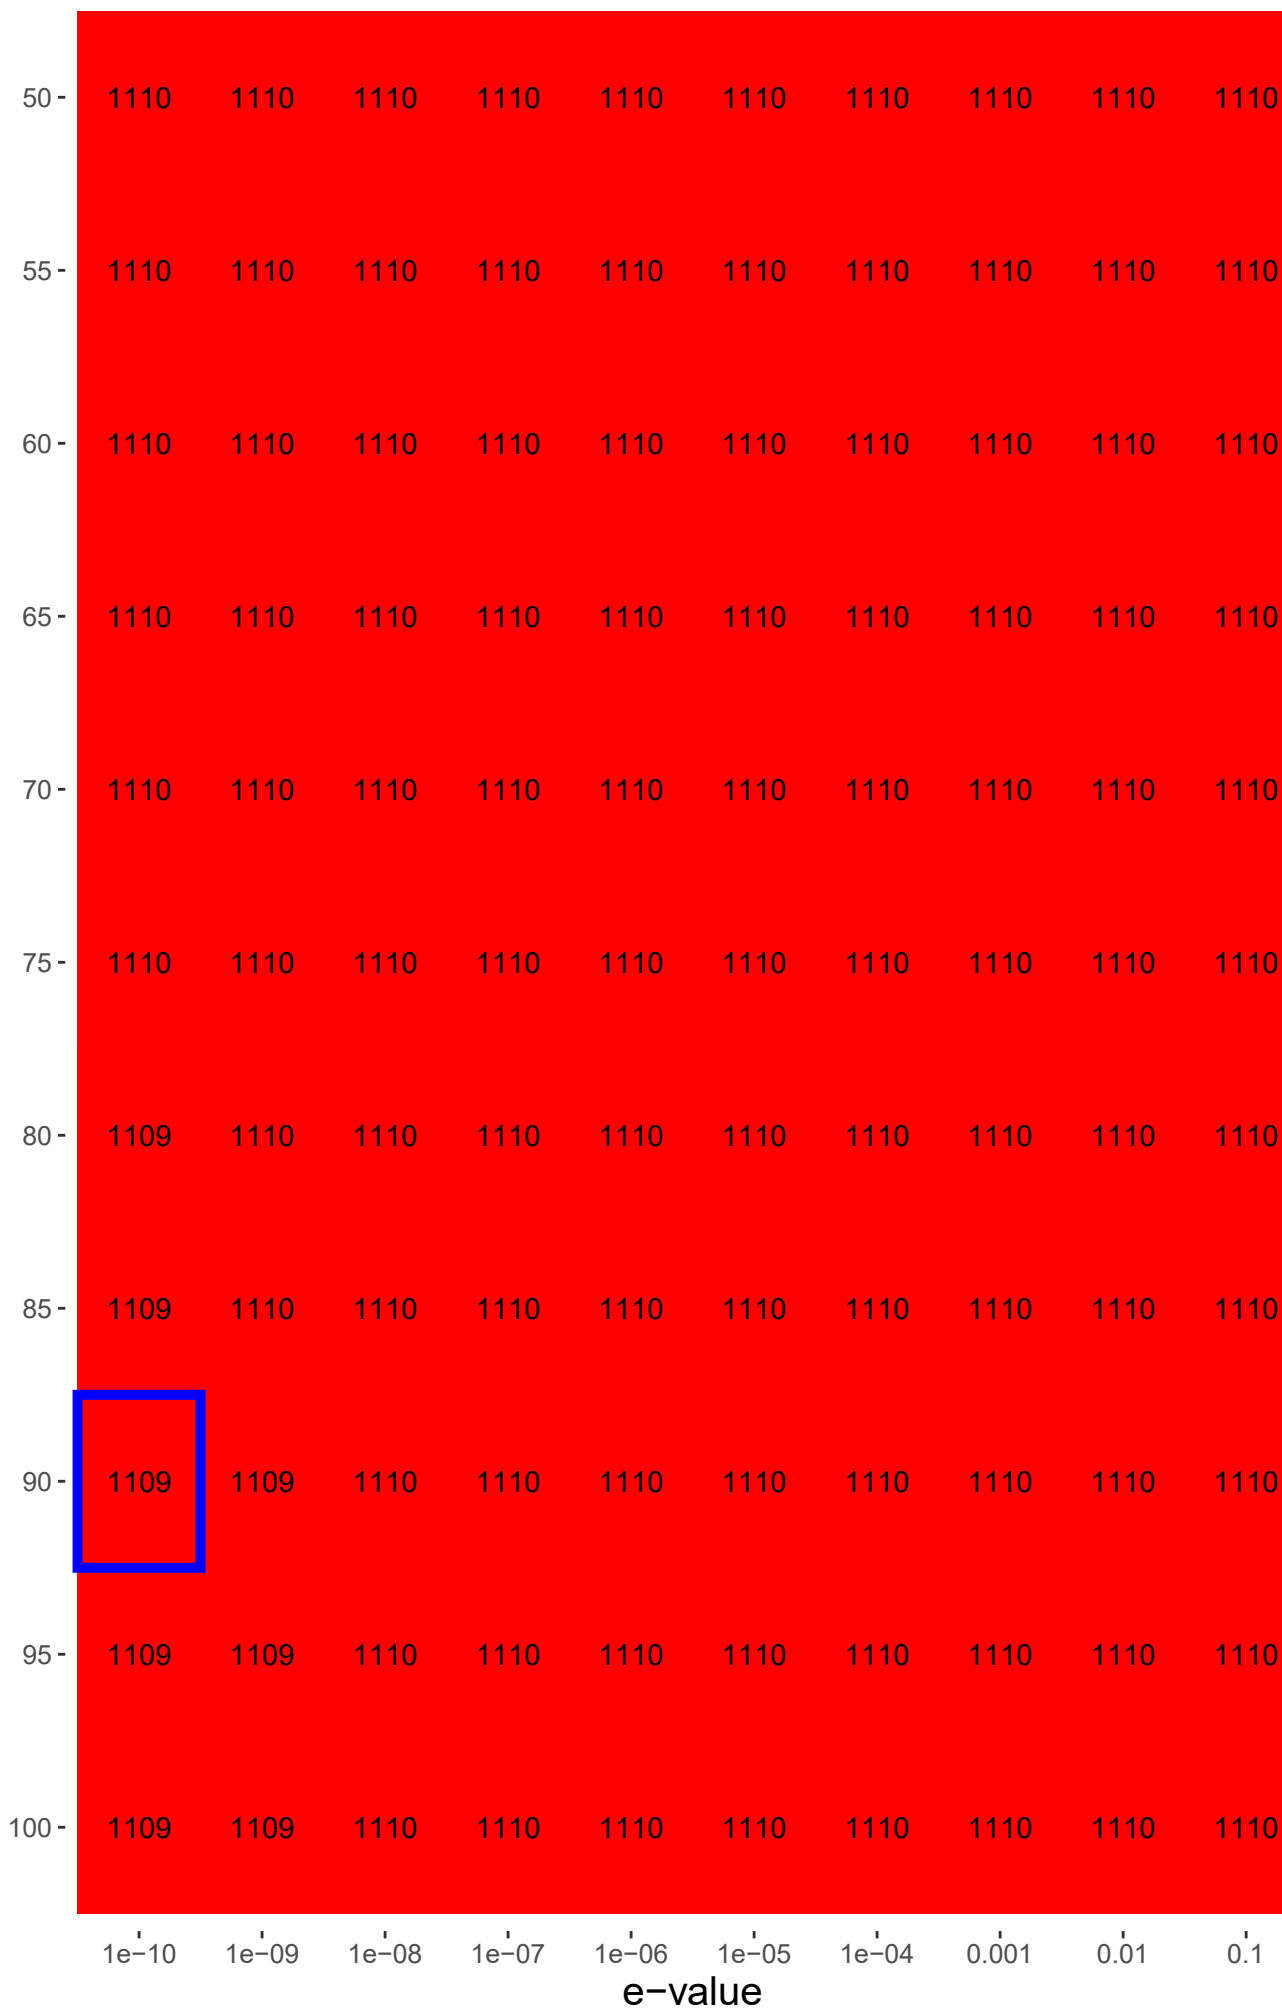

Genomes with BGC Present

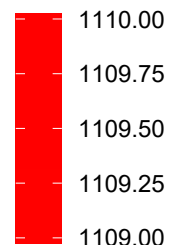



# Fredericamycin

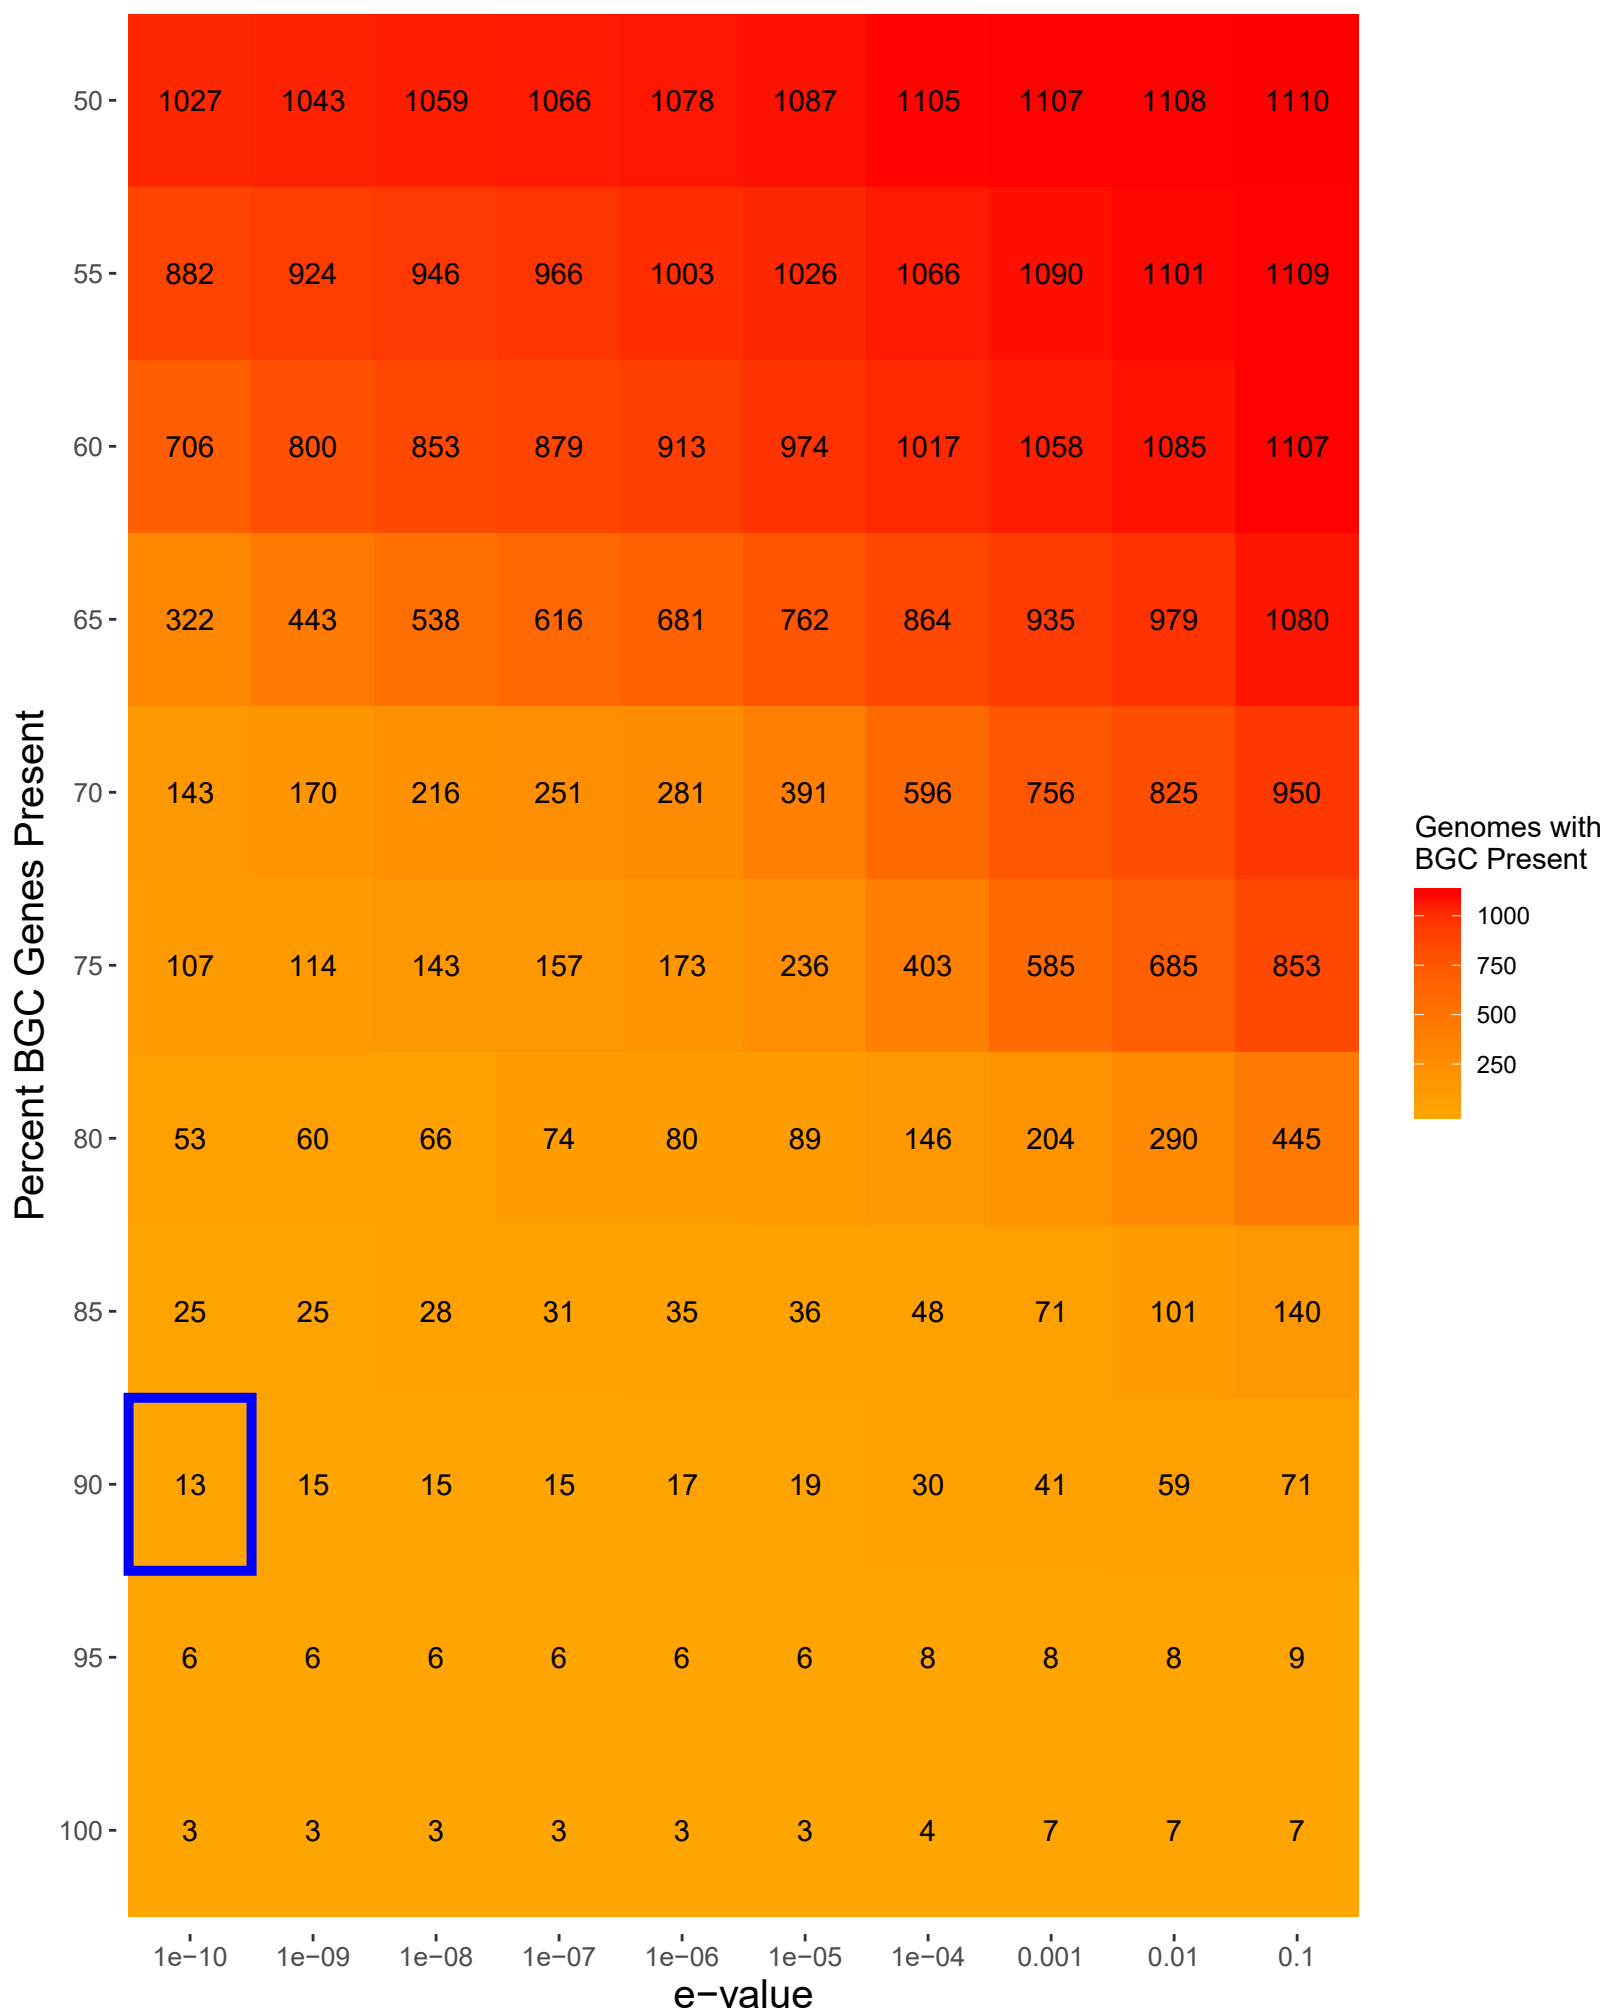

# Geldanamycin

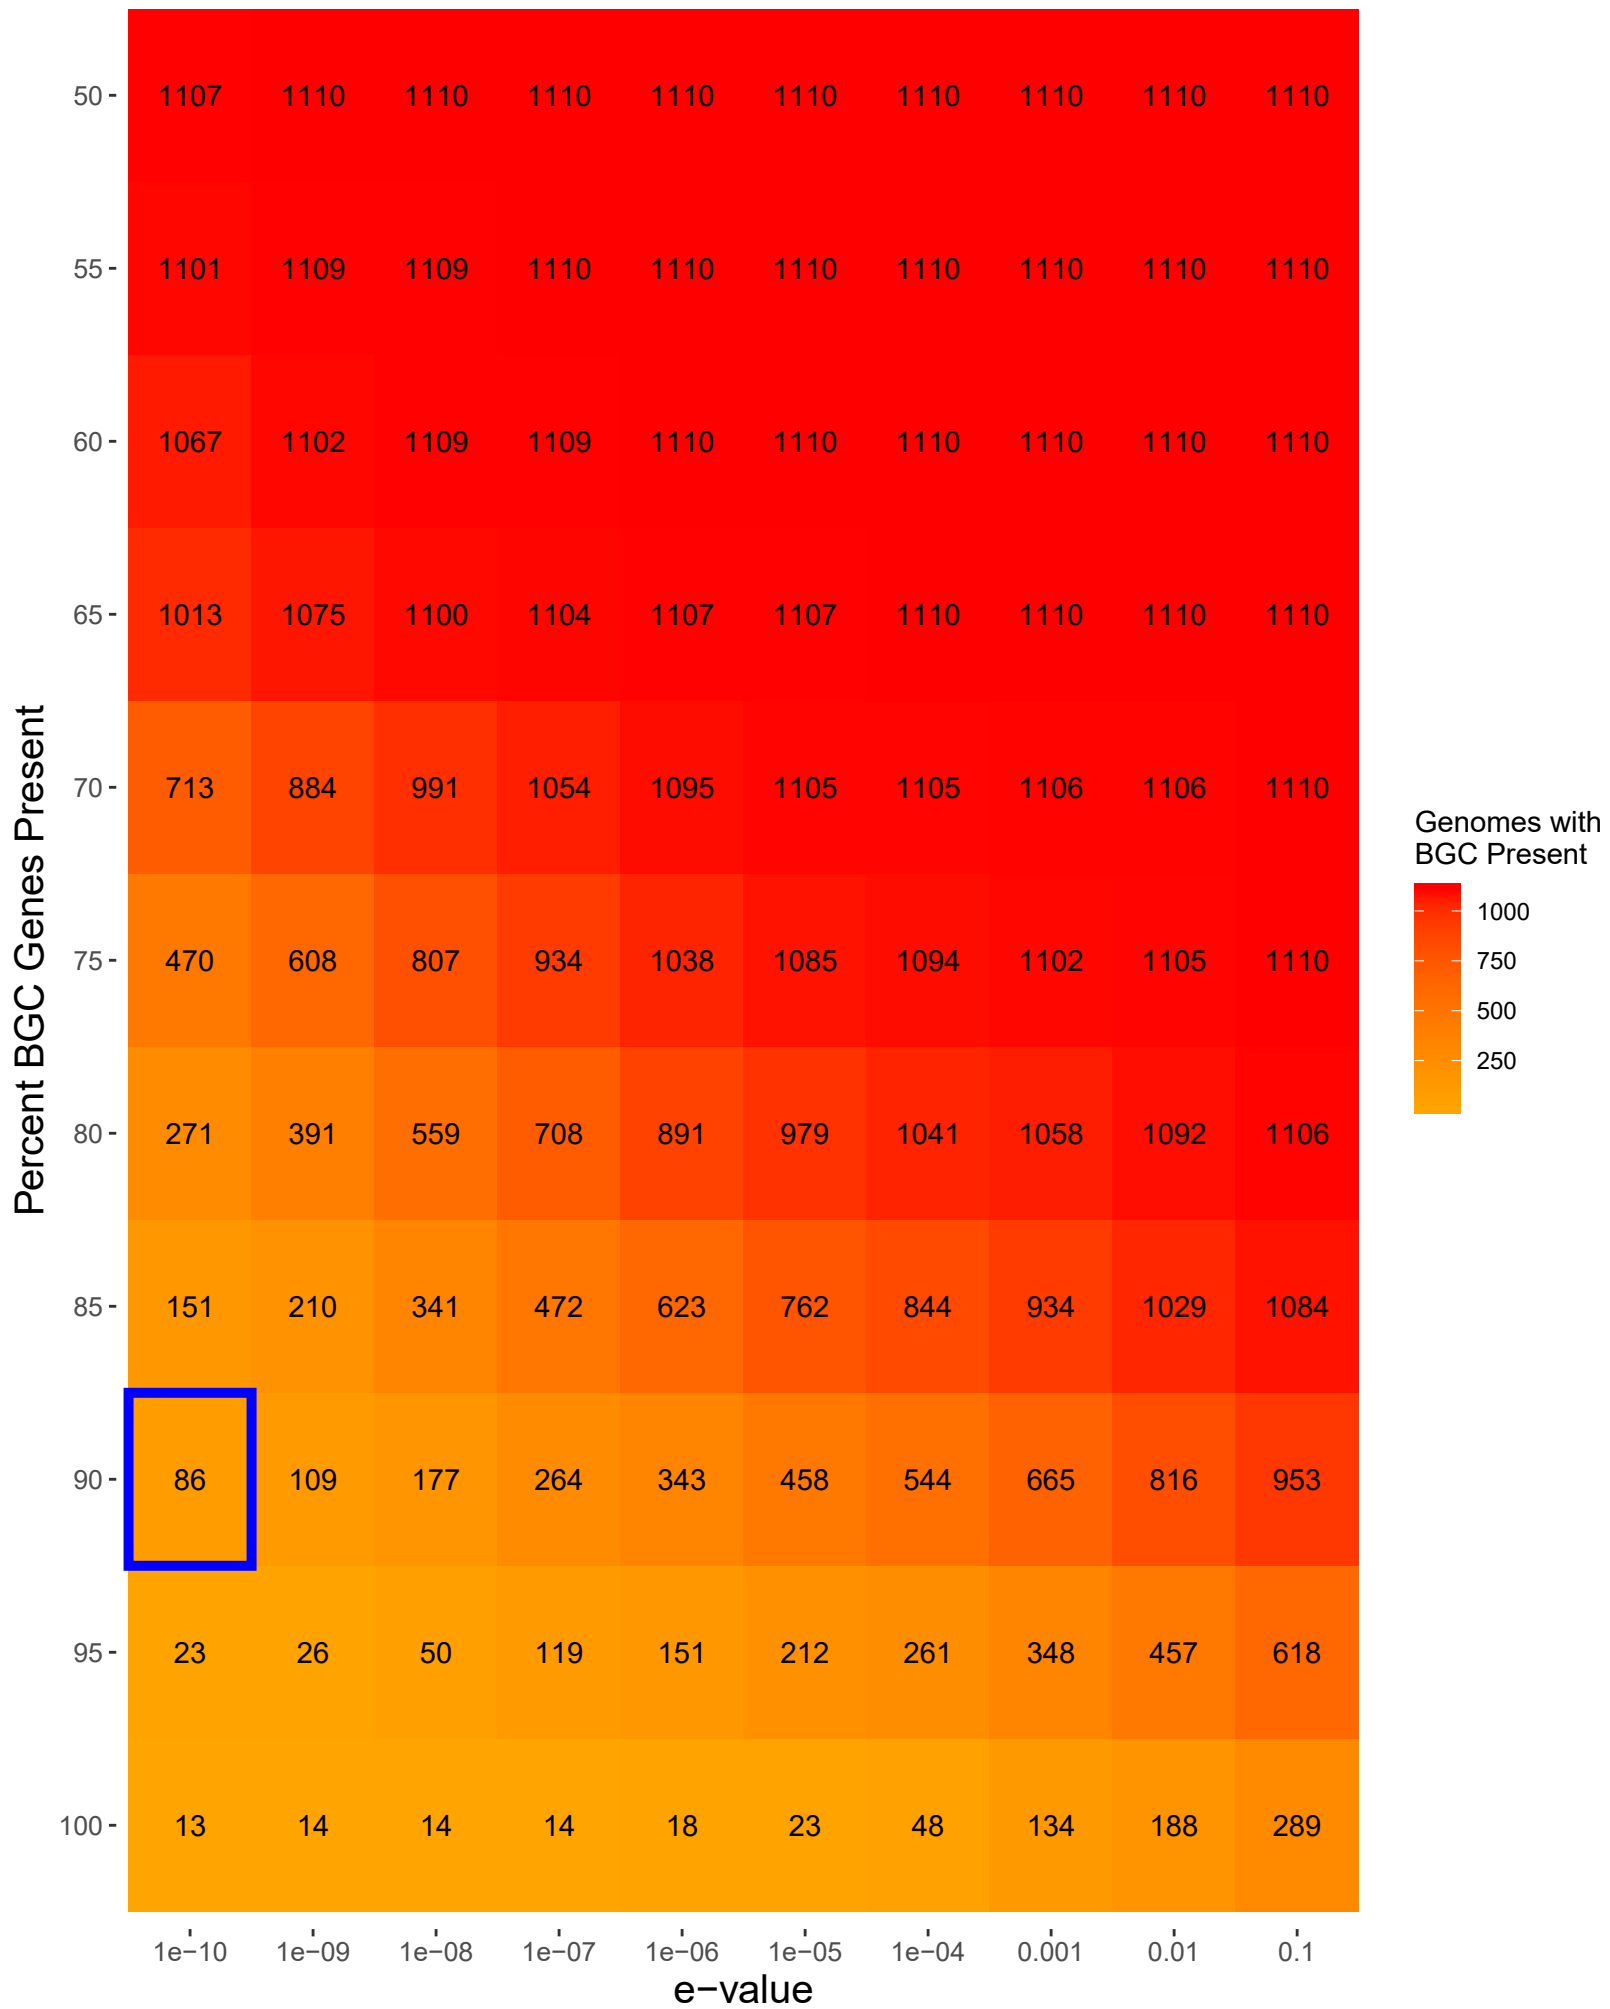

# Gilvocarcin

Percent BGC Genes Present

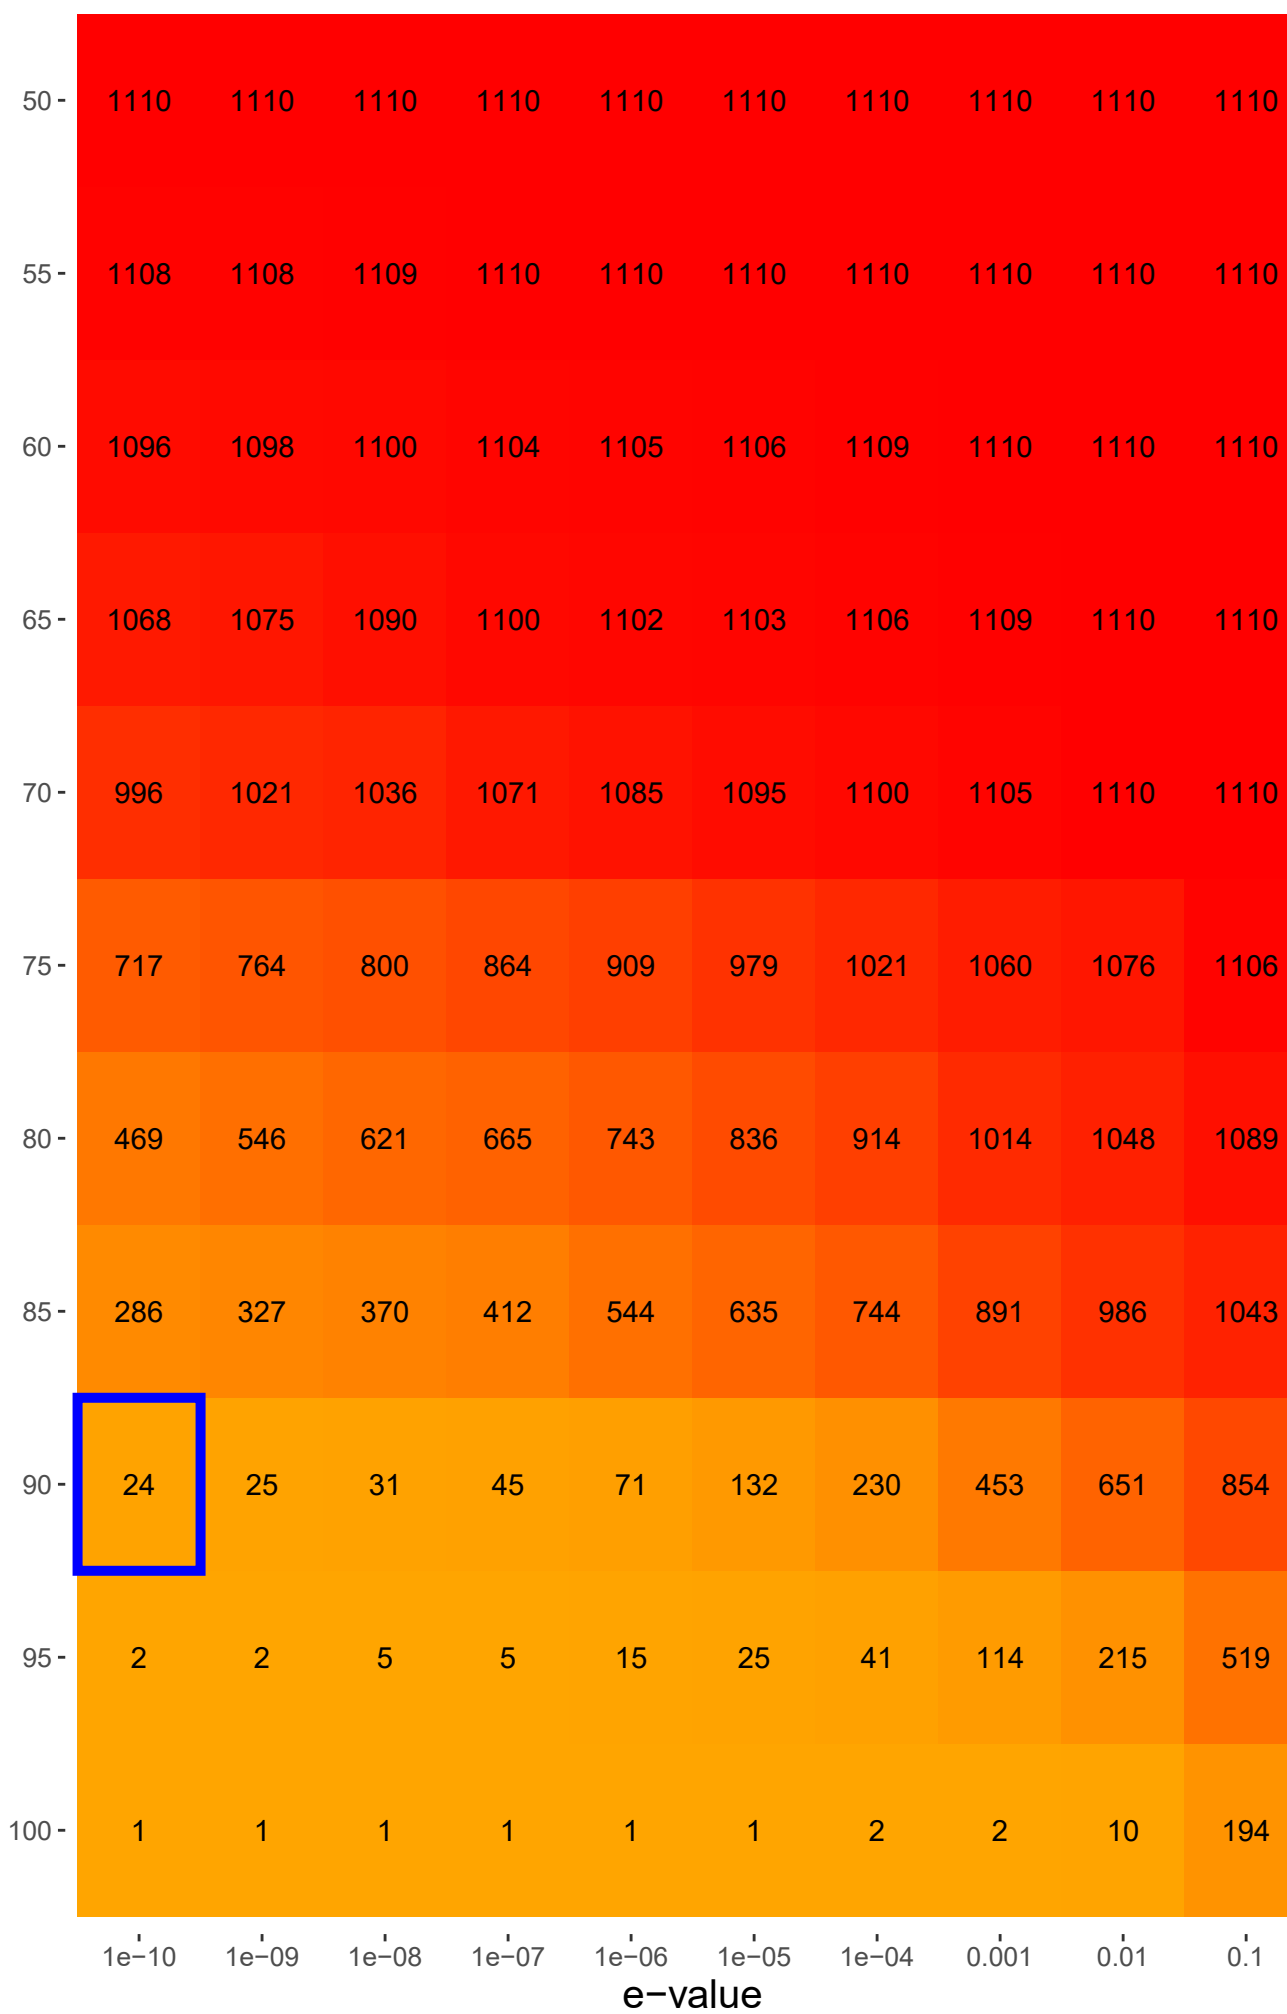

Genomes with BGC Present

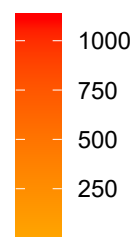

# Hedamycin

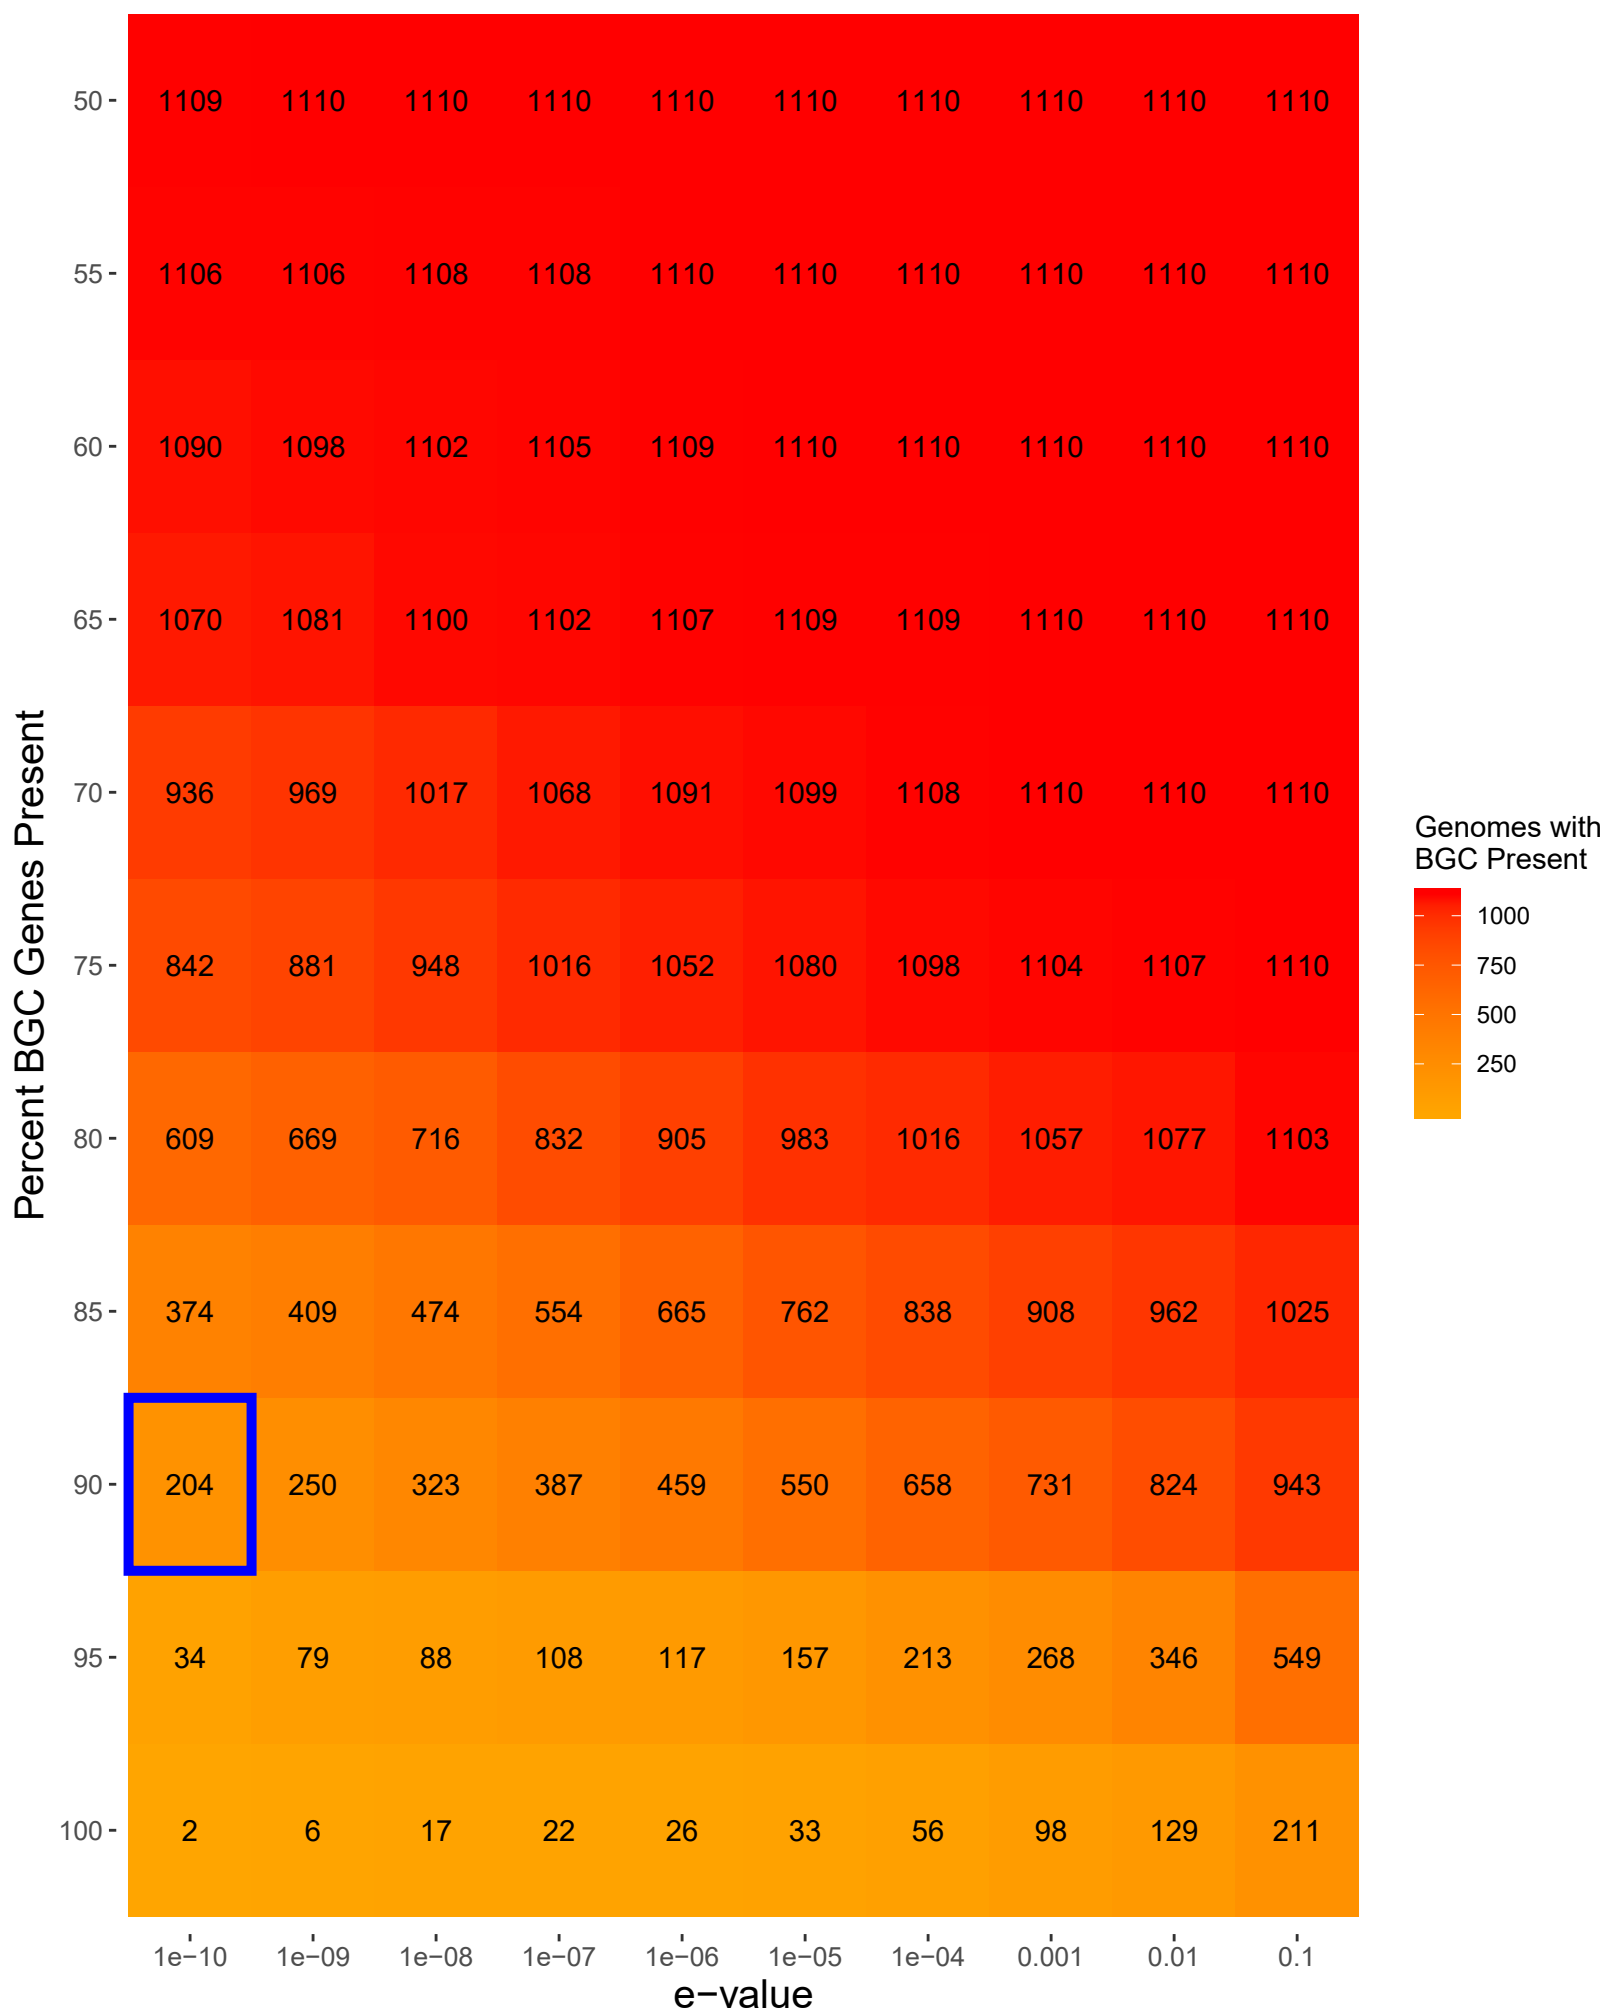

# Herbimycin\_A

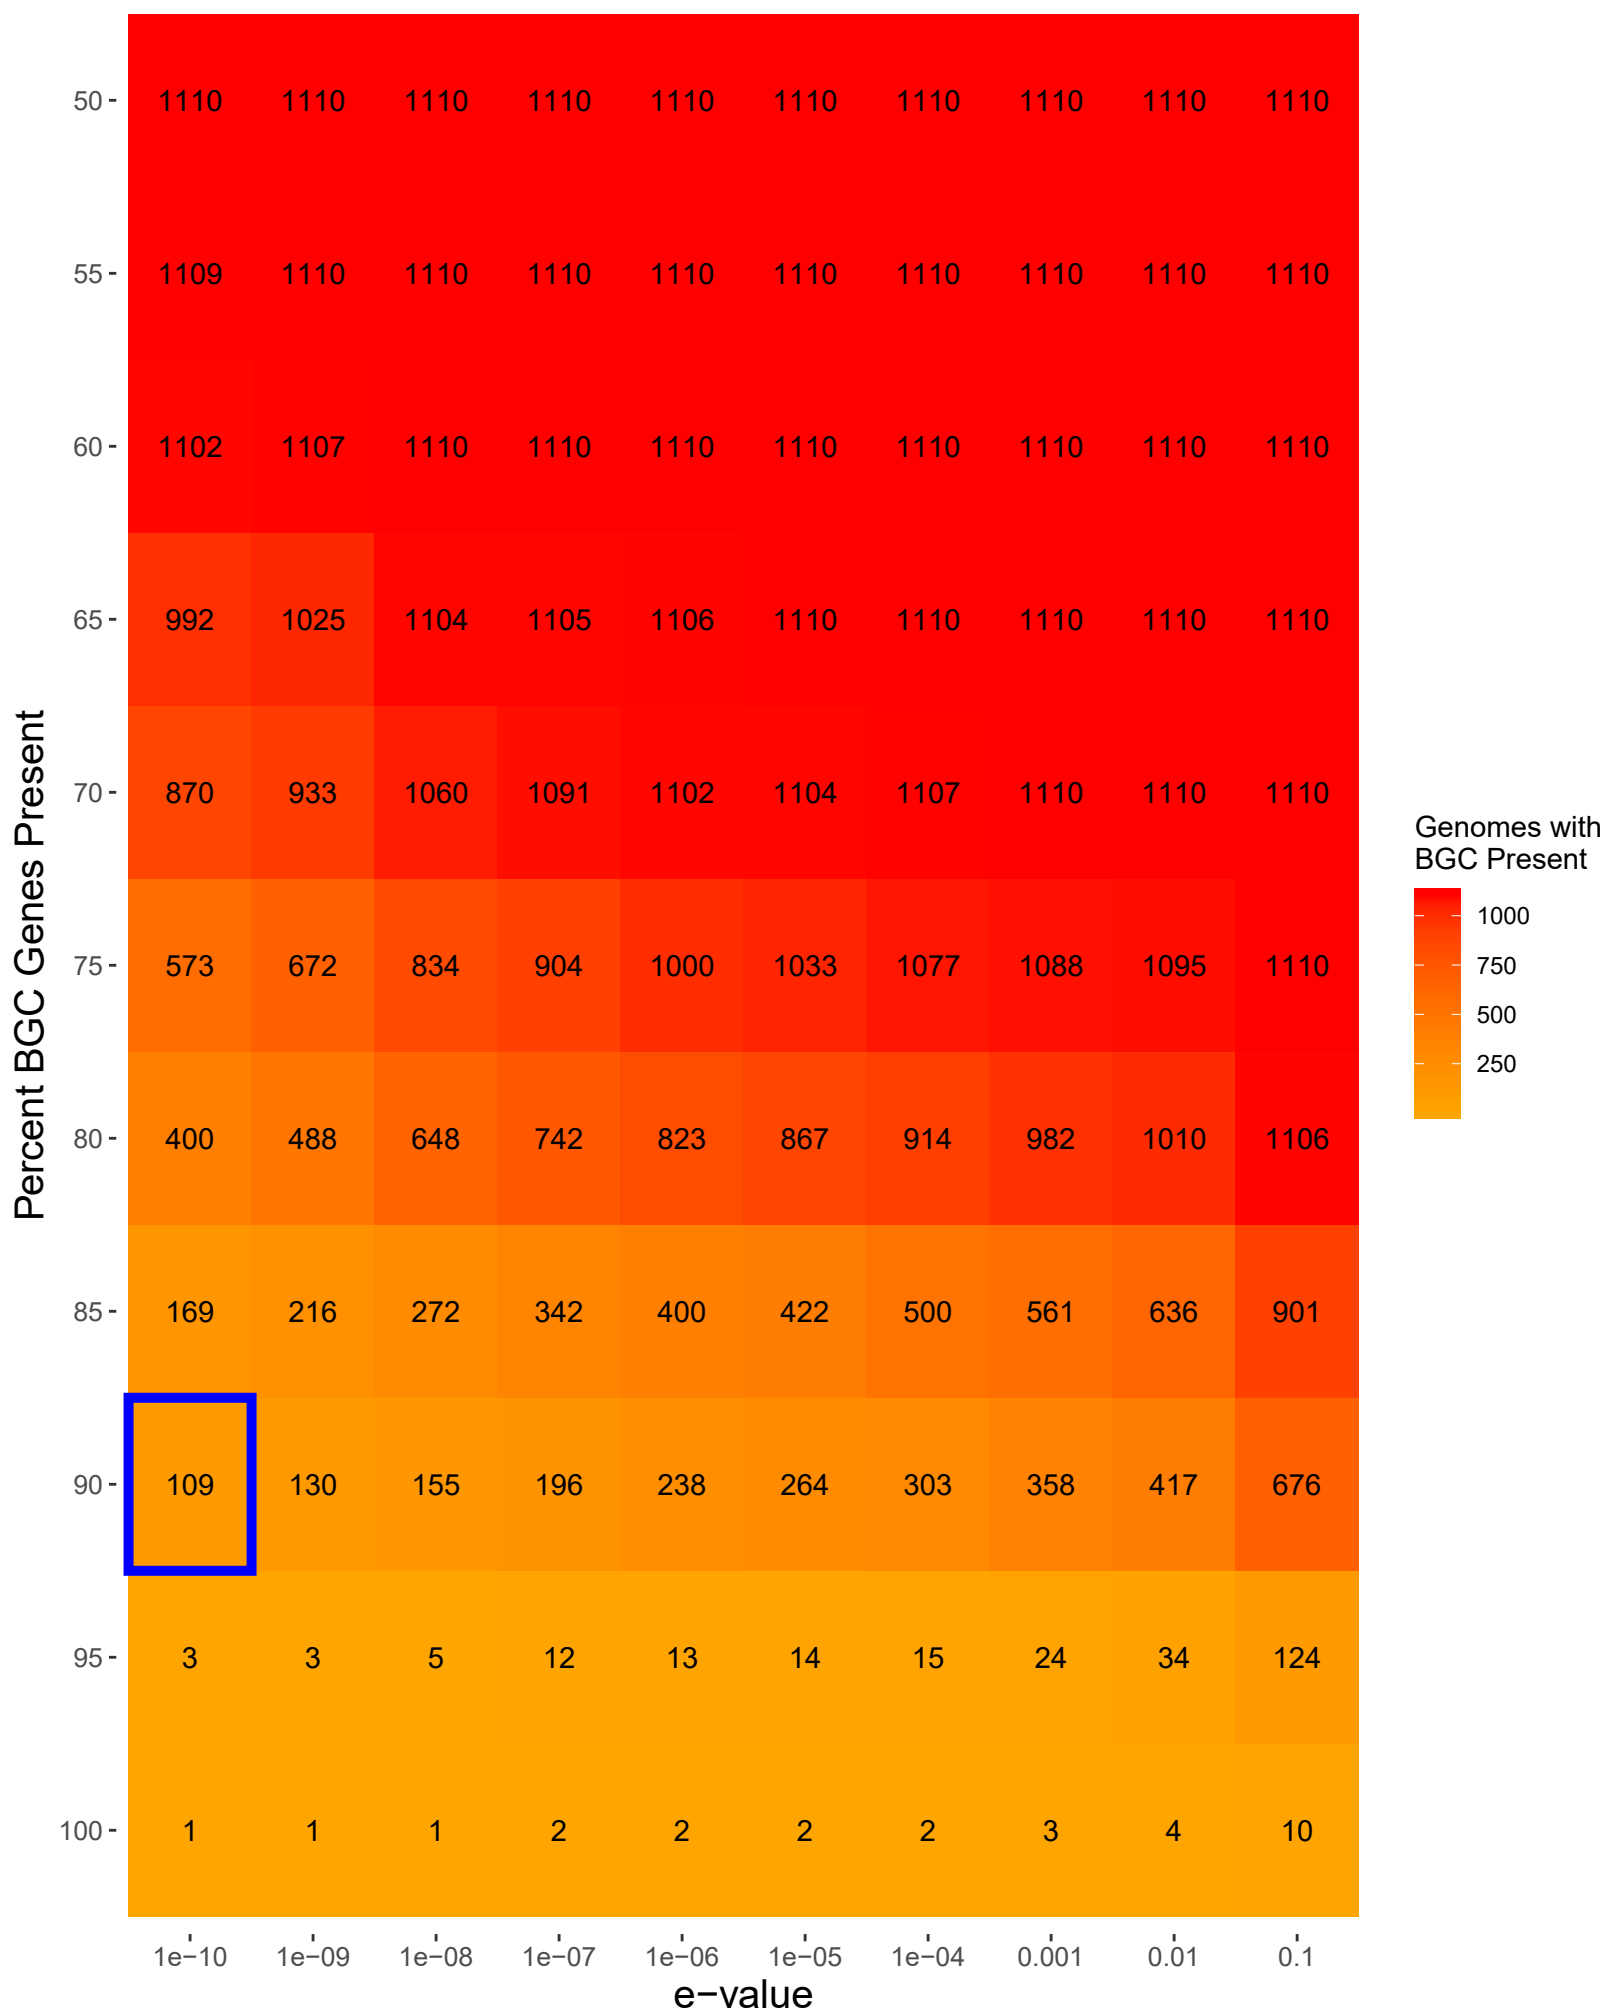

# Landomycin

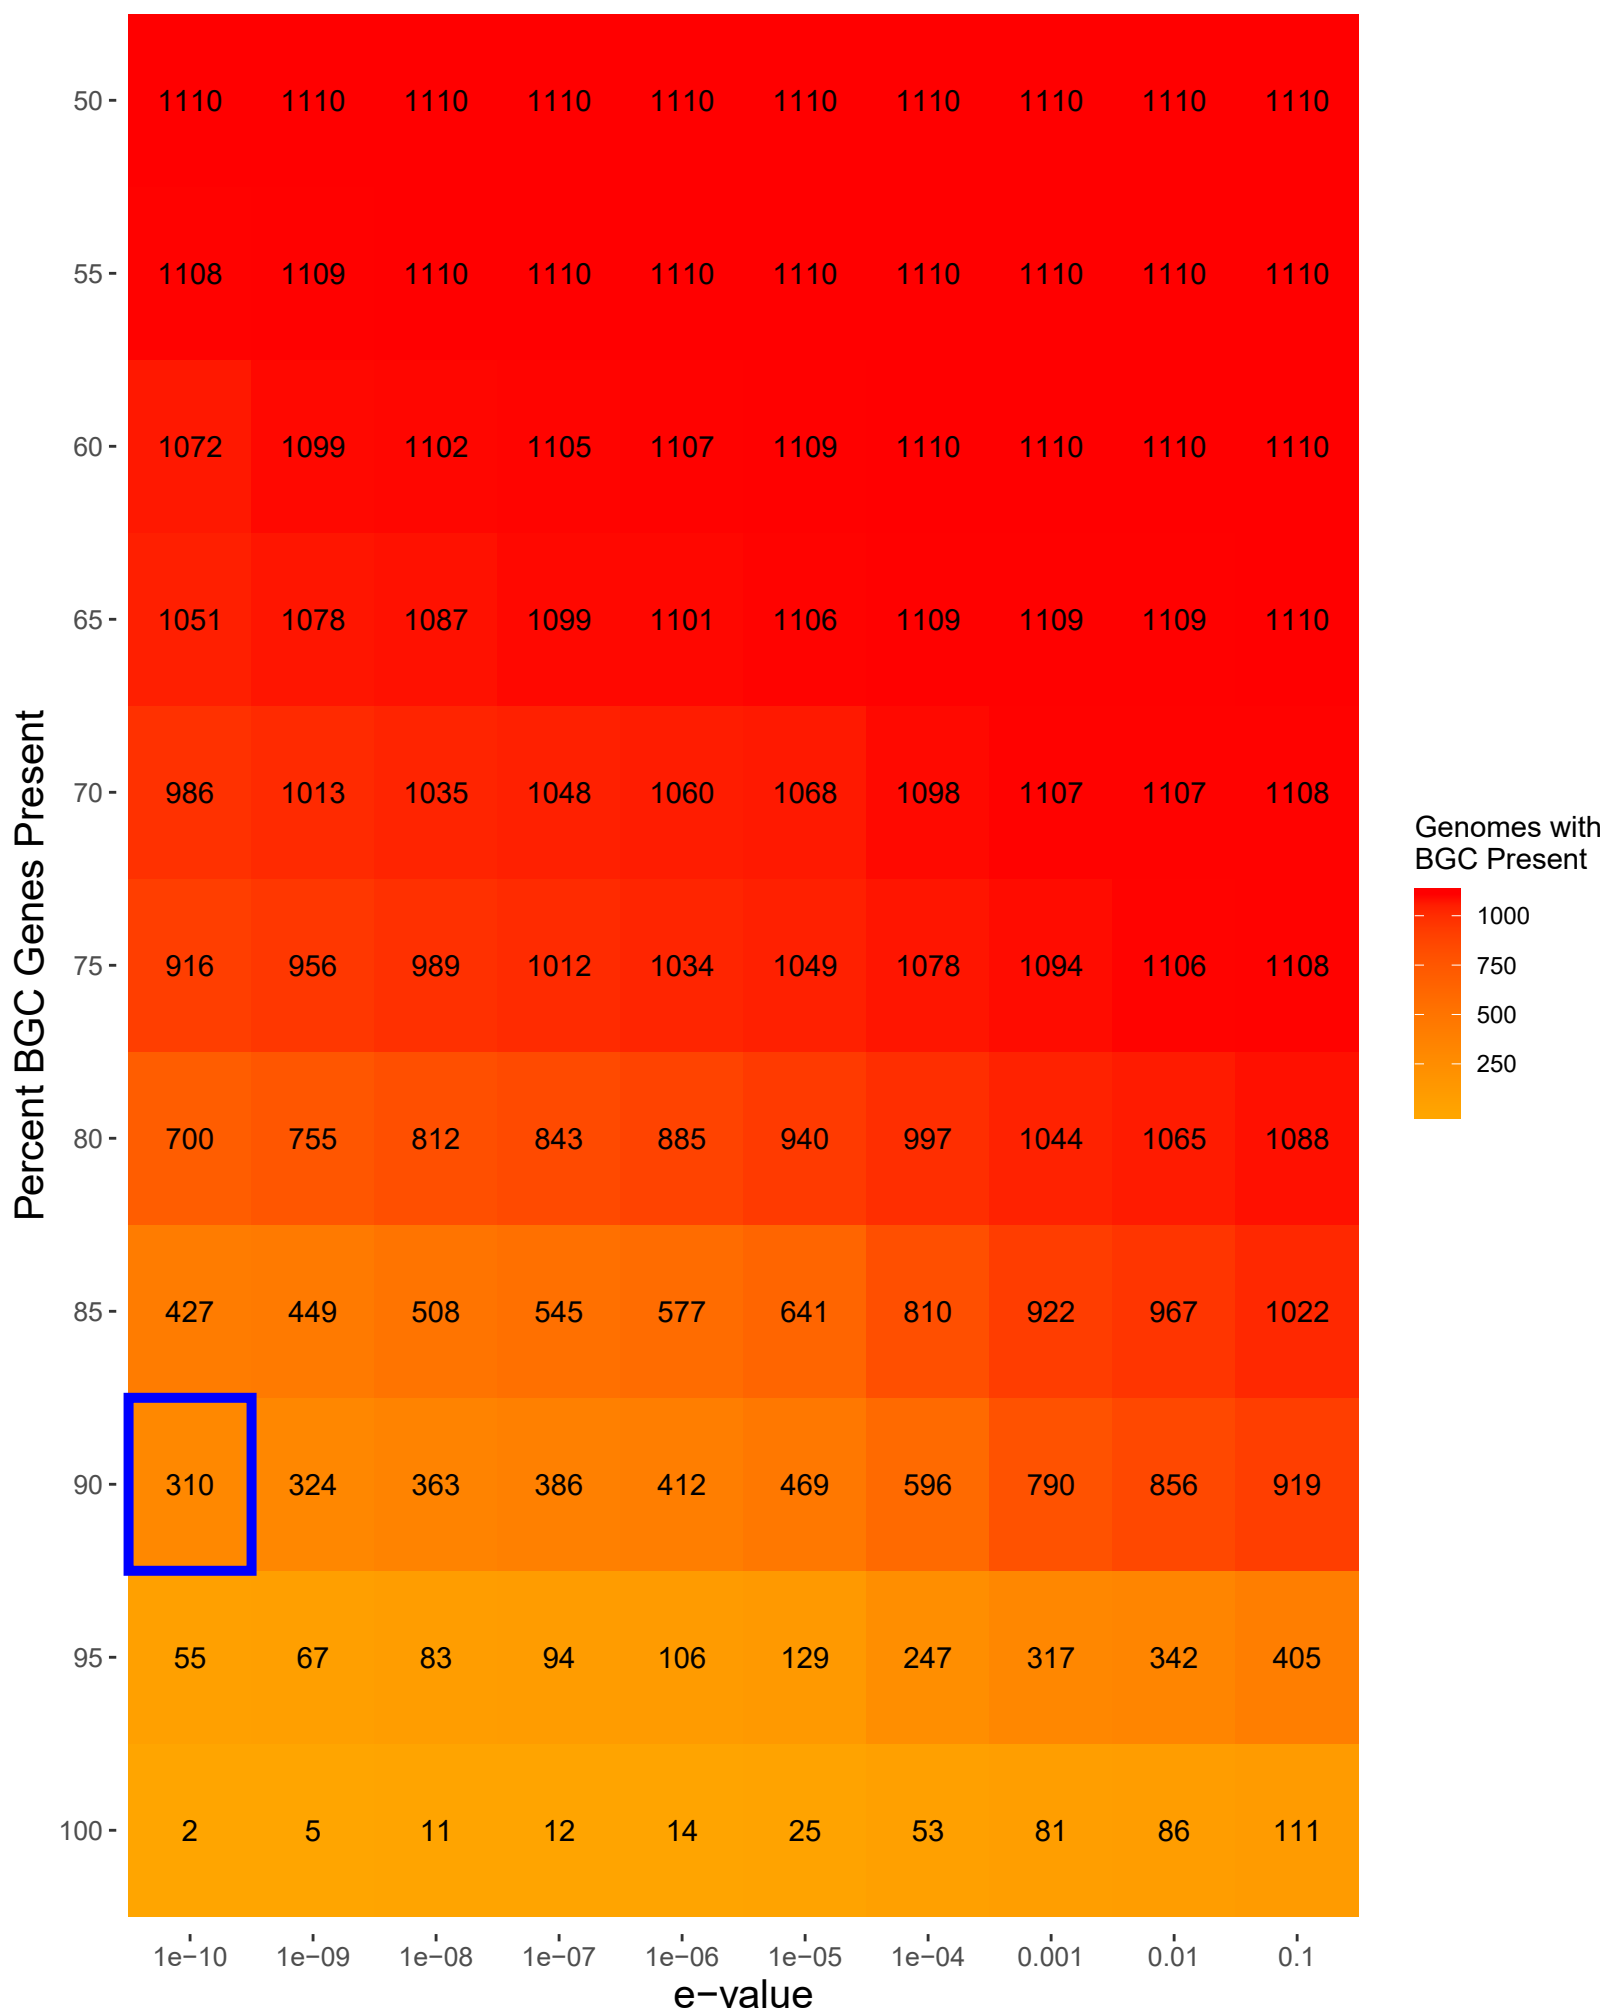

# Medermycin

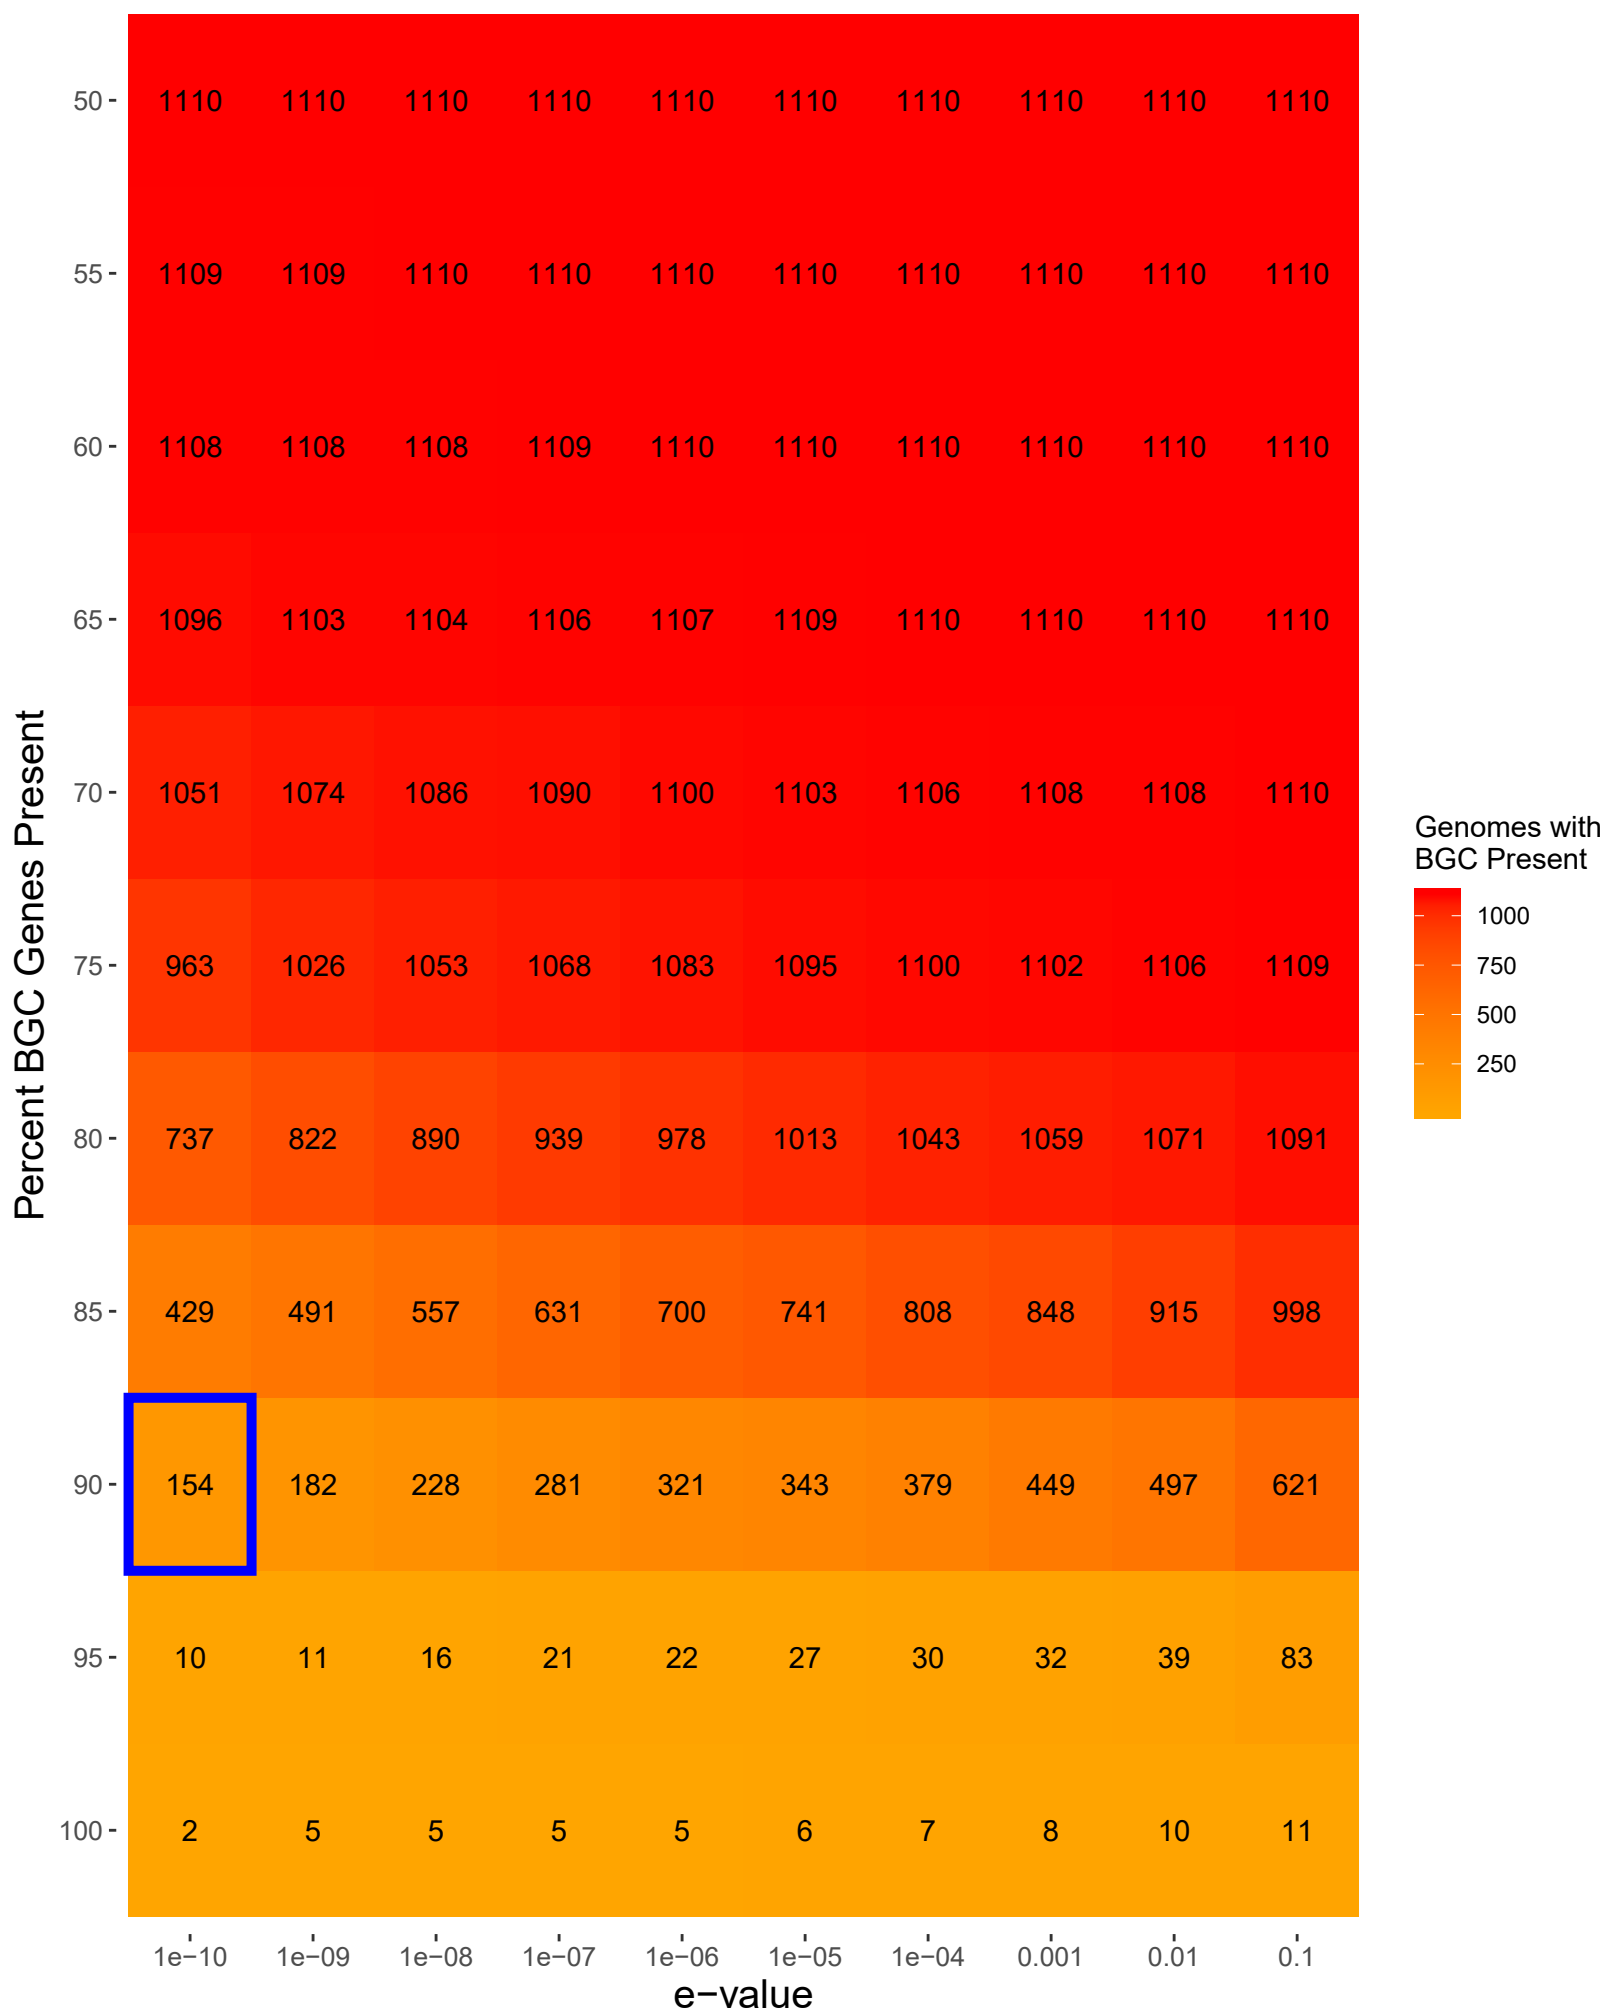

# Mithramycin

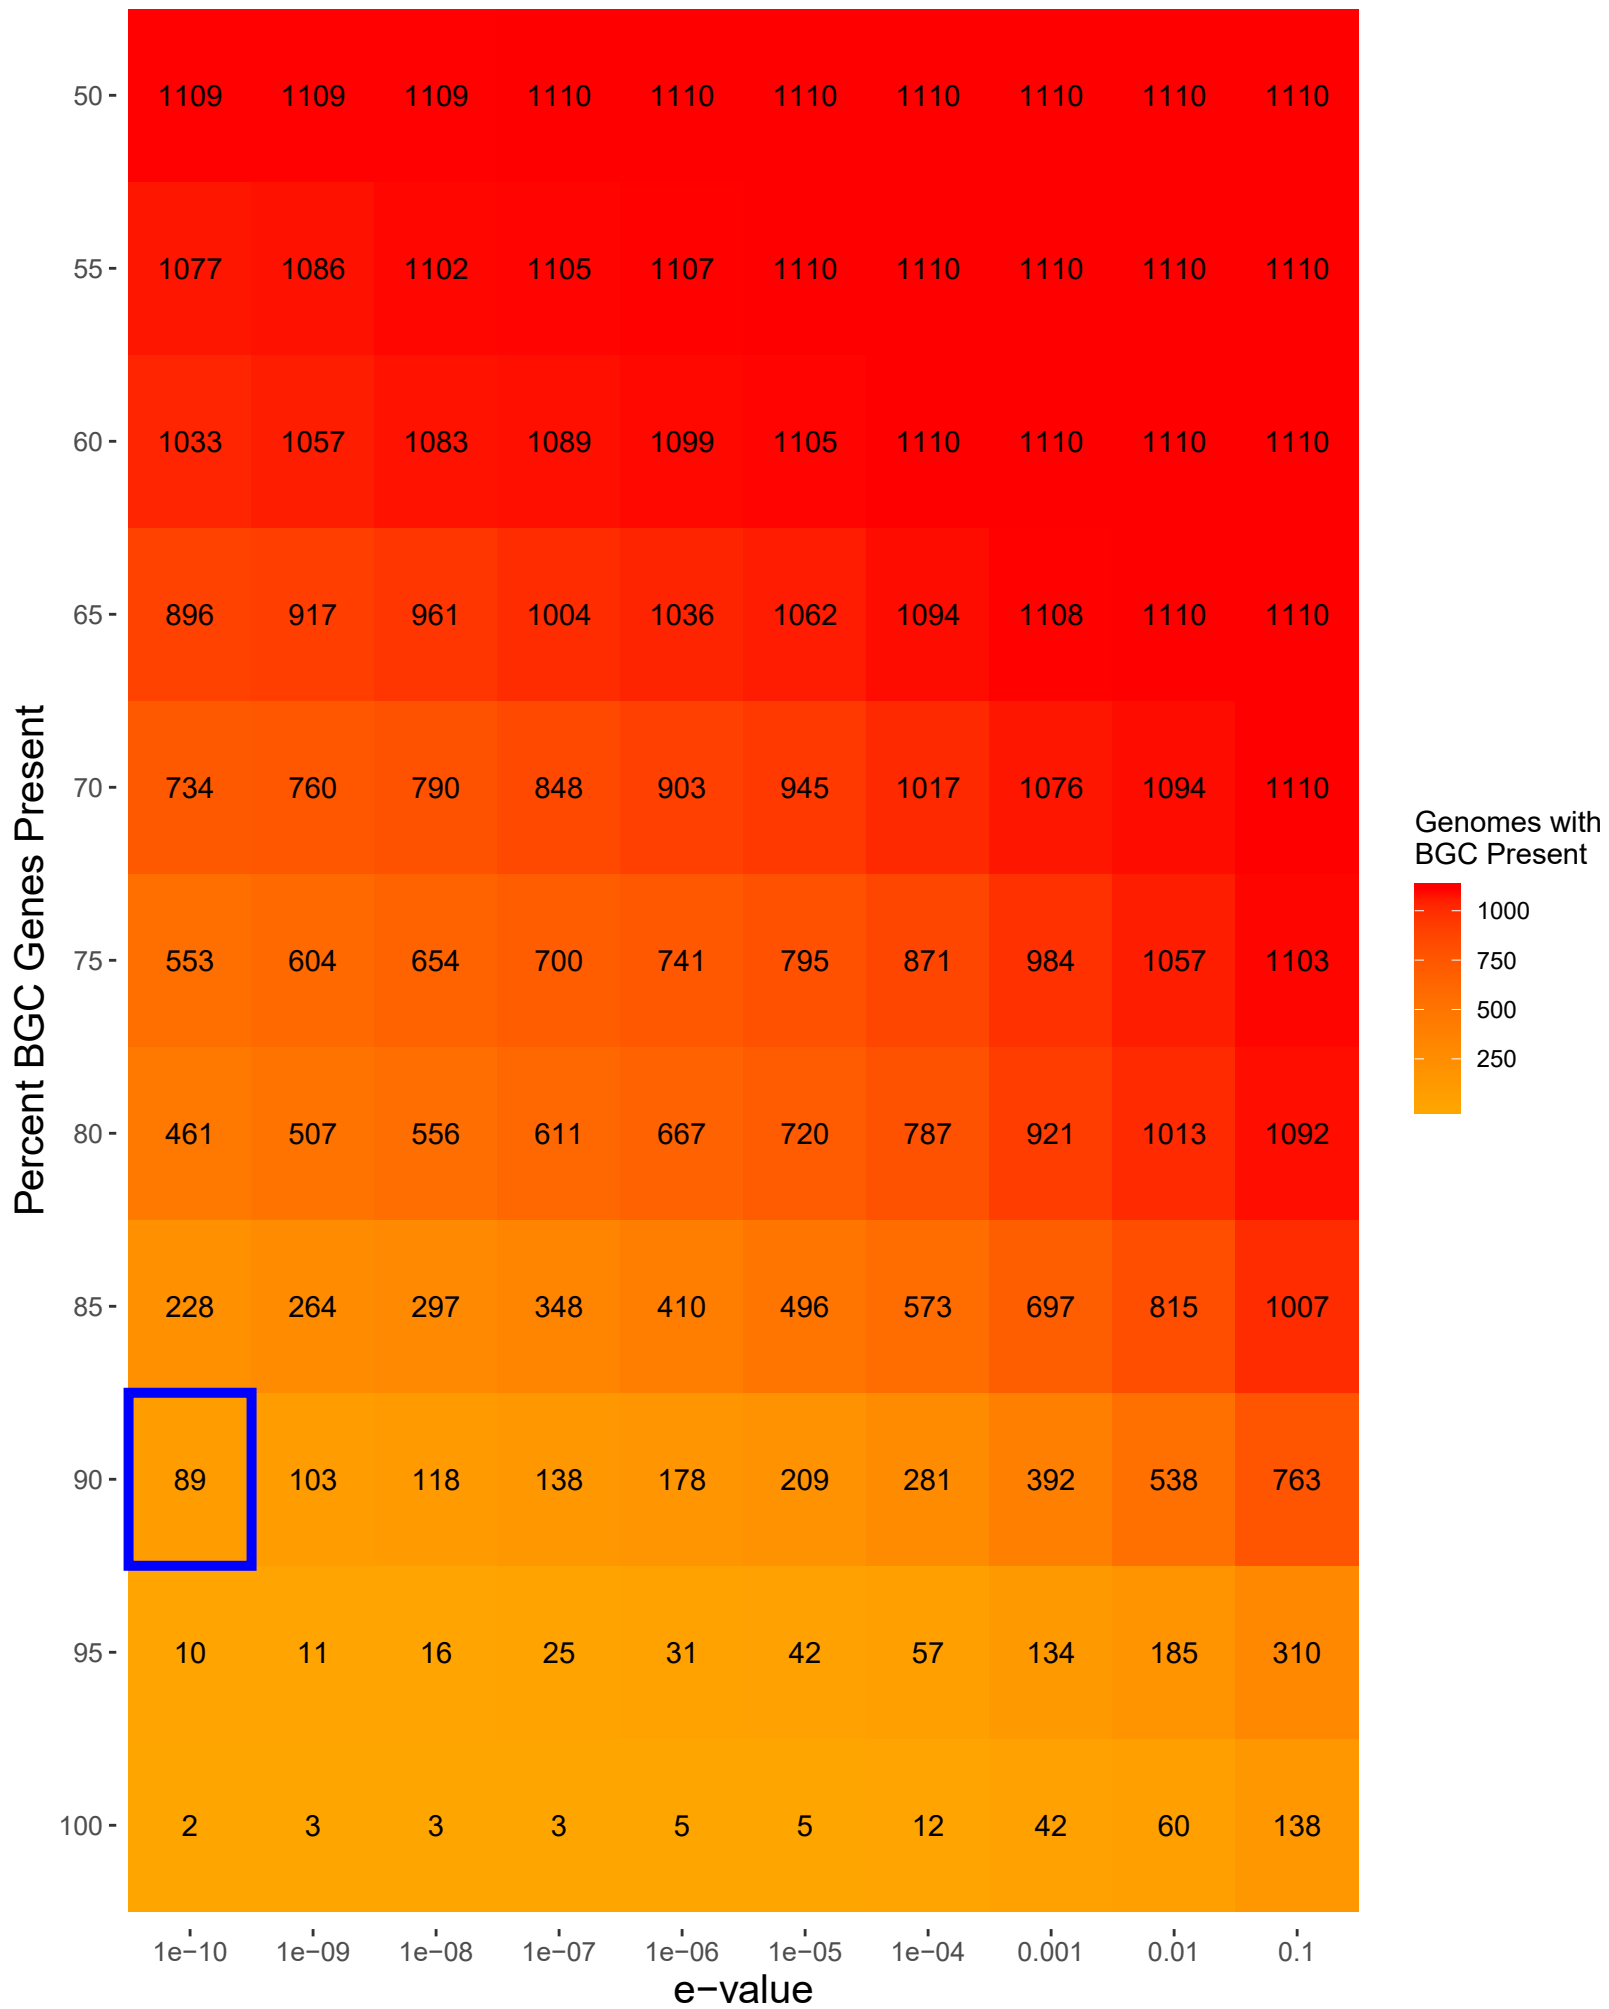







# Oligomycin

Percent BGC Genes Present

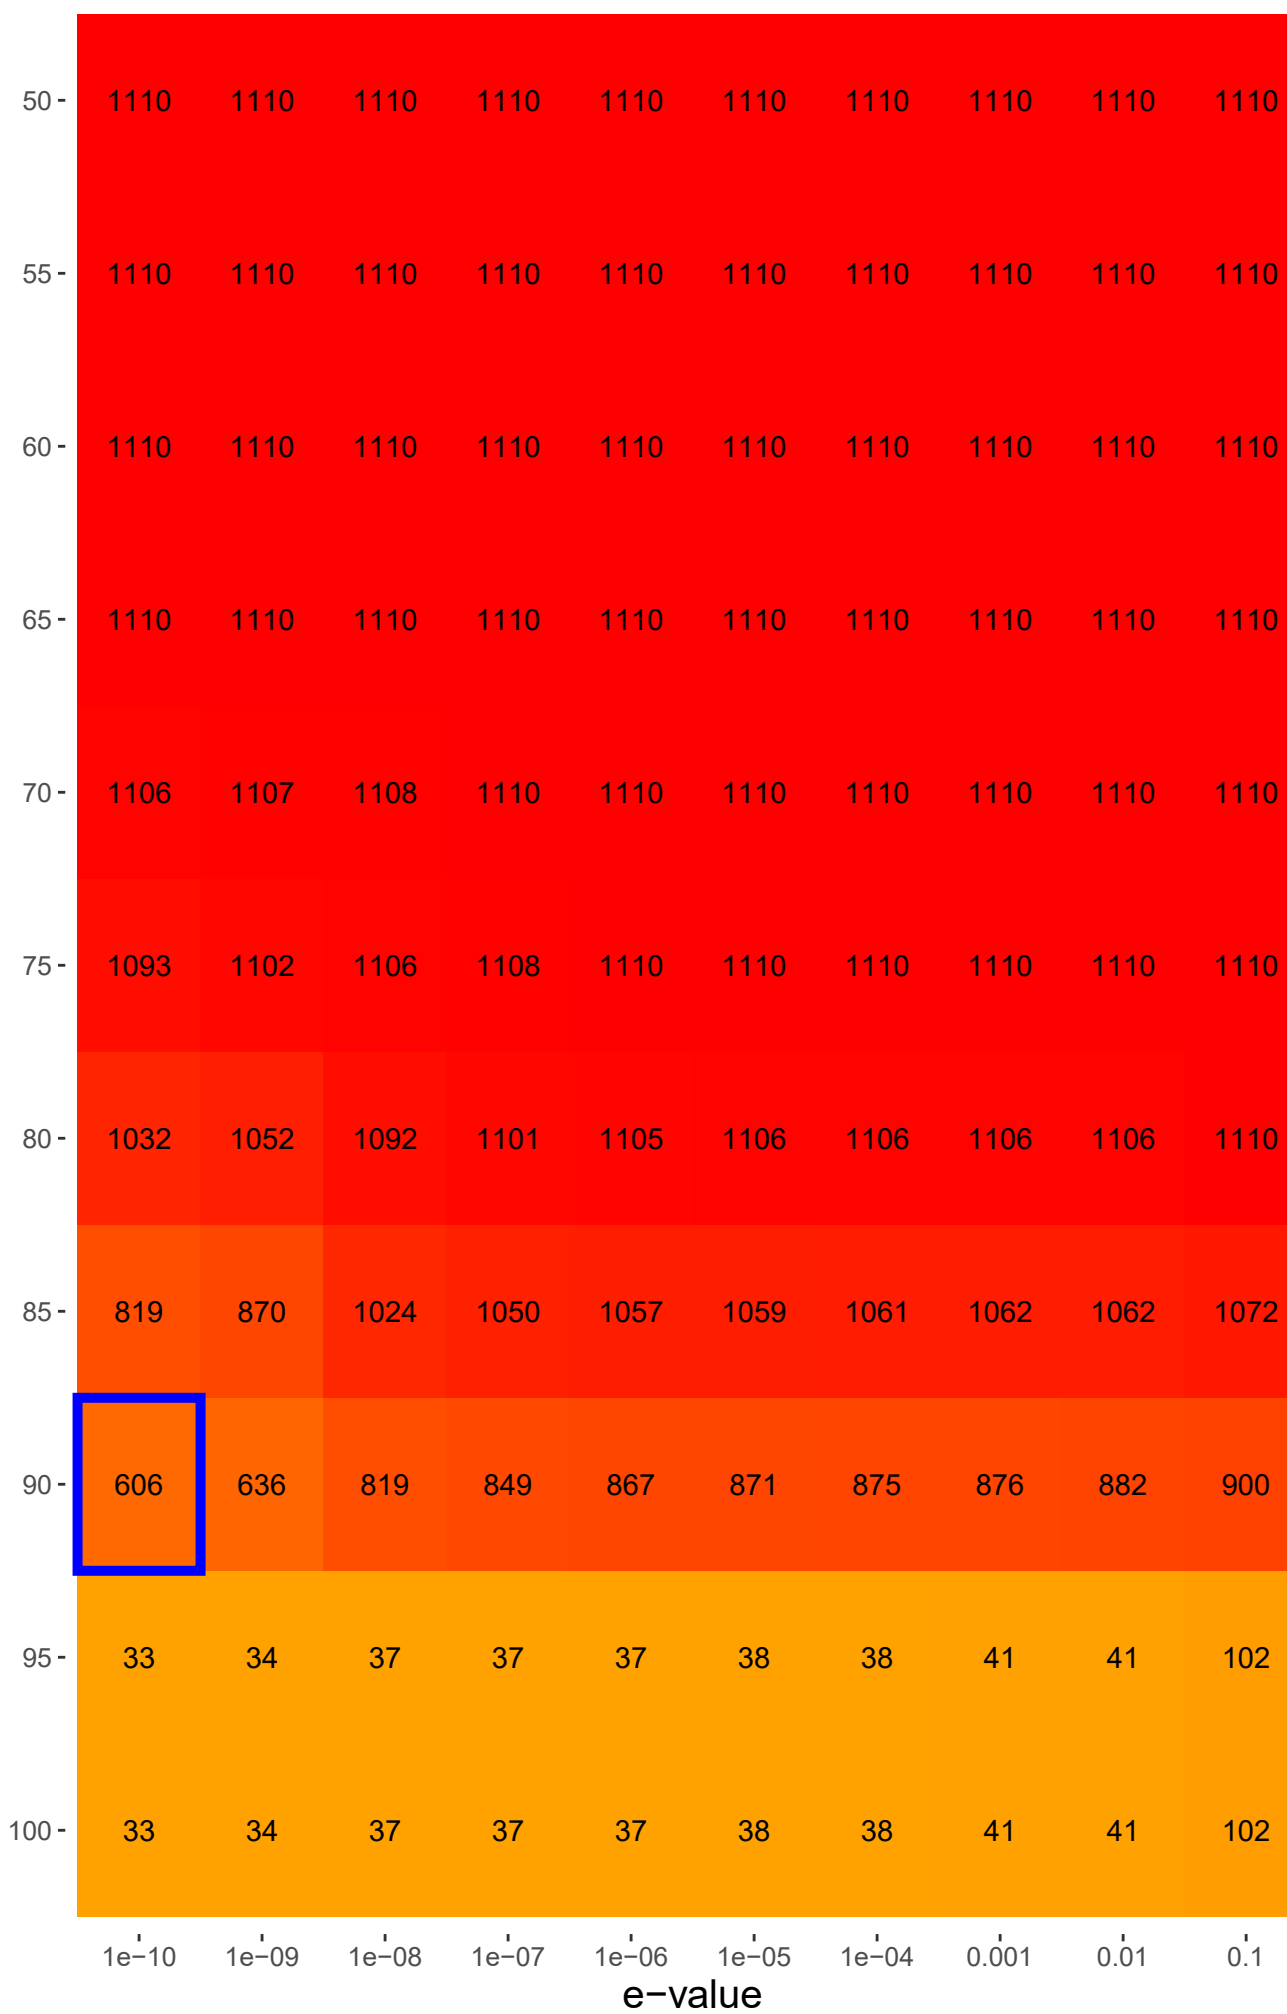

Genomes with BGC Present

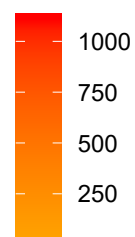



# Oxazolomycin

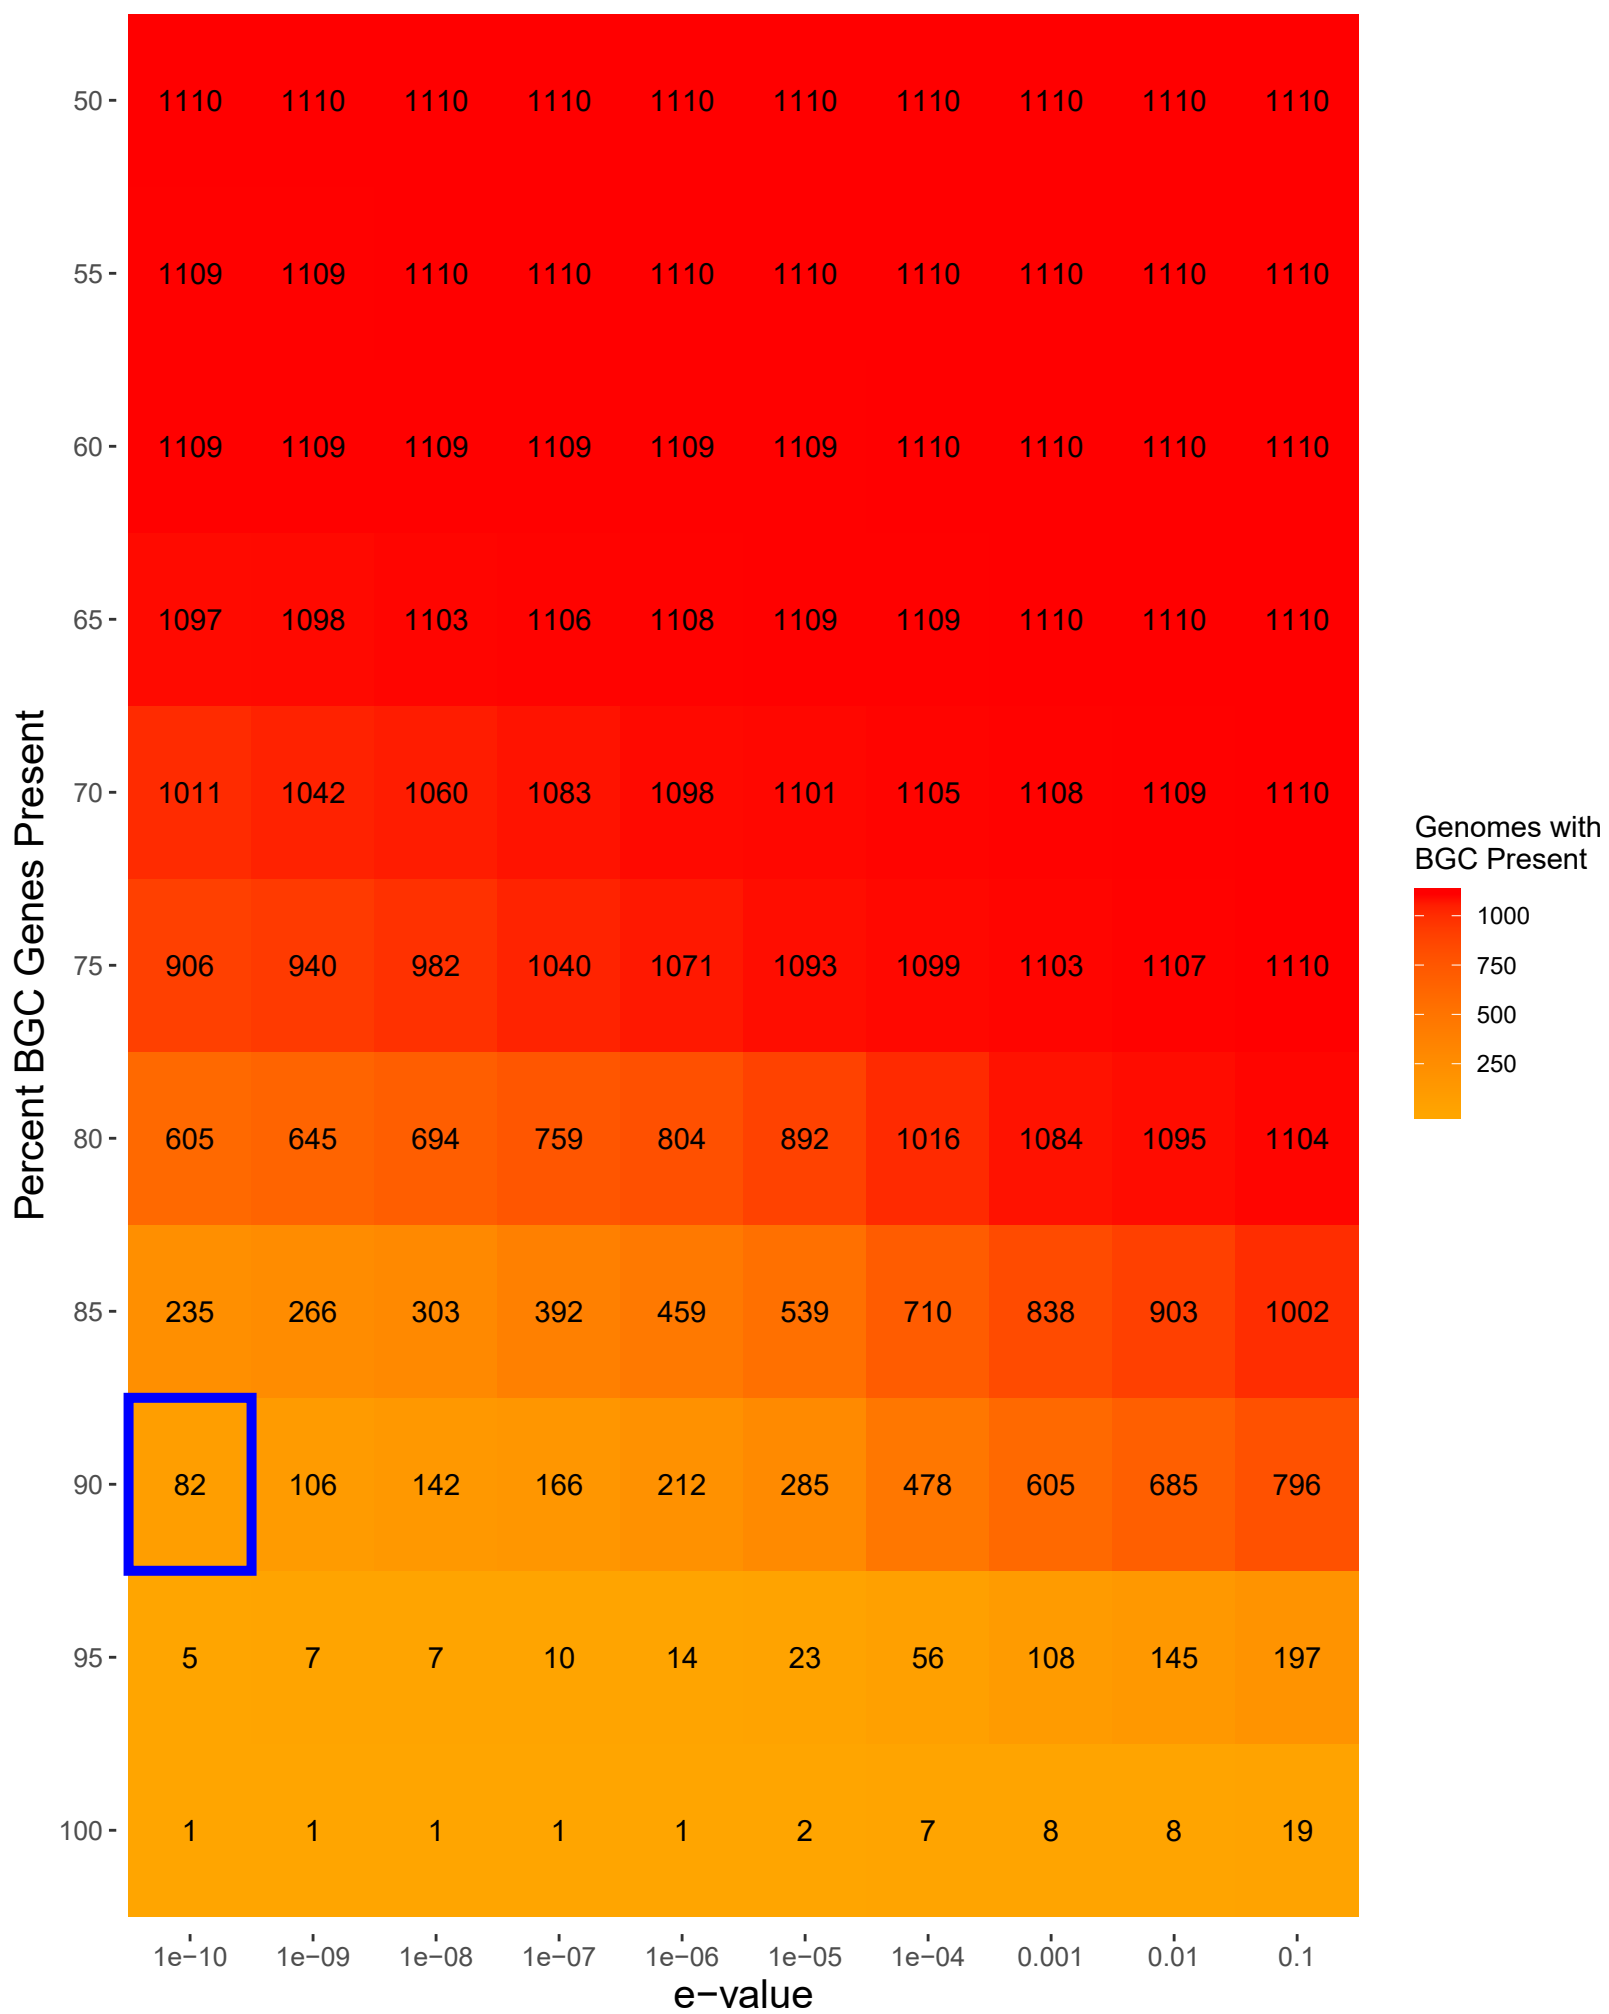

# Pactamycin

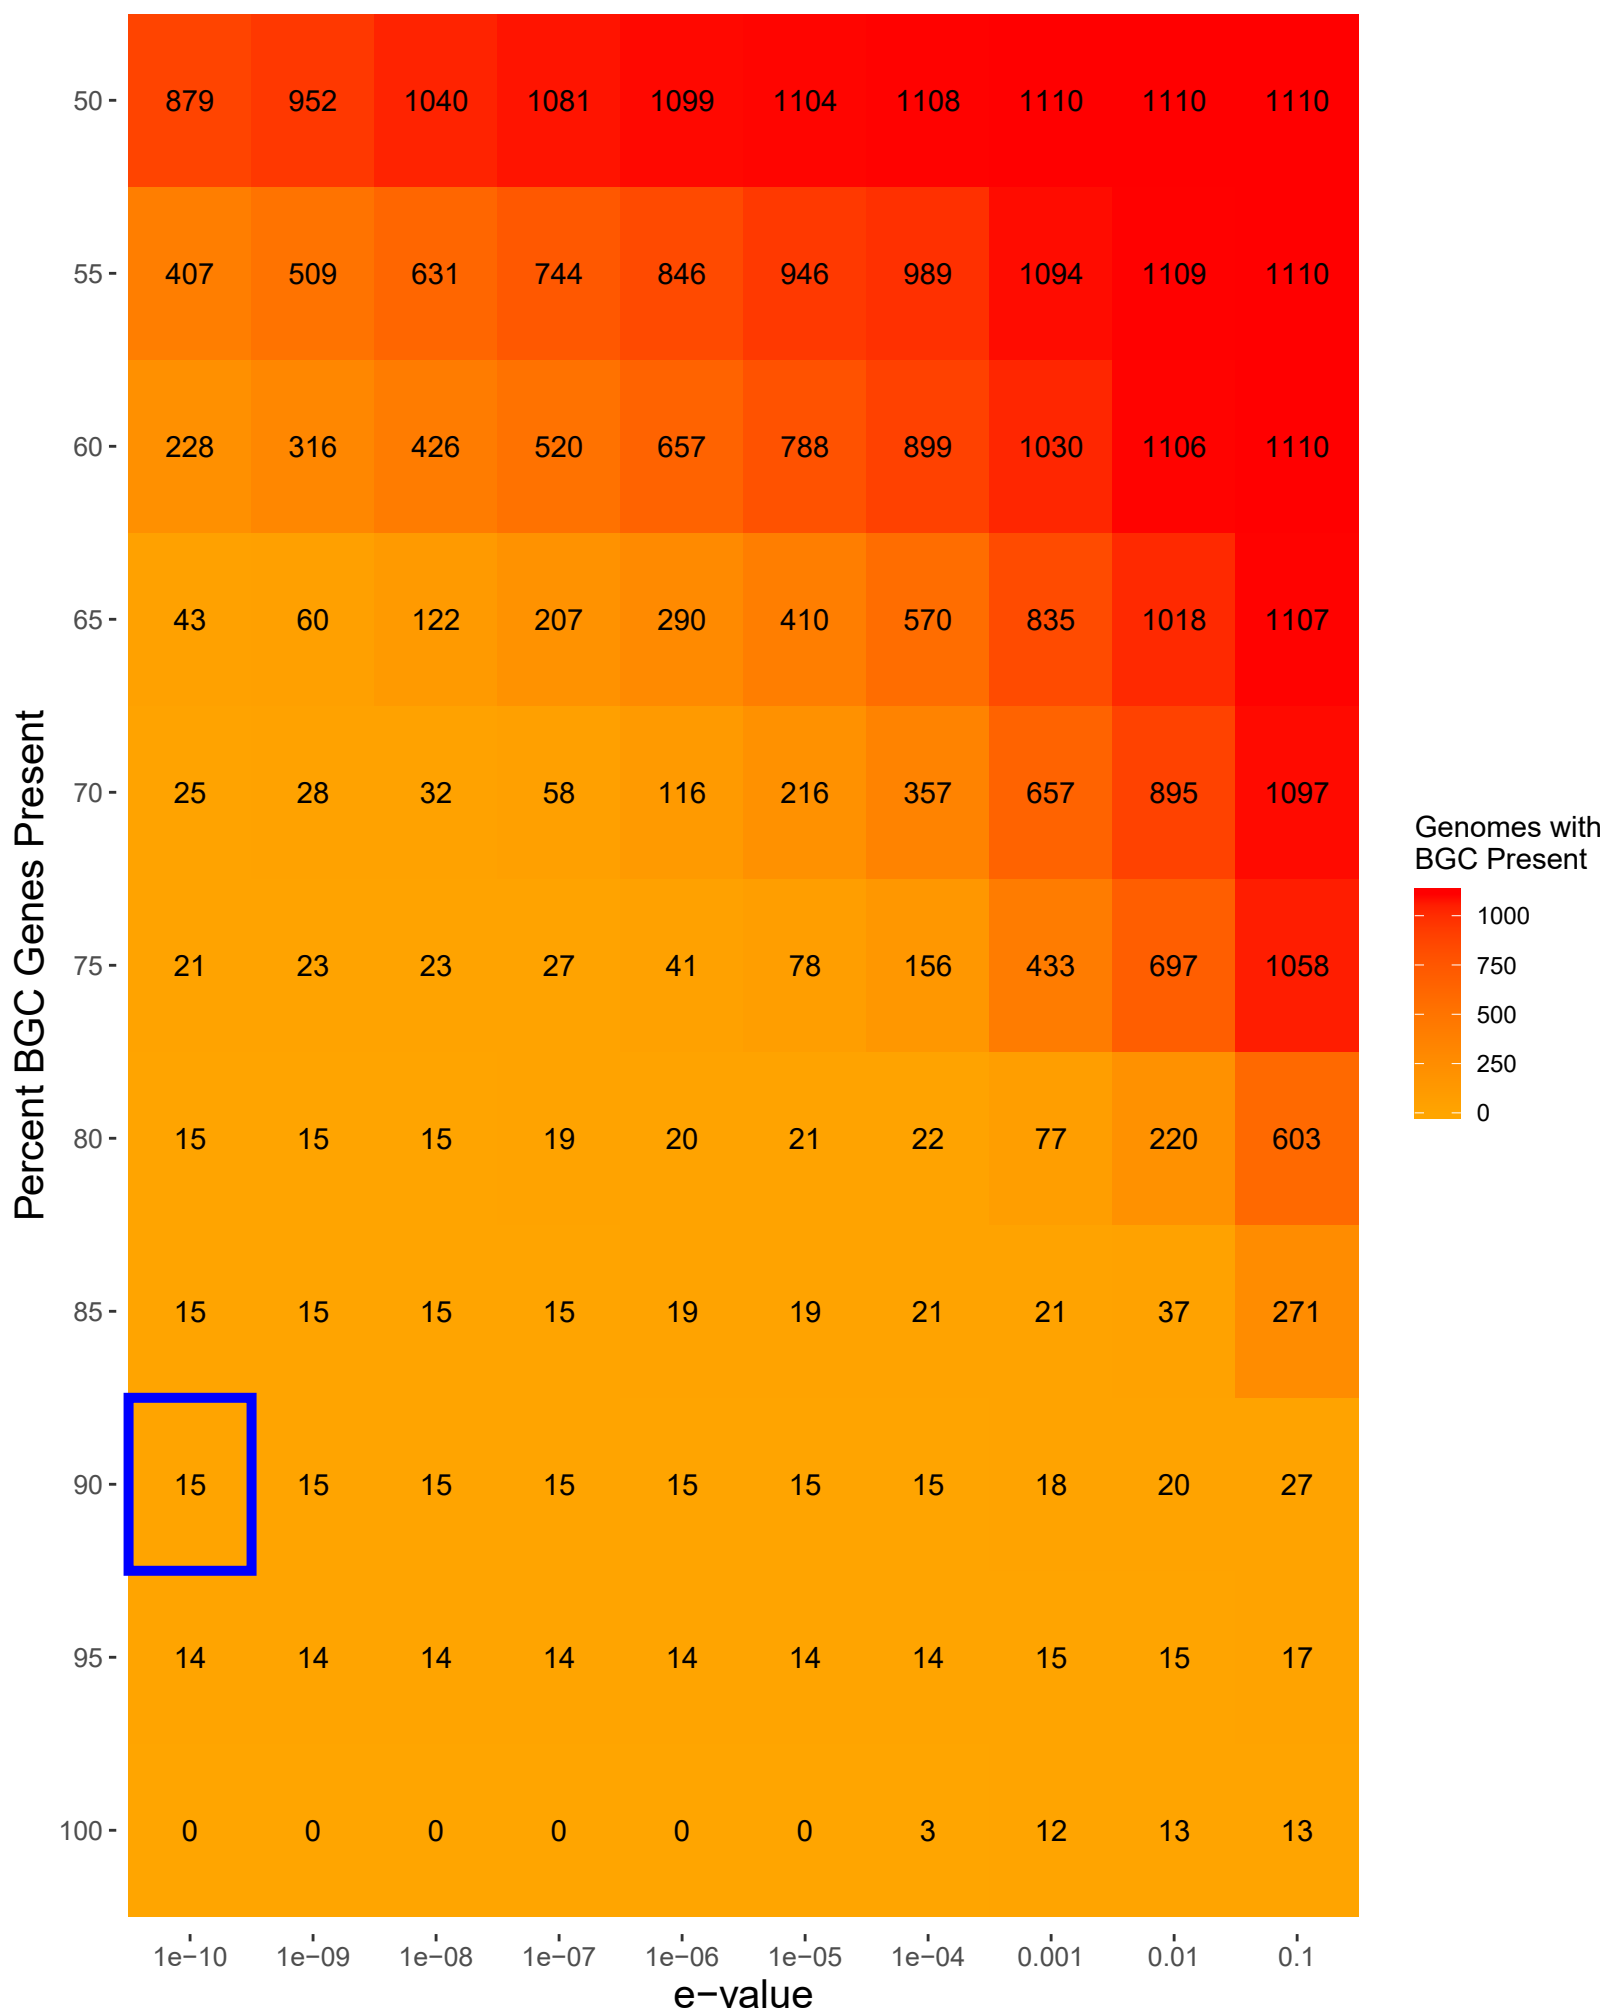

# Phoslactomycin

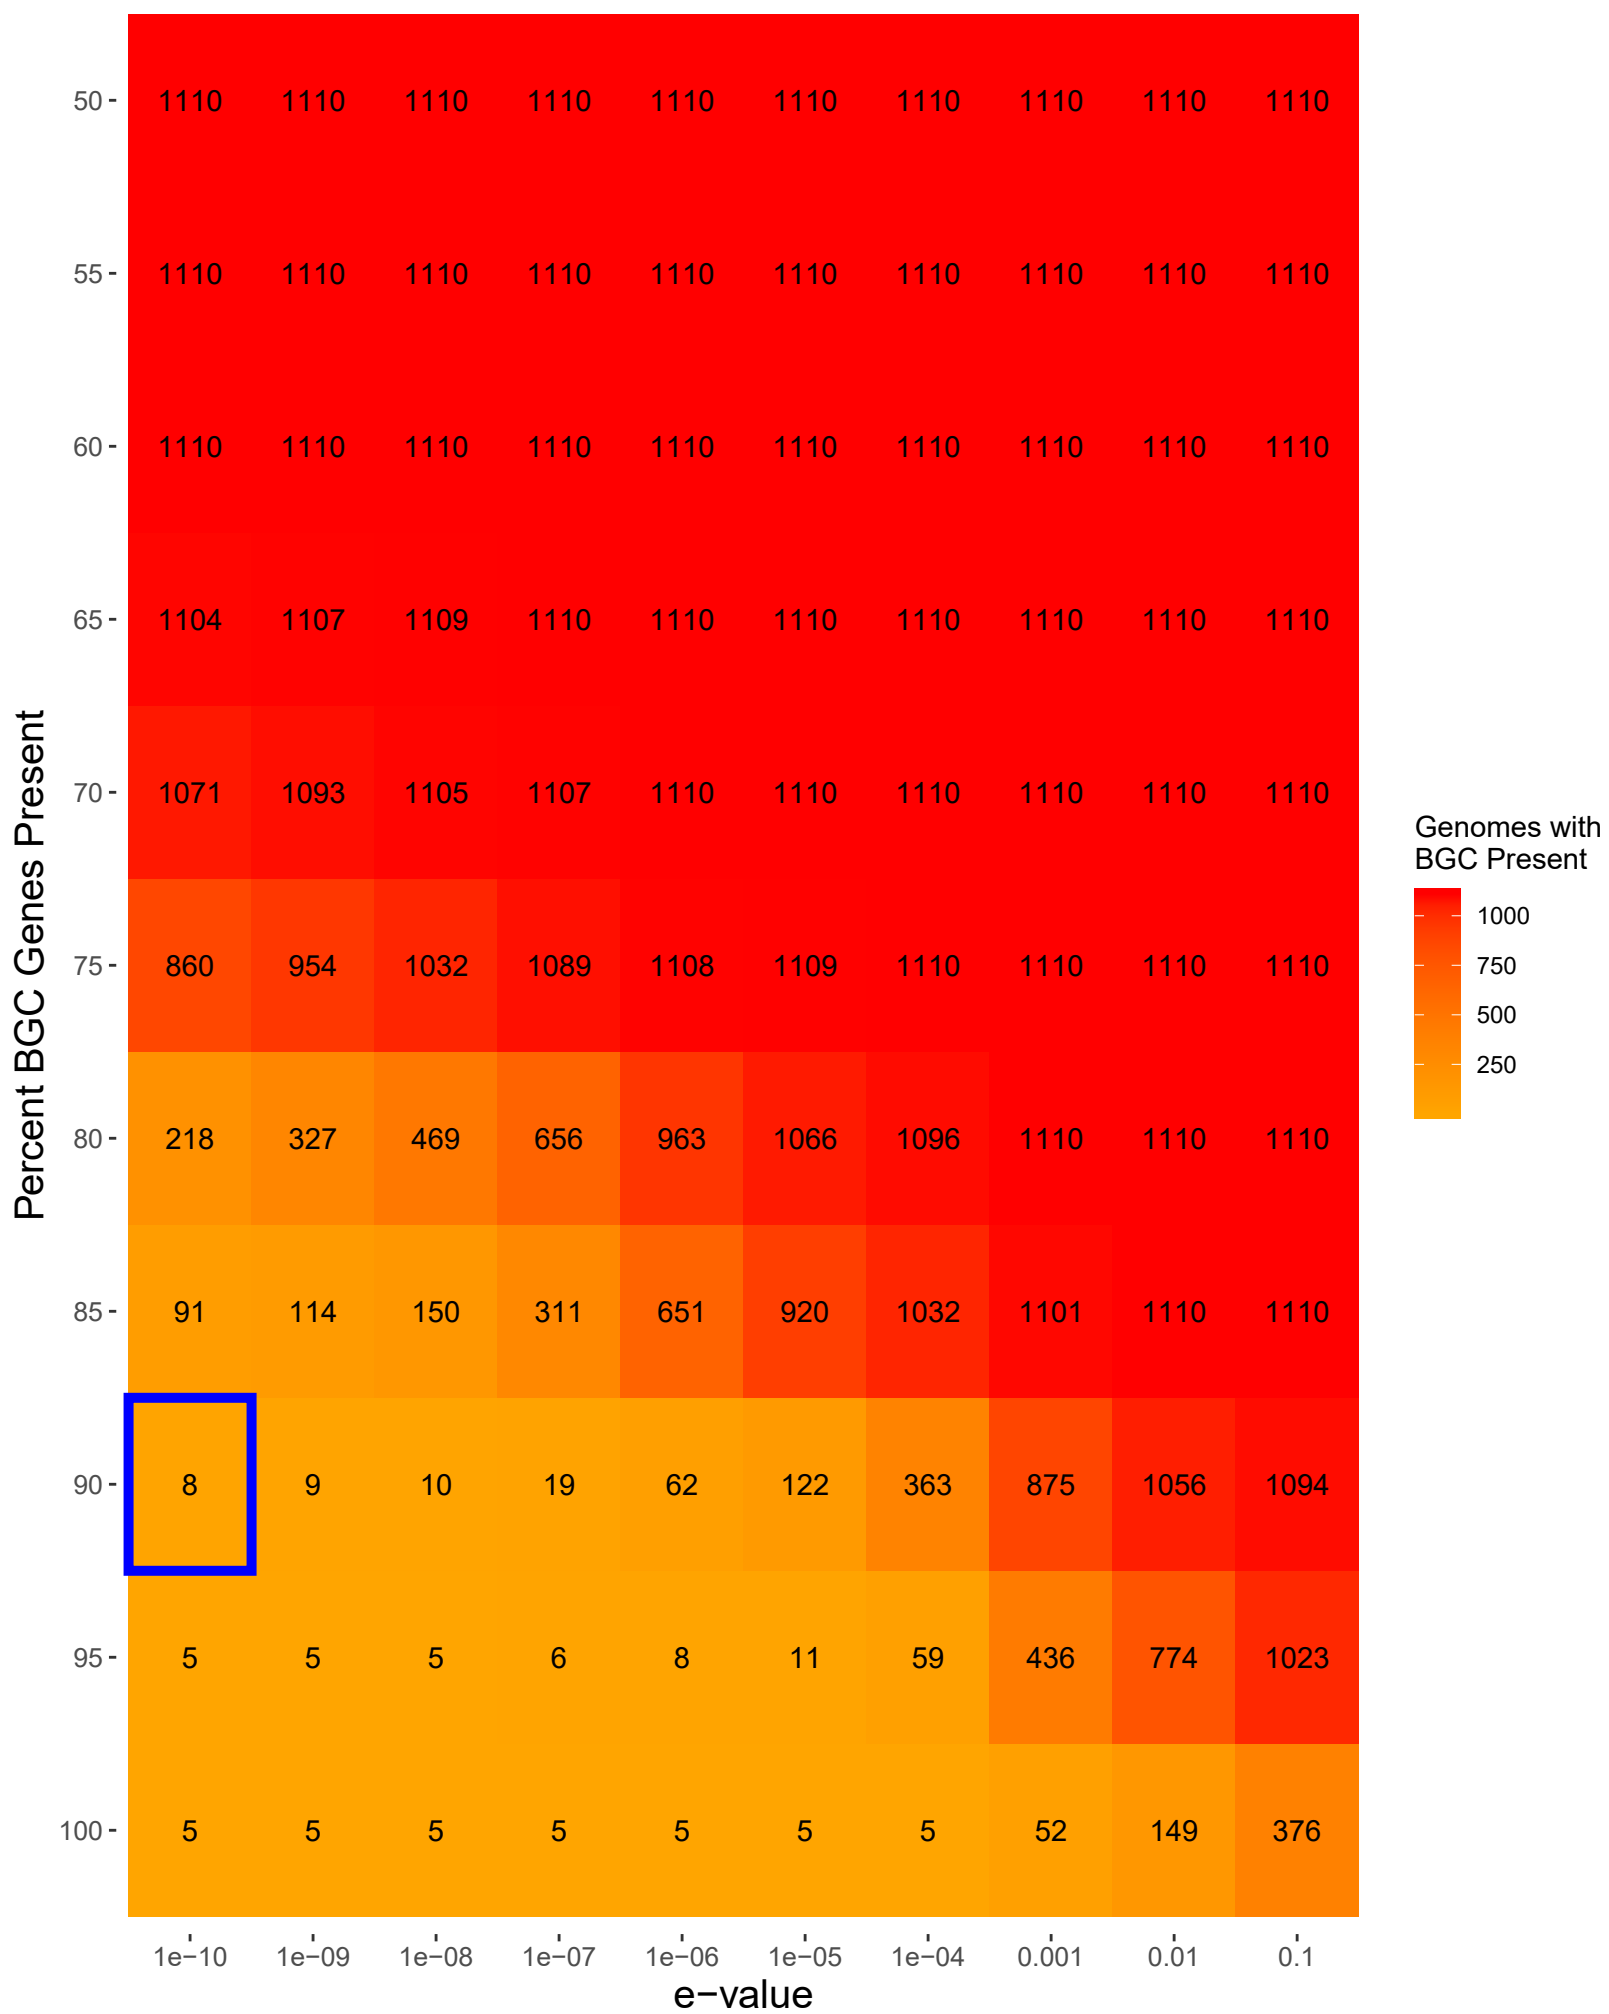

# Piericidin

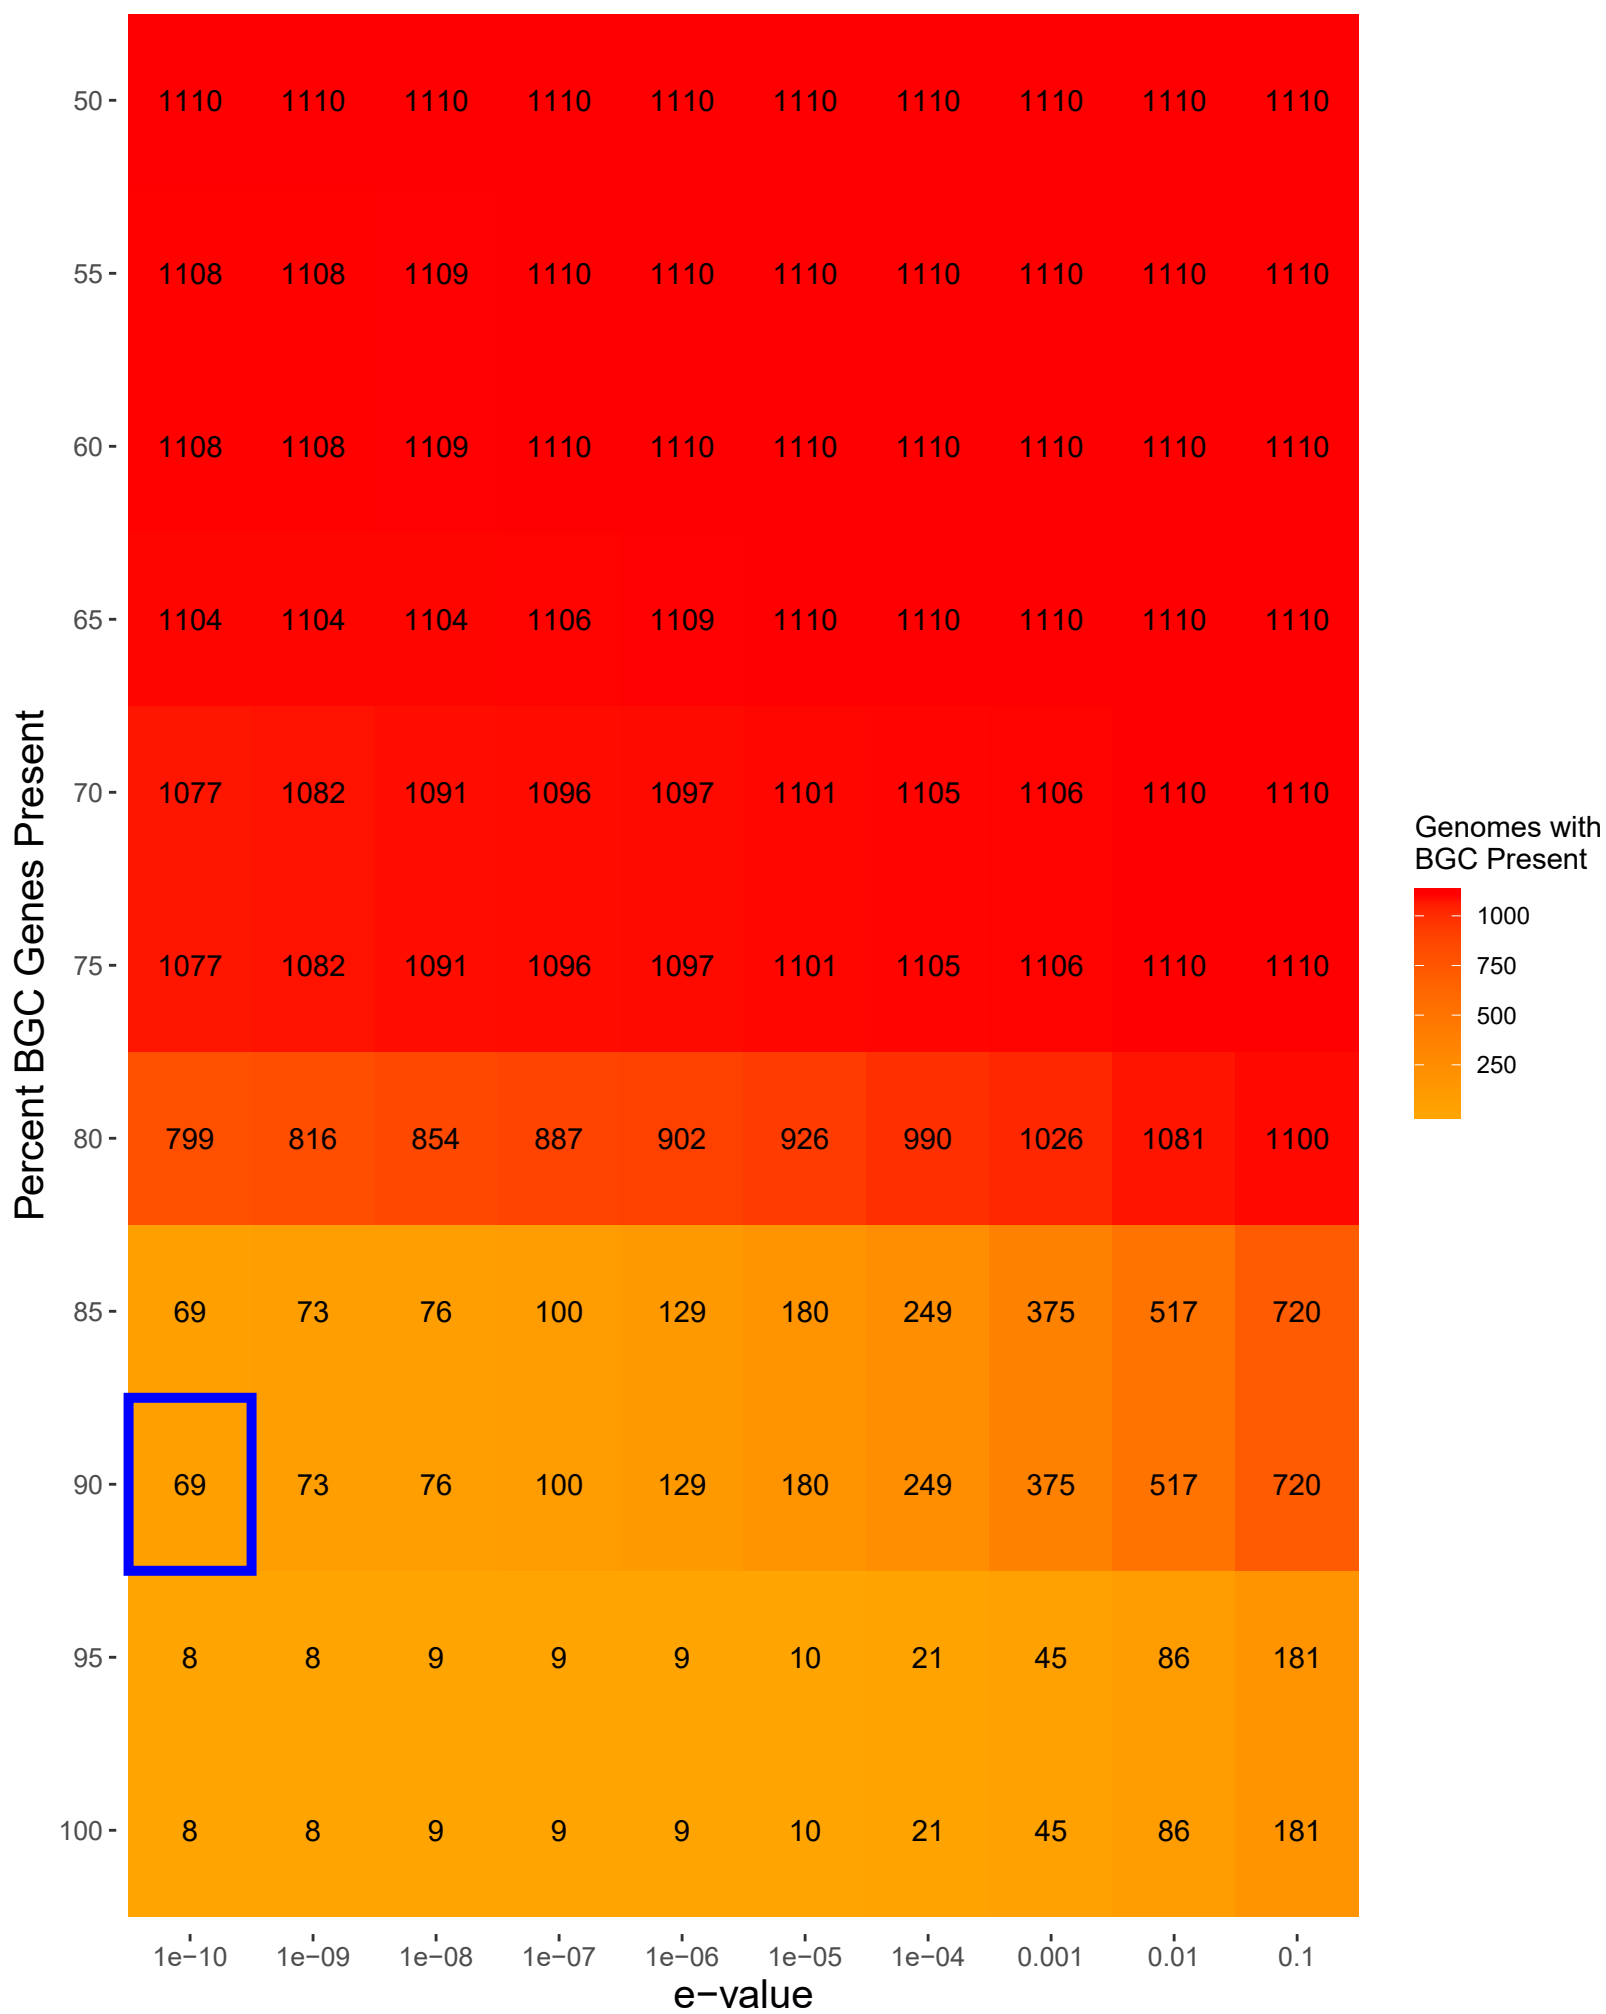



# Pladienolide

Percent BGC Genes Present

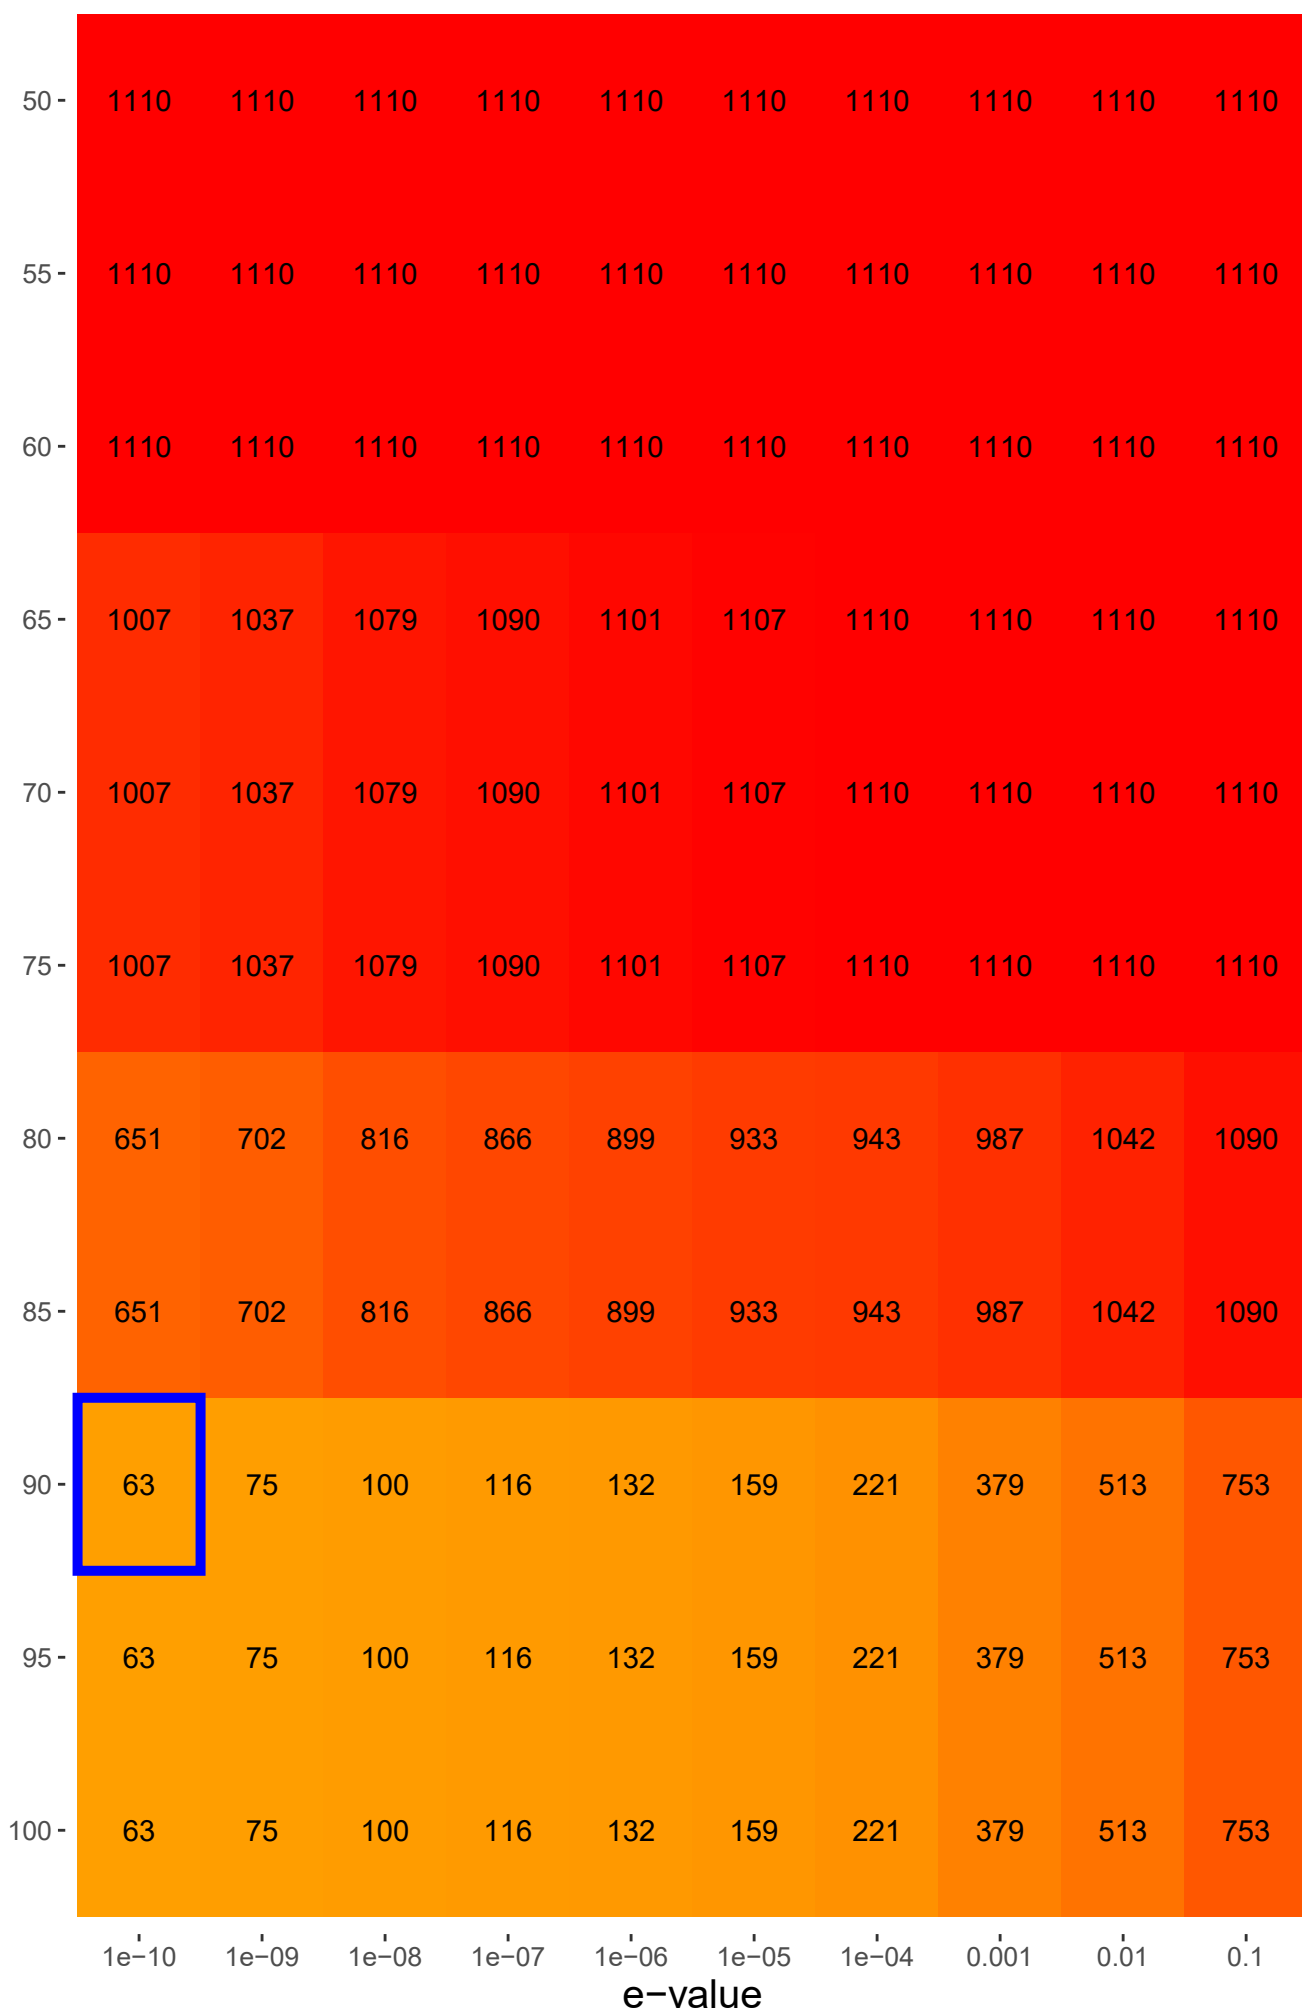

Genomes with BGC Present

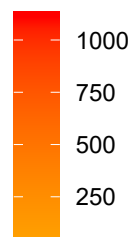

# Polyketomycin

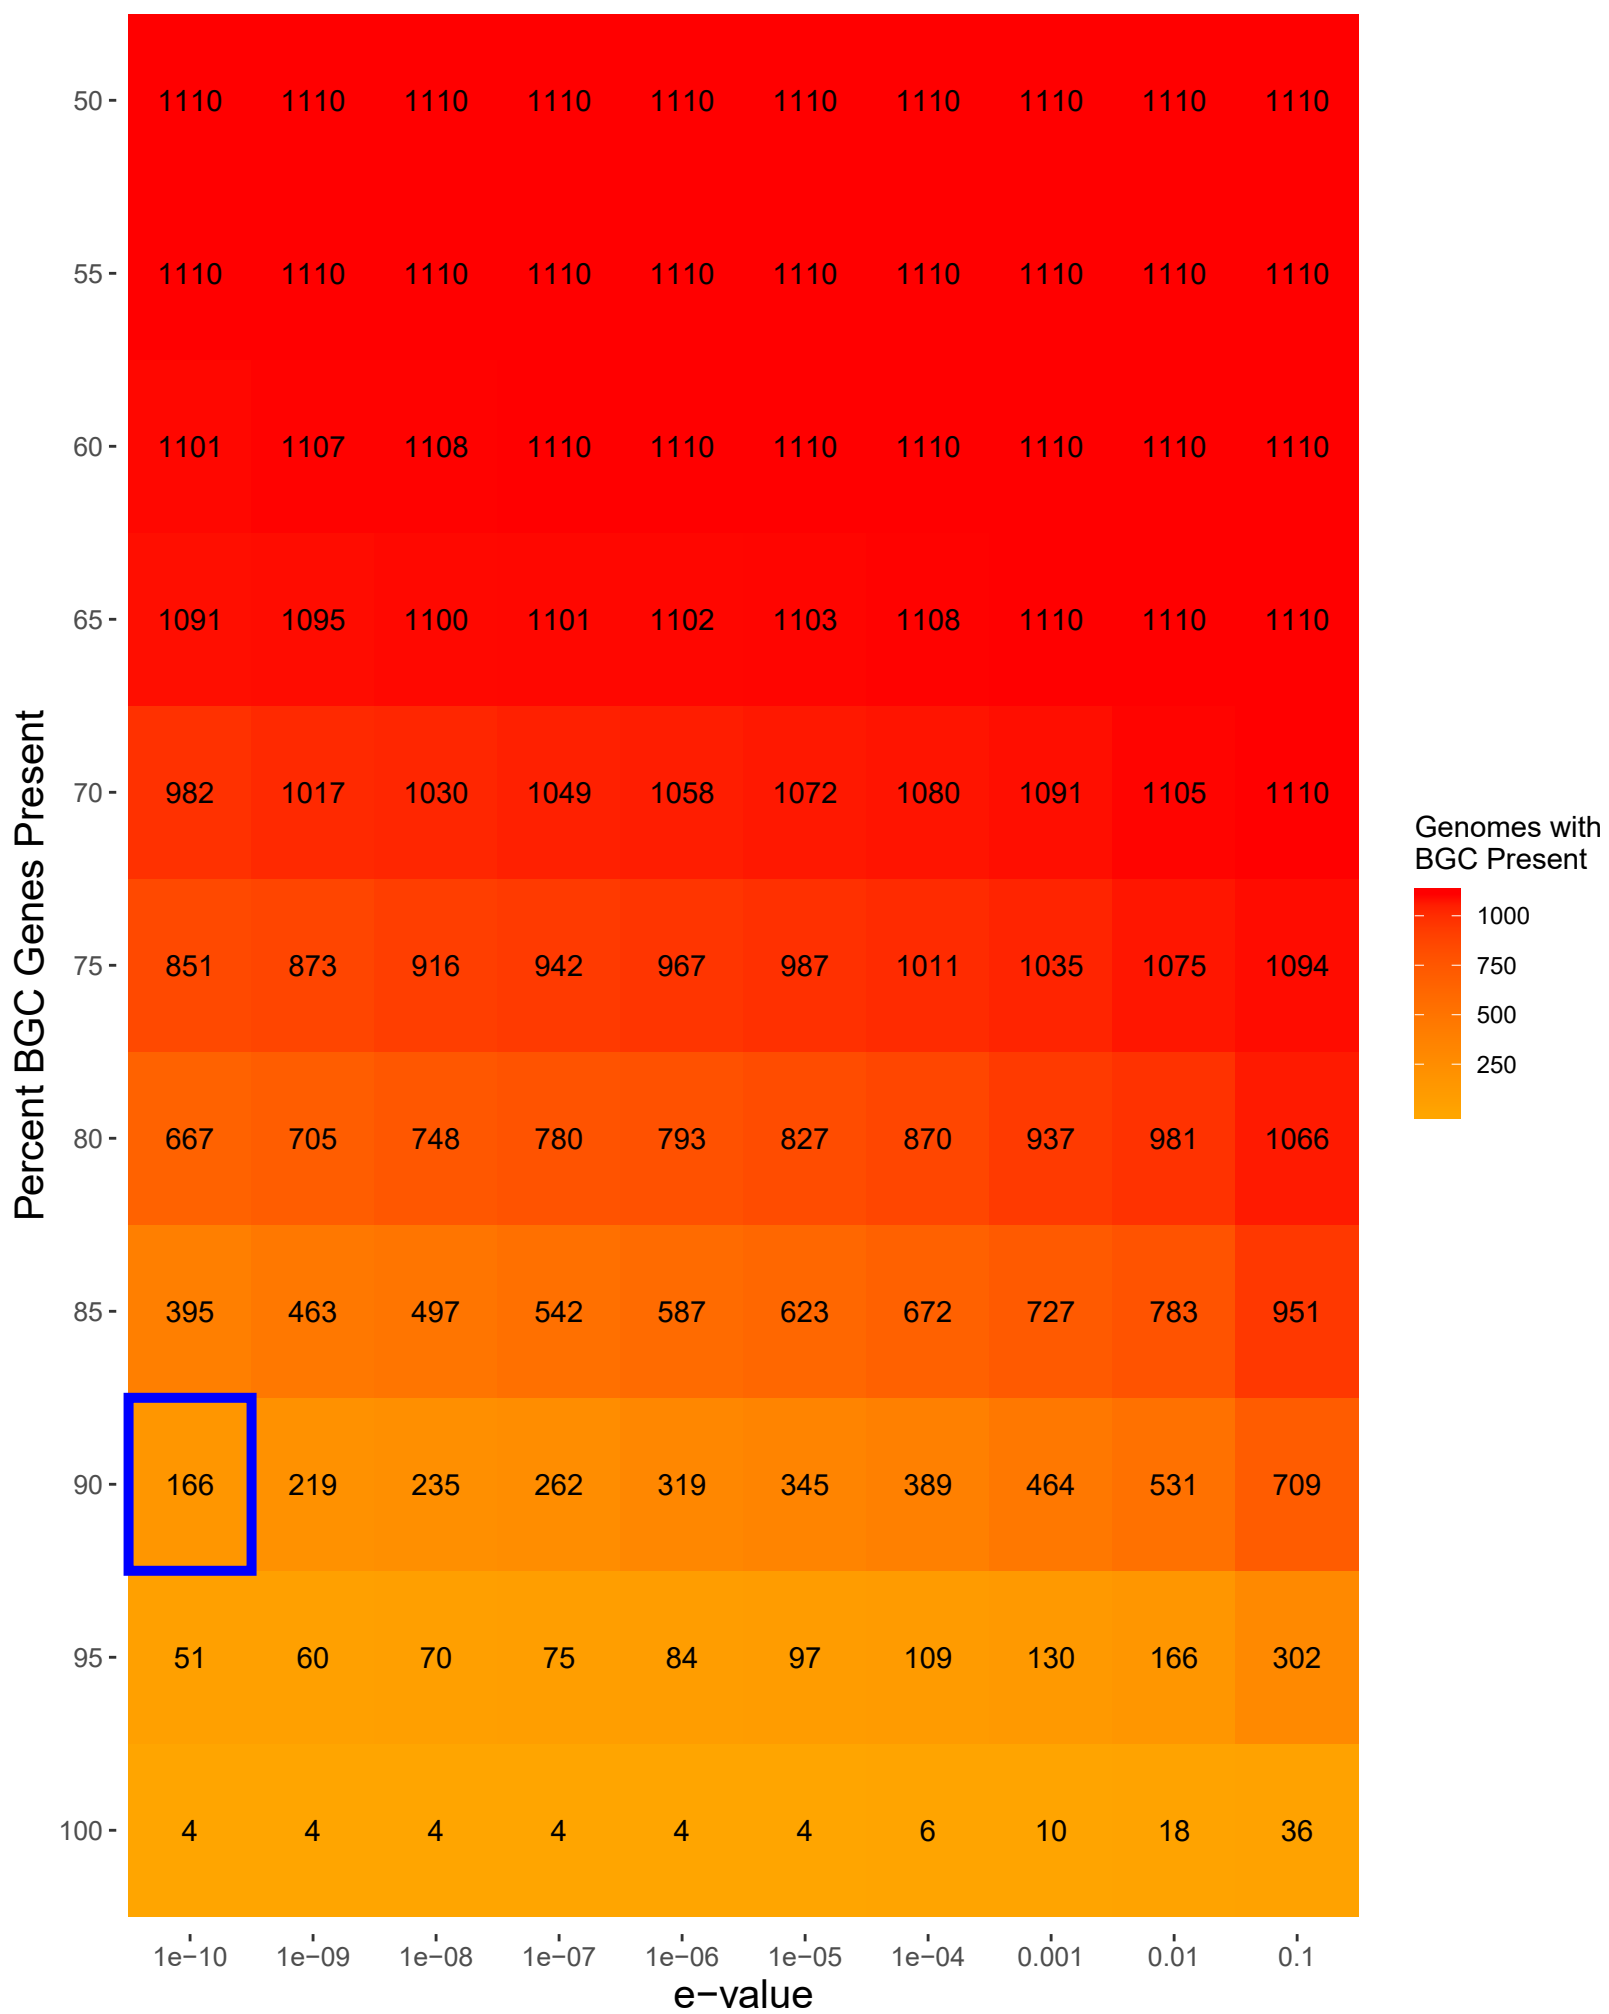







# Tautomycetin

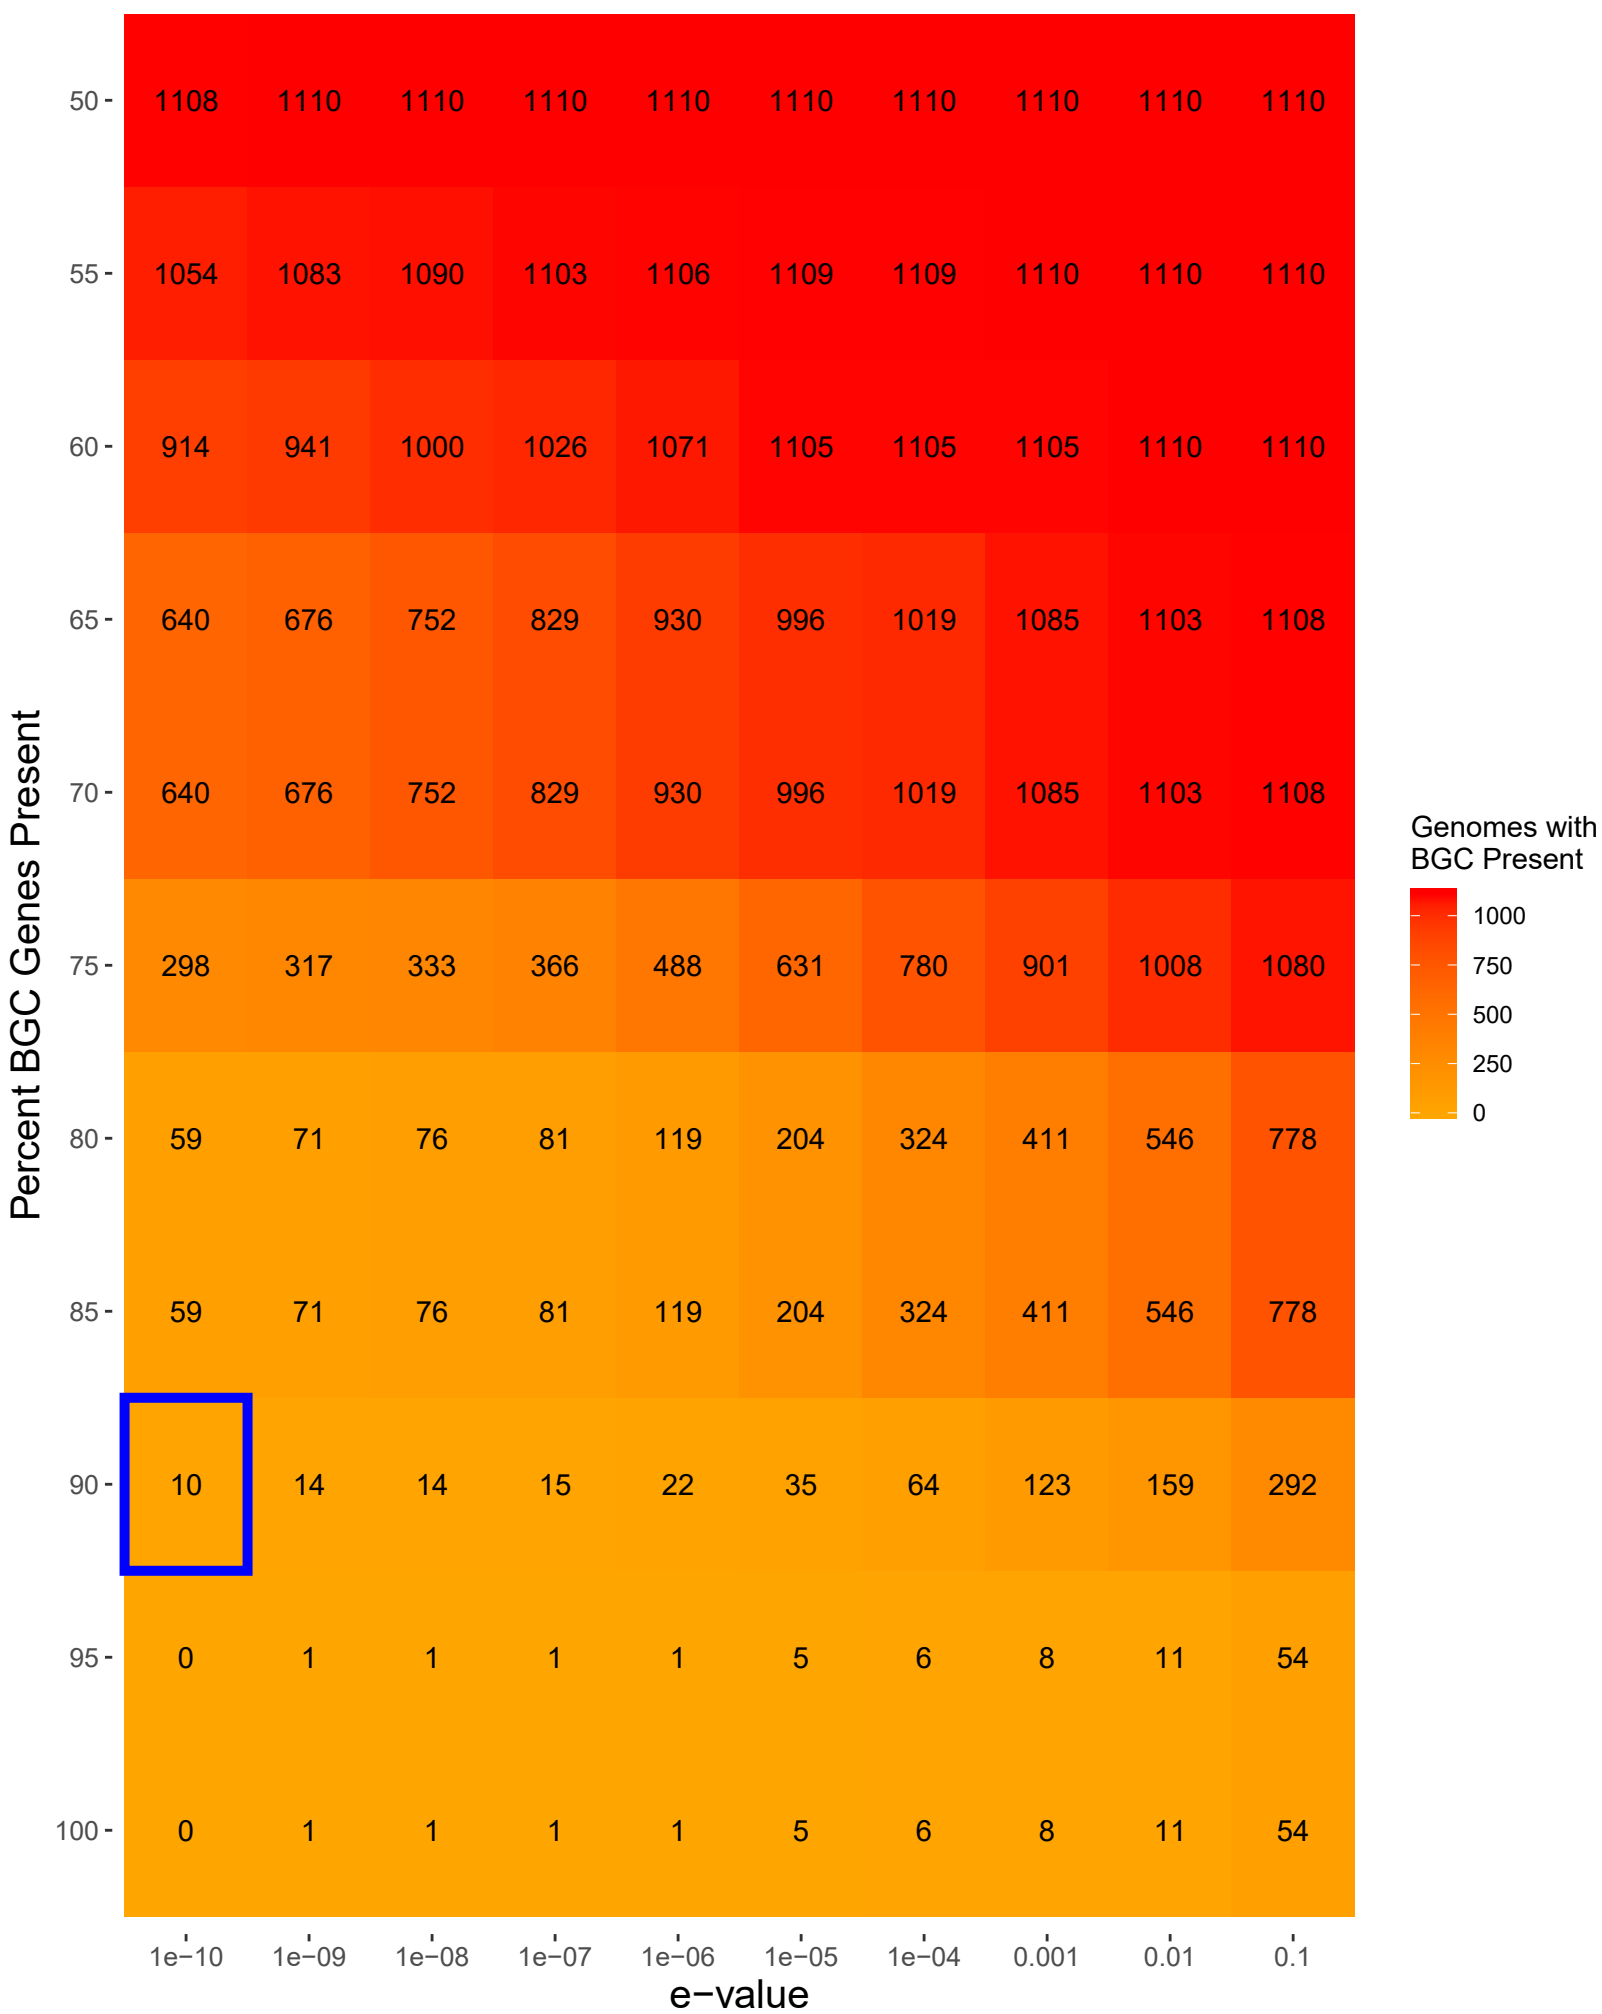



# Urdamycin

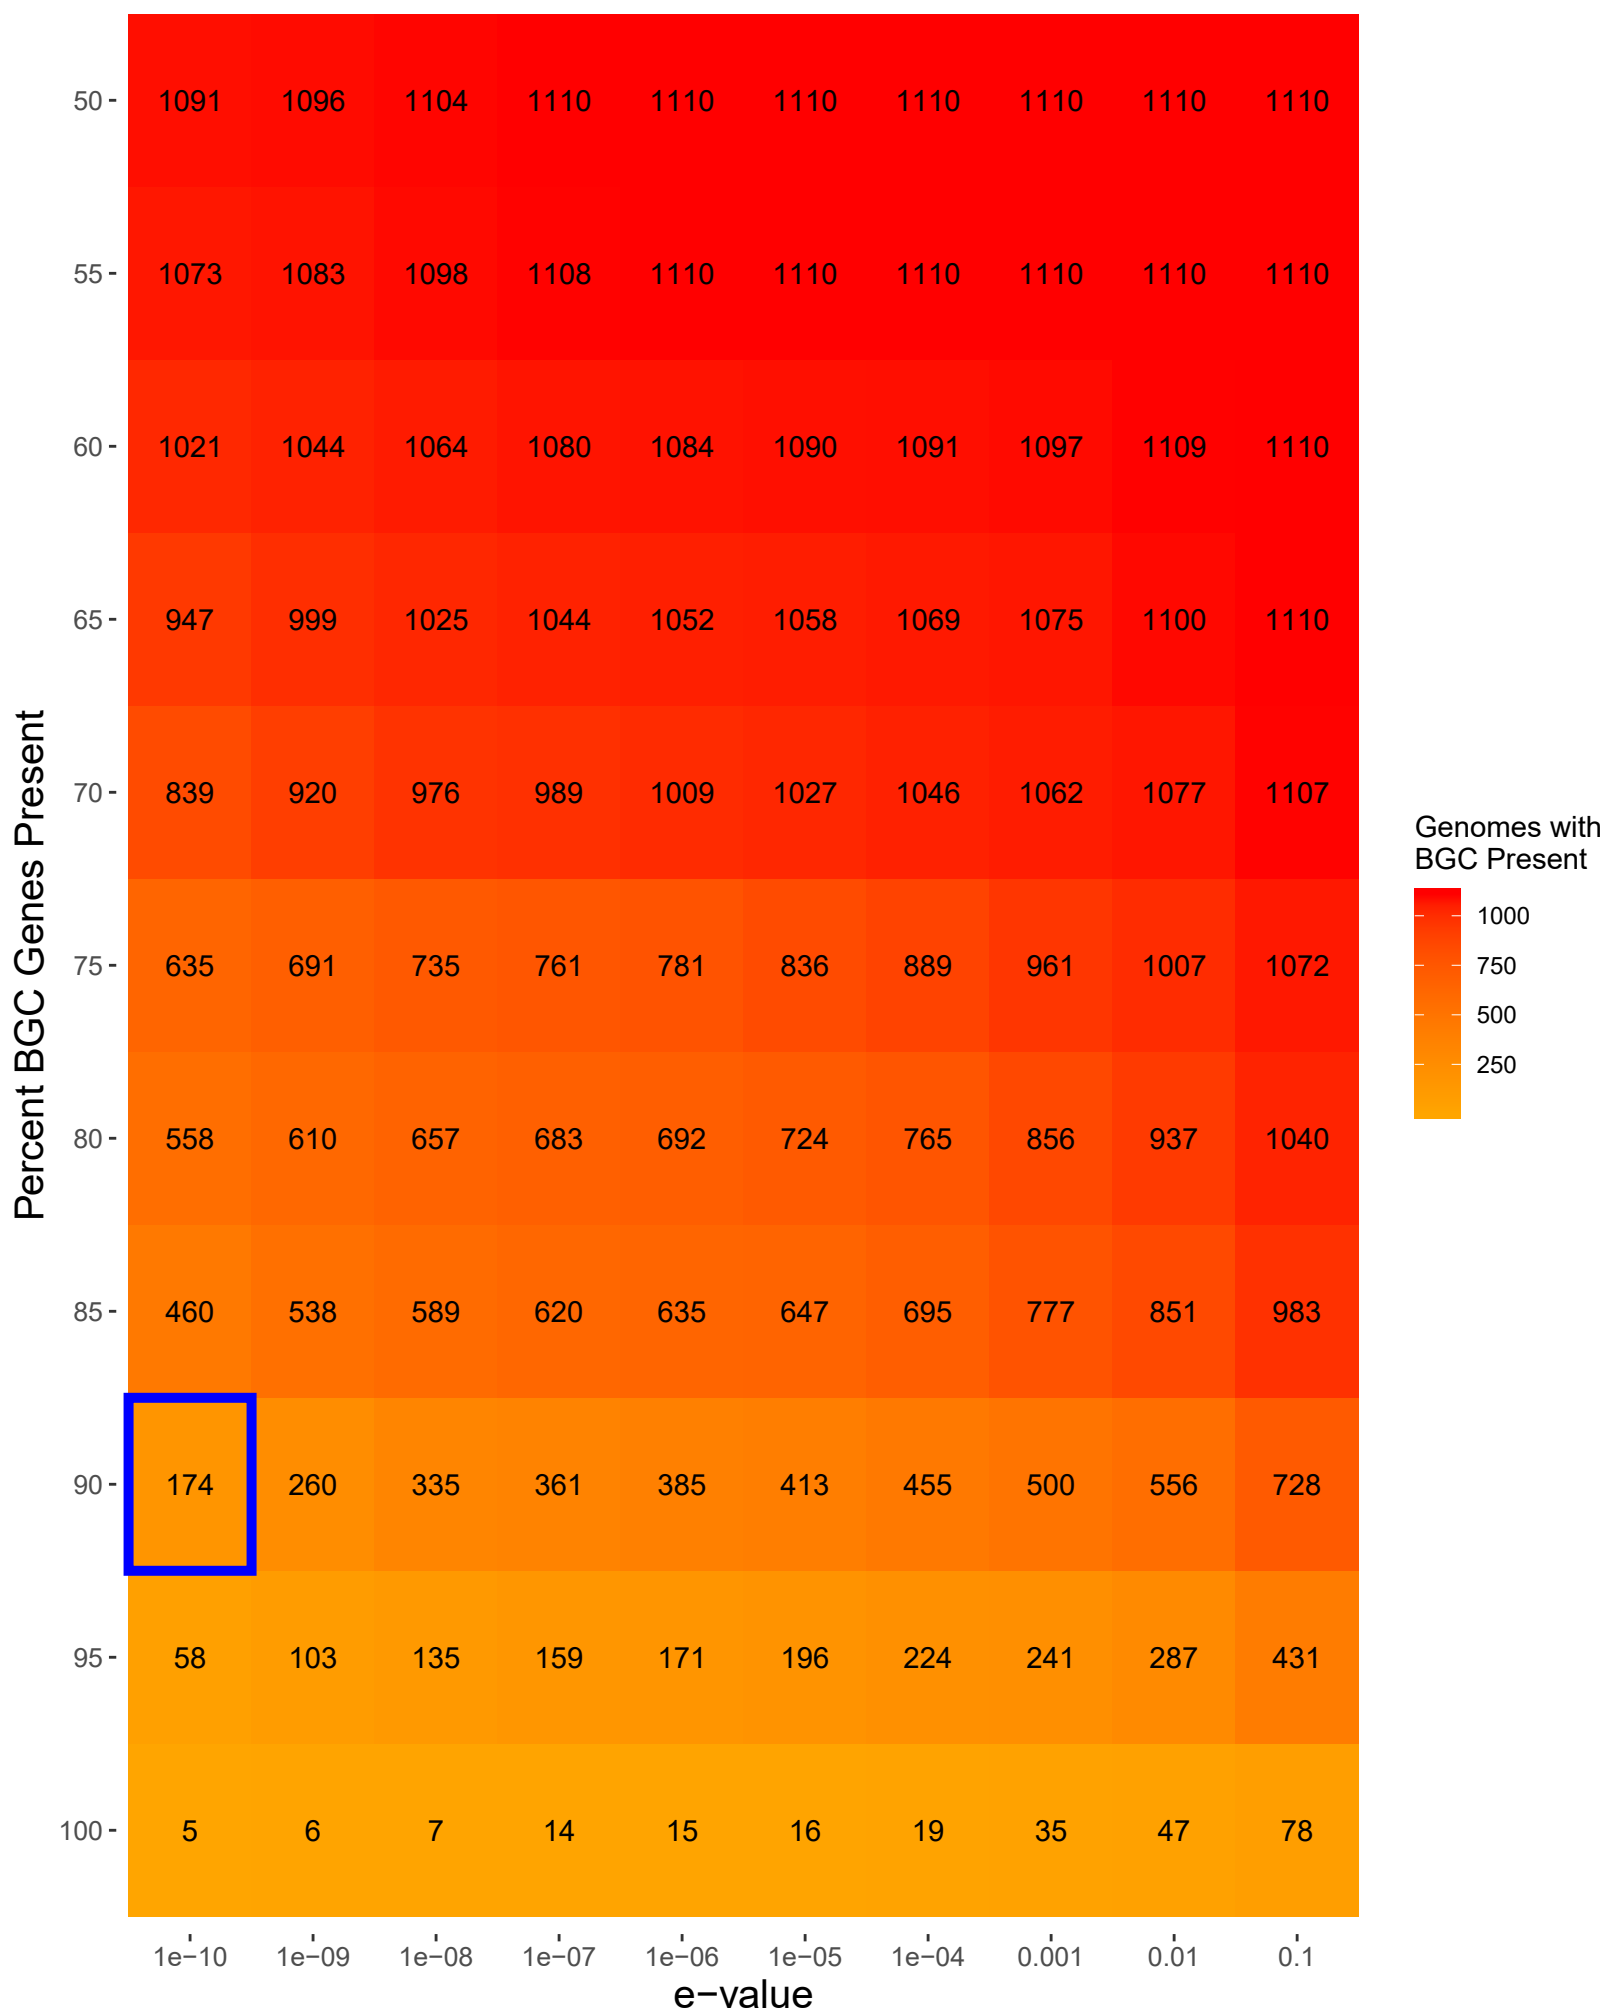



# Vicenistatin

Percent BGC Genes Present

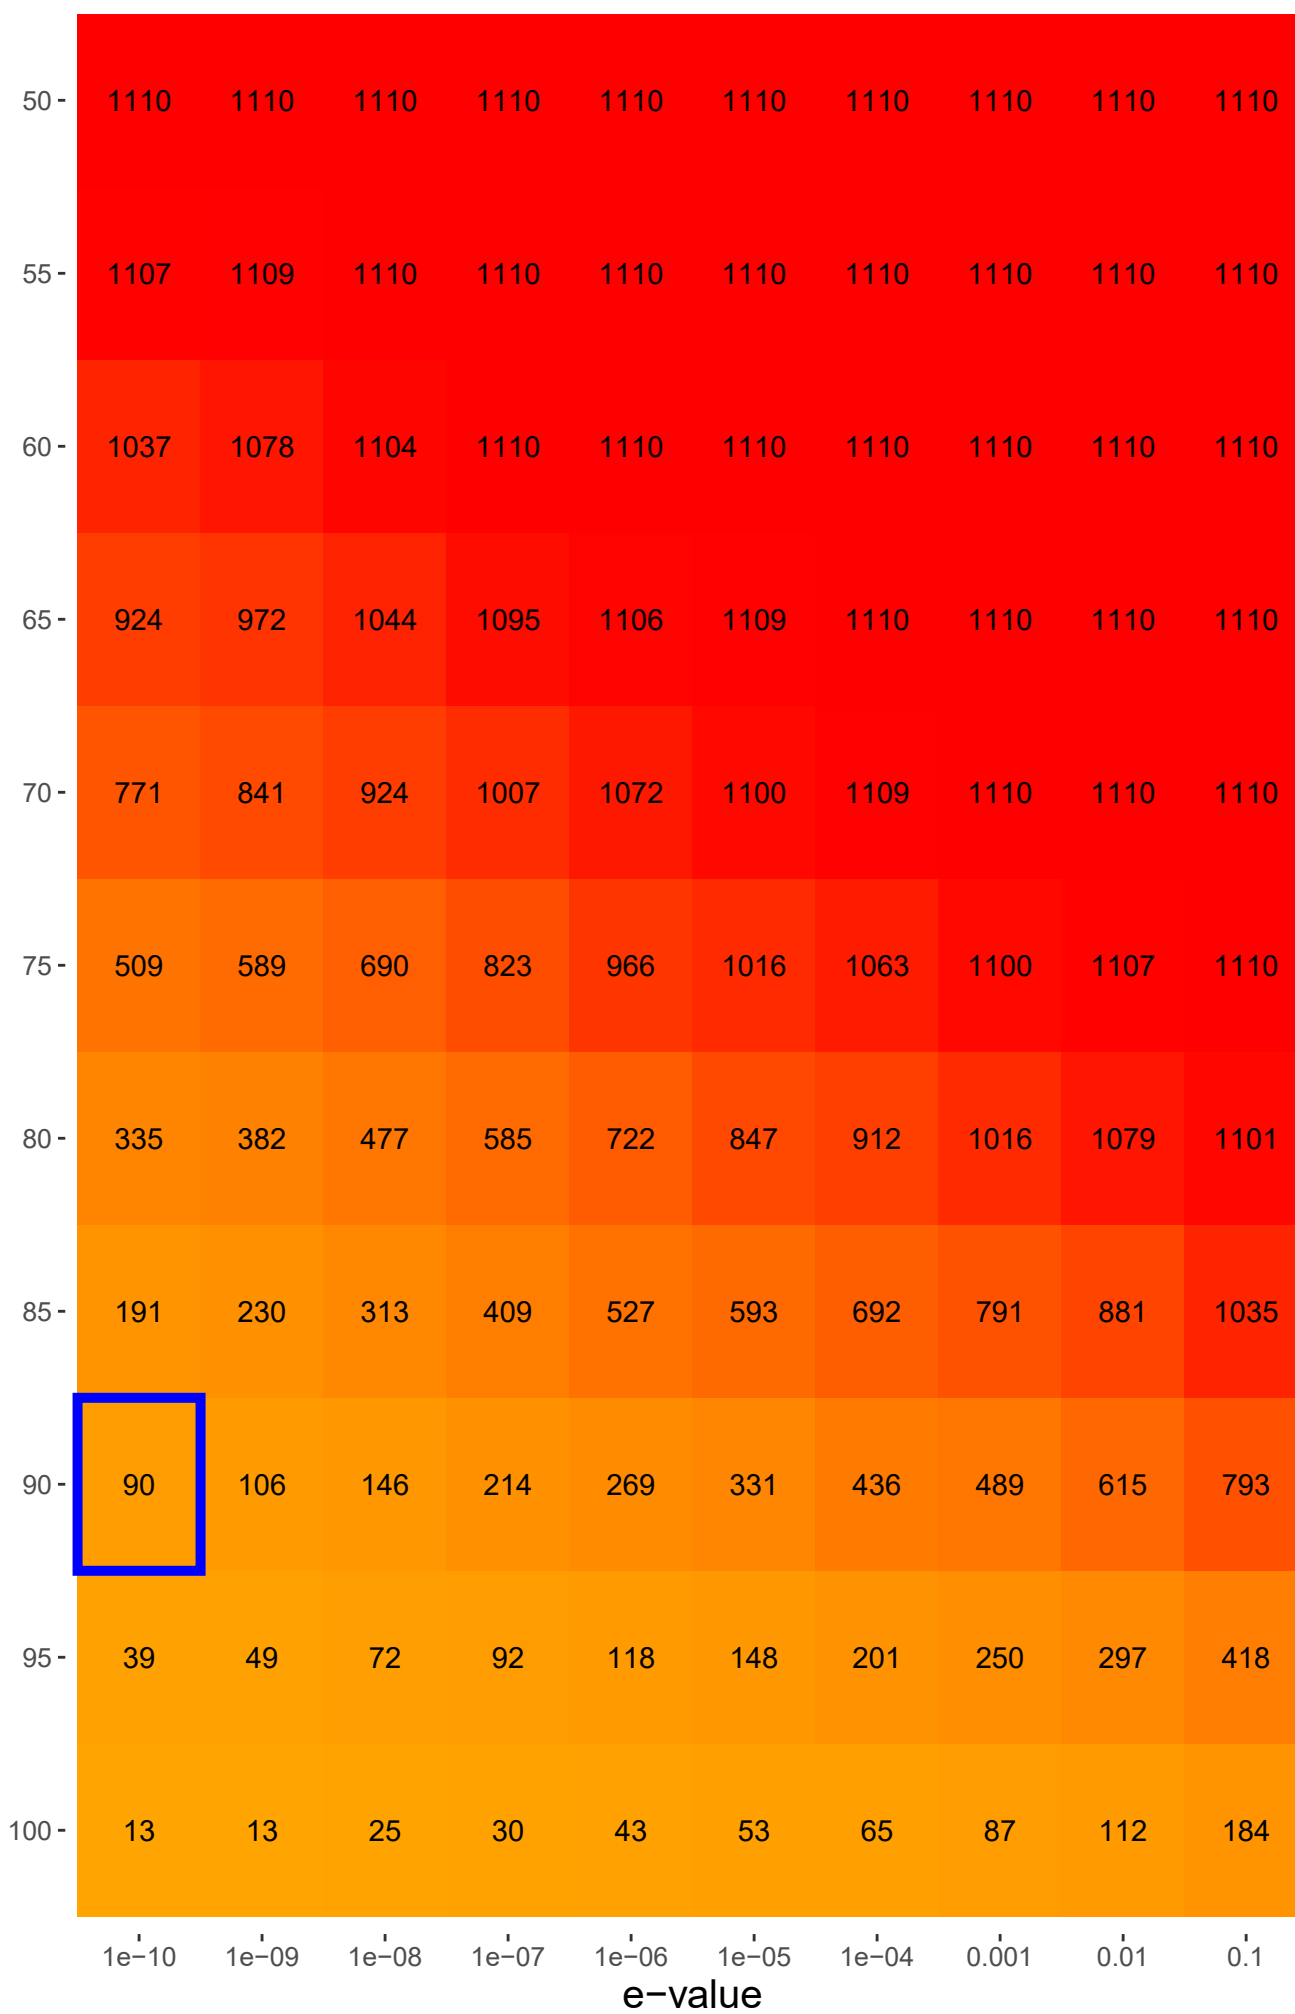

Genomes with BGC Present

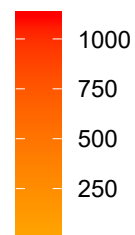

Supplement: 41598_2020_58904_MOESM1_ESM.pdf [file 41598_2020_58904_MOESM1_ESM.pdf]
